# Supplementary material for: Impact of obesity on life expectancy among different European countries: secondary analysis of population-level data over the 1975–2012 period
Source: PubMed Central journal article supplement (PMC6678519; doi:10.1136/bmjopen-2018-028086), 2019-07-31
Supplement: bmjopen-2018-028086.draft_revisions.pdf [file bmjopen-2018-028086.draft_revisions.pdf]

# BMJ Open

BMJ Open is committed to open peer review. As part of this commitment we make the peer review history of every article we publish publicly available.

When an article is published we post the peer reviewers' comments and the authors' responses online. We also post the versions of the paper that were used during peer review. These are the versions that the peer review comments apply to.

The versions of the paper that follow are the versions that were submitted during the peer review process. They are not the versions of record or the final published versions. They should not be cited or distributed as the published version of this manuscript.

BMJ Open is an open access journal and the full, final, typeset and author-corrected version of record of the manuscript is available on our site with no access controls, subscription charges or pay-per-view fees (<http://bmjopen.bmj.com>).

If you have any questions on BMJ Open's open peer review process please email [info.bmjopen@bmj.com](mailto:info.bmjopen@bmj.com)

# BMJ Open

## Impact of obesity on life expectancy among different European countries, 1975-2012

|                               |                                                                                                                                                                                                                                                                                                  |
|-------------------------------|--------------------------------------------------------------------------------------------------------------------------------------------------------------------------------------------------------------------------------------------------------------------------------------------------|
| Journal:                      | <i>BMJ Open</i>                                                                                                                                                                                                                                                                                  |
| Manuscript ID                 | bmjopen-2018-028086                                                                                                                                                                                                                                                                              |
| Article Type:                 | Research                                                                                                                                                                                                                                                                                         |
| Date Submitted by the Author: | 22-Nov-2018                                                                                                                                                                                                                                                                                      |
| Complete List of Authors:     | Vidra, Nikoletta; Population Research Centre, Faculty of Spatial Sciences, Demography<br>Trias-Llimós, Sergi; University of Groningen, Population Research Centre<br>Janssen, Fanny; University of Groningen, Population Research Centre;<br>Nederlands Interdisciplinair Demografisch Instituut |
| Keywords:                     | EPIDEMIOLOGY, NUTRITION & DIETETICS, PUBLIC HEALTH                                                                                                                                                                                                                                               |
|                               |                                                                                                                                                                                                                                                                                                  |

SCHOLARONE™  
Manuscripts

## Impact of obesity on life expectancy among different European countries, 1975-2012

Nikoletta Vidra<sup>1</sup>, Sergi Trias-Llimós<sup>1</sup>, Fanny Janssen<sup>1,2</sup>

<sup>1</sup> Population Research Centre, Faculty of Spatial Sciences, University of Groningen, Landleven 1, 9747 AD Groningen, The Netherlands.

<sup>2</sup> Netherlands Interdisciplinary Demographic Institute, Lange Houtstraat 19, 2511 CV The Hague, The Netherlands.

Corresponding author: Nikoletta Vidra, Population Research Centre, Faculty of Spatial Sciences, University of Groningen, PO Box 800, 9700 AV Groningen, The Netherlands. Tel: 0031 (0) 50 363 86 52; e-mail: n.vidra@rug.nl

**Word count: 3053 words**

## Abstract

**Objective:** This study assesses the impact of obesity on life expectancy for 26 European national populations and the USA over the 1975-2012 period.

**Design:** Secondary analysis of population-level obesity and mortality data.

**Setting:** European countries, namely Austria, Belarus, Belgium, the Czech Republic, Denmark, Estonia, Finland, France, Hungary, Iceland, Ireland, Italy, Latvia, Lithuania, Luxembourg, the Netherlands, Norway, Poland, Portugal, the Russian Federation, Slovakia, Spain, Sweden, Switzerland, Ukraine, the United Kingdom (UK); and the USA.

**Participants:** National populations aged 18–100 years, by sex.

**Measurements:** Using data by age and sex, we calculated obesity-attributable mortality by multiplying all-cause mortality (Human Mortality Database) with obesity-attributable mortality fractions (OAMFs). OAMFs were obtained by applying the partially adjusted method to obesity prevalence data (NCD Risk Factor Collaboration) and European Relative Risks (RRs) (DYNAMO). We estimated potential gains in life expectancy at birth (PGLE) by eliminating obesity-attributable mortality from all-cause mortality using associated single-decrement life tables.

**Results:** In the 26 European countries in 2012, PGLE due to obesity ranged from 0.86 to 1.67 years among men, and from 0.66 to 1.54 years among women. In all countries, PGLE increased over time, with an average annual increase of 2.68% among men and 1.33% among women. Among women in Denmark, Switzerland, and Central and Eastern European countries, the increase in PGLE levelled off after 1995. Without obesity, the average increase

1  
2  
3 in life expectancy between 1975 and 2012 would have been 0.78 years higher among men  
4  
5 and 0.30 years higher among women.  
6  
7

8  
9 **Conclusions:** Obesity was proven to have an impact on both life expectancy levels and  
10  
11 trends in Europe. The differences found in this impact between countries and the sexes can  
12  
13 be linked to contextual factors, as well as to differences in people's ability and capacity to  
14  
15 adopt healthier lifestyles.  
16  
17

18  
19 **Keywords:** Obesity, life expectancy, Europe, USA  
20  
21

## 22 23 **Article Summary**

### 24 25 **Strengths and limitations of the study**

- 26  
27 • This is the first study to assess the impact of obesity on life expectancy at birth over  
28  
29 time, and we do so here for 26 European countries and the USA.  
30  
31
- 32  
33 • We used recent long-term comparable data on obesity prevalence based on  
34  
35 population-based measurement studies, and European relative risks of dying from obesity by  
36  
37 age and sex from a recent meta-analysis.  
38  
39
- 40  
41 • Because of remaining data limitations regarding prevalence and relative risks, we had  
42  
43 to use a fairly simple – albeit common applied - methodology to estimate obesity-  
44  
45 attributable mortality.  
46  
47  
48  
49  
50  
51  
52  
53  
54  
55  
56  
57  
58  
59  
60

## Introduction

Obesity is a global epidemic (1), with Europe currently ranking second worldwide after the USA (2). Over the last 20 years obesity prevalence has increased threefold in Europe, (3) although not uniformly across countries (4). Estimates for 2014 indicate that obesity varied threefold across European countries, ranging from a low of 9% in Romania to a high of 26% in Malta (5). Obesity constitutes a serious health burden at the individual and population levels because it is associated with an increased risk of morbidity (6), and mortality (7). However, the potential impact of the increase in obesity on life expectancy trends remains largely unknown (8).

The few existing studies that assessed the impact of obesity on life expectancy at the population level provided estimates at one specific point in time only (9, 10). Olshansky et al. found that if obesity was eliminated, life expectancy at birth ( $e_0$ ) in the USA in 2000 would be 0.21 to 1.08 years higher, depending on gender and ethnicity (9). Preston et al. (10) estimated for 16 low-mortality countries in 2006 that the reduction in life expectancy at age 50 ( $e_{50}$ ) due to obesity was greatest in the USA, at more than 1.5 years; and ranged from 0.50 to 1.19 years for women and from 0.72 to 1.37 years for men in European countries.

Gaining insight into the impact of obesity on trends in life expectancy is especially relevant (11) given the marked differences in life expectancy trends across Europe (12). In Western European countries,  $e_0$  has been increasing steadily, and has risen six to eight years since 1970. But in Central and Eastern Europe (CEE),  $e_0$  stagnated or even declined between the 1970s and the 1980s, and did not start increasing again until the 1990s. There are also marked differences in  $e_0$  trends between individual European countries (12).

1  
2  
3 In light of these important differences between European countries in both obesity  
4 prevalence and life expectancy over time, our aim is to assess the impact of obesity on long-  
5 term trends in life expectancy across a wide range of European countries.  
6  
7  
8  
9

## 10 **Data and Methods**

### 11 **Setting**

12  
13  
14 We studied the impact of obesity on life expectancy by sex over the 1975-2012 period in 26  
15 European countries: Austria, Belarus, Belgium, the Czech Republic, Denmark, Estonia,  
16 Finland, France, Hungary, Iceland, Ireland, Italy, Latvia, Lithuania, Luxembourg, the  
17 Netherlands, Norway, Poland, Portugal, the Russian Federation, Slovakia, Spain, Sweden,  
18 Switzerland, Ukraine, the United Kingdom (UK); and the USA as a comparison country (10).  
19  
20  
21  
22  
23  
24  
25  
26  
27  
28  
29

### 30 **Data**

31  
32  
33 Long-term comparable obesity prevalence data (BMI $\geq$ 30kg/m<sup>2</sup>) by country, sex, age (18-19,  
34 20-24, ..., 85+), and year (1975-2012), based on population-based measurement studies, were  
35 obtained from the NCD Risk Factor Collaboration study (13). These validated data comprise  
36 the available measured height and weight data, supplemented with estimates based  
37 on information from other years and related countries from a Bayesian hierarchical model  
38 (13).  
39  
40  
41  
42  
43  
44  
45  
46  
47  
48

49 The age- (<50, 50-59, 60-69 and  $\geq$ 70 years) and sex-specific relative risks (RRs) of  
50 dying from obesity (see Appendix Table S1) came from a review of studies mainly conducted  
51 in Western Europe and the USA (14). These age- and sex-specific RRs were largely in line  
52 with the overall European RR of 1.64 recently estimated by the Global BMI Mortality  
53 Collaboration (15).  
54  
55  
56  
57  
58  
59  
60

All-cause mortality numbers and exposure population data by single year of age, sex, and year were obtained from the Human Mortality Database (16).

### Patient and Public Involvement

No patients were involved in this study.

### Methods

We performed our analyses separately by country and sex, based on data by single year of age (18-100). The obesity prevalence data were turned into single-age prevalence (18-100) by applying Loess smoothing (17). The RRs were turned into single-year RRs (18- 100) using linear regression.

To estimate the obesity-attributable mortality fraction (OAMF) – i.e., the share of all-cause mortality due to obesity – we used the Rockhill formula to estimate OAMFs by age (a) and sex (s) (18).

$$OAMF_{a,s} = \frac{P_{a,s} \cdot (RR_{a,s} - 1)}{1 + (P_{a,s} \cdot (RR_{a,s} - 1))} \text{ (Equation 1)}$$

where  $P$  is the obesity prevalence. We then weighted the  $OAMF_{a,s}$  with the corresponding number of deaths.

For the estimation of the impact of obesity on life expectancy (see 2.3.2) we needed age-and sex-specific (non-) obesity-attributable mortality rates. These were obtained by multiplying  $OAMF_{a,s}$  and  $[1 - OAMF_{a,s}]$ , respectively, with age- and sex-specific all-cause mortality rates.

To ensure comparability across countries, over time, and between men and women, we applied direct age- and sex-standardisation (19) to obesity prevalence, obesity-



1  
2  
3 attributable mortality fractions, and obesity-attributable mortality rates, using the European  
4  
5 population of 2011 (20) as the standard.  
6  
7

8  
9 To assess the impact of adult obesity on  $e_0$ , we calculated for each country the  
10  
11 potential gain in life expectancy (PGLE) if obesity-attributable mortality were eliminated, by  
12  
13 calendar year and sex. First, we calculated  $e_0$  by applying standard life table techniques to  
14  
15 age-specific all-cause mortality rates (0-100) (19). Second, we applied associated single-  
16  
17 decrement life tables (ASDLT) (19) to age- and sex-specific non-obesity-attributable mortality  
18  
19 rates (0-100) to obtain  $e_0$  if obesity-attributable mortality were eliminated. The PGLE  
20  
21 represents the difference between the  $e_0$  based on the ASDLT and the original  $e_0$ .  
22  
23  
24

25  
26 To summarise the changes in PGLE across countries, we estimated the average  
27  
28 annual changes in PGLE (in %):  
29  
30

$$31$$

$$32 \quad \text{Average annual changes in PGLE (\%)} = \frac{\sum_{t=1976}^{2012} \frac{(PGLE_t - PGLE_{t-1})}{PGLE_{t-1}}}{2012 - 1975} \times 100$$

$$33$$

$$34$$

$$35$$

$$36$$

$$37$$

$$38$$

39 To assess the impact of obesity on time trends in  $e_0$  between 1975 and 2012, we  
40  
41 subtracted the observed change in  $e_0$  from the change in  $e_0$  without obesity. The change in  
42  
43  $e_0$  without obesity was obtained by using the  $e_0$  values from the associated single-decrement  
44  
45 life tables applied to non-obesity-attributable mortality for 1975 and 2012.  
46  
47  
48

## 49 Results

50  
51  
52 For the 26 European countries, the age-standardised obesity-attributable mortality fraction  
53  
54 (OAMF) was, on average, 11% among men and 10% among women in 2012. For the USA,  
55  
56 these estimates were substantially higher; i.e., 15% and 14%, respectively. The average  
57  
58  
59  
60

OAMF levels were higher in Northern, Western, and Southern Europe combined (hereafter, Western Europe) than in CEE among men, while the opposite was the case among women.

OAMFs were increasing over time for all countries and both sexes, although not to the same extent (see Figure 1, Figure S1). In Western Europe, OAMFs generally increased over the 1975-2012 period, and at a faster pace among men. In CEE, by contrast, OAMFs clearly stagnated, and even declined between 1990 and 2000. The overall increase in OAMFs was greatest in the USA, Ireland, Norway (men), and the UK (women).

**Figure 1: Age-standardised obesity-attributable mortality fractions in 26 European countries (by 5 regions) and USA, 1975-2014, 18-100 years**

<approximately here>

In the 26 European countries in 2012, estimates of potential gains in life expectancy at birth (PGLE) if obesity was eliminated ranged from 0.86 to 1.67 years among men (1.22 on average) and from 0.66 to 1.54 years (0.98 on average) among women (Figure 2; Figure S2 and Table S2 Appendix). Among men in the USA, the PGLE estimate was, at 1.73 years, slightly higher than the highest estimate in Europe; and among women in the USA, the PGLE estimate was, at 1.44 years, the second-highest after the estimate for Russia. The average PGLE estimate was 1.08 among men and 0.86 among women in Western Europe, and was 1.44 among men and 1.16 among women in CEE (see Appendix Table S2).

1  
2  
3 **Figure 2: Potential gains in life expectancy at birth (PGLE) if obesity-attributable mortality**  
4 **was eliminated, in 26 European countries (differentiating Western and Central Eastern**  
5 **Europe) and the USA, 1975-2012**  
6  
7  
8  
9

10  
11 <approximately here>  
12  
13

14 Overall, from 1975 to 2012, PGLE due to obesity increased in all of the countries (Figure  
15 2, Figure S2, Figure 3, 4). The increase was greater among men (average annual increase of  
16 2.68%) than among women (average annual increase of 1.33%), was largest among men in  
17 Portugal and Belarus and among women in Portugal, and was substantial among men and  
18 women in Norway (Figure 3, 4). While there was a general increase in PGLE due to obesity,  
19 this trend stagnated among women in CEE from around 1990 onwards, and levelled off after  
20 1995 among women in Denmark and Switzerland.  
21  
22  
23  
24  
25  
26  
27  
28  
29  
30  
31

32 **Figure 3: Average annual increase (%) in potential gains in life expectancy due to obesity in**  
33 **26 European countries and the USA between 1975-2012, in men**  
34  
35

36 <approximately here>  
37  
38  
39  
40

41 **Figure 4: Average annual increase (%) in potential gains in life expectancy due to obesity in**  
42 **26 European countries and the USA between 1975-2012, in women**  
43  
44

45 <approximately here>  
46  
47

48 Table 1 shows the impact of obesity on time trends in life expectancy at birth ( $e_0$ ).  
49 Overall, the average increase in  $e_0$  between 1975 and 2012 was 7.26 years for men and 6.28  
50 years for women in the 26 European countries. Without obesity, the average increase in  $e_0$   
51 would have been 8.04 years for men and 6.58 years for women; or 0.78 and 0.30 years  
52 higher, respectively. Among men, obesity had the greatest impact on  $e_0$  trends in Lithuania  
53  
54  
55  
56  
57  
58  
59  
60

and the USA (more than one year), and the smallest impact in Iceland and Sweden (0.5 years). Among women, obesity had the greatest impact on  $e_0$  trends in the USA and Ireland (0.7 years) and the smallest impact in Estonia and the Czech Republic (less than 0.1 year).

**Table 1: Impact of obesity on trends in life expectancy at birth ( $e_0$ ) in 26 European countries and USA 1975-2012, by sex**

| Country                      | Change in $e_0$ with obesity 2012-1975 (years) |       | Change in $e_0$ without obesity 2012-1975 (years) |       | Effect of obesity on $e_0$ change 2012-1975 (years) |       |
|------------------------------|------------------------------------------------|-------|---------------------------------------------------|-------|-----------------------------------------------------|-------|
|                              | Men                                            | Women | Men                                               | Women | Men                                                 | Women |
|                              | Austria                                        | 10.62 | 8.61                                              | 11.25 | 8.95                                                | 0.63  |
| Belarus                      | -0.55                                          | 1.43  | 0.46                                              | 1.83  | 1.00                                                | 0.40  |
| Belgium                      | 8.85                                           | 7.63  | 9.46                                              | 7.99  | 0.61                                                | 0.36  |
| Czech Republic               | 7.97                                           | 6.98  | 8.66                                              | 7.03  | 0.69                                                | 0.05  |
| Denmark                      | 6.78                                           | 5.03  | 7.40                                              | 5.36  | 0.63                                                | 0.33  |
| Estonia                      | 6.43                                           | 6.42  | 7.26                                              | 6.46  | 0.82                                                | 0.04  |
| France                       | 9.49                                           | 7.99  | 10.17                                             | 8.30  | 0.68                                                | 0.31  |
| Finland                      | 10.07                                          | 7.26  | 10.82                                             | 7.75  | 0.74                                                | 0.50  |
| Hungary                      | 5.29                                           | 6.18  | 6.17                                              | 6.36  | 0.87                                                | 0.18  |
| Iceland                      | 9.02                                           | 5.19  | 9.51                                              | 5.51  | 0.48                                                | 0.32  |
| Ireland                      | 9.40                                           | 8.40  | 10.22                                             | 9.10  | 0.83                                                | 0.69  |
| Italy                        | 10.19                                          | 8.56  | 10.81                                             | 8.89  | 0.62                                                | 0.33  |
| Latvia                       | 4.91                                           | 4.53  | 5.82                                              | 4.70  | 0.90                                                | 0.18  |
| Lithuania                    | 2.01                                           | 3.80  | 3.14                                              | 4.06  | 1.13                                                | 0.26  |
| Luxembourg                   | 11.78                                          | 9.27  | 12.50                                             | 9.65  | 0.72                                                | 0.37  |
| Netherlands                  | 7.68                                           | 5.10  | 8.26                                              | 5.6   | 0.56                                                | 0.49  |
| Norway                       | 7.70                                           | 5.33  | 8.42                                              | 5.86  | 0.74                                                | 0.51  |
| Poland                       | 5.90                                           | 6.74  | 6.81                                              | 7.00  | 0.91                                                | 0.27  |
| Portugal                     | 12.14                                          | 10.87 | 12.91                                             | 11.26 | 0.77                                                | 0.40  |
| Russian Federation           | 2.05                                           | 2.62  | 3.06                                              | 2.89  | 1.02                                                | 0.28  |
| Slovakia                     | 5.65                                           | 5.82  | 6.52                                              | 6.16  | 0.88                                                | 0.34  |
| Spain                        | 8.82                                           | 8.75  | 9.62                                              | 9.14  | 0.79                                                | 0.39  |
| Sweden                       | 7.69                                           | 5.59  | 8.18                                              | 5.93  | 0.49                                                | 0.33  |
| Switzerland                  | 8.98                                           | 6.63  | 9.55                                              | 6.93  | 0.58                                                | 0.30  |
| Ukraine                      | 0.48                                           | 1.73  | 1.26                                              | 1.94  | 0.78                                                | 0.21  |
| United Kingdom               | 9.46                                           | 6.96  | 10.20                                             | 7.55  | 0.74                                                | 0.59  |
| USA                          | 7.86                                           | 4.89  | 8.90                                              | 5.61  | 1.04                                                | 0.71  |
| <b>Average CEE countries</b> | 4.01                                           | 4.63  | 4.92                                              | 4.84  | 0.90                                                | 0.22  |

1  
2  
3 **Average Western** 9.10 7.09 9.76 7.50 0.66 0.41  
4 **countries**  
5  
6  
7  
8  
9  
10  
11

## 12 **Discussion**

### 15 **Summary of results**

16  
17  
18 In the 26 European countries studied, the share of mortality due to obesity in 2012 was, on  
19 average, 11% among men and 10% among women. PGLE due to obesity in 2012 ranged from  
20 0.86 to 1.73 years among men, and from 0.66 to 1.54 years among women. Overall, PGLE  
21 increased between 1975 and 2012, albeit more quickly among men (average annual  
22 increase: 2.68%) than among women (1.33%). Among women in Denmark, Switzerland, and  
23 the CEE countries the increase in PGLE levelled off after 1995. Without obesity, the average  
24 increase in e0 between 1975 and 2012 would have been 0.78 years higher among men and  
25 0.30 years higher among women.  
26  
27  
28  
29  
30  
31  
32  
33  
34  
35  
36  
37  
38

### 39 **Evaluation of data and methods**

40  
41  
42 Using the recent advances in obesity data, it is now possible to study the impact of obesity  
43 on life expectancy for a large number of countries and a long period of time. Two  
44 methodological issues warrant our attention, however.  
45  
46  
47  
48

49 First, in calculating the share of mortality due to obesity (OAMF), which also forms  
50 the basis for our PGLE calculations, we were hindered by limitations in the available  
51 prevalence and RRs data, which also affected the method used. As has previously been  
52 documented, OAMF estimates are sensitive to the data and the methods used (21).  
53  
54  
55  
56  
57  
58

59 In selecting obesity prevalence data, we used the longest validated time series based  
60

1  
2  
3 on population-based measurement studies that are suitable for studying the impact of obesity  
4  
5 on long-term life expectancy trends across Europe (13). For those countries with less available  
6  
7 obesity data – especially CEE countries – a portion of the data we used were modelled, and  
8  
9 these should be treated with some caution (13).  
10  
11

12  
13 Because age- and sex-specific RRs of mortality associated with obesity are not  
14  
15 available by country and year, we applied to all of the countries studied time-constant age-  
16  
17 and sex-specific RRs from Western European and US populations that are largely suitable for  
18  
19 our setting. However, literature for the USA has demonstrated that RRs have been changing  
20  
21 over time, pointing to both a decline (22-24) and an increase (25). Before implementing  
22  
23 time-variant European RRs, more information on their direction is required. Similarly,  
24  
25 comparable country-specific RRs are urgently needed.  
26  
27  
28

29  
30 Based on the available data, only a fairly simple – albeit common applied –the  
31  
32 partially adjusted method could be applied (21) to estimate the OAMFs. The application of a  
33  
34 more advanced methodology (21) could have affected the OAMFs and thus the PGLE levels,  
35  
36 but less the trends (26).  
37  
38

39  
40 Second, besides being the result of the OAMFs, the PGLE estimates can also be  
41  
42 affected by all-cause mortality levels and trends as age- and sex-specific all-cause mortality  
43  
44 rates are used to estimate PGLE. Since all-cause mortality fluctuated greatly in CEE in the  
45  
46 analysed period (12), short-term variations in PGLE in CEE countries should be treated with  
47  
48 more caution.  
49  
50

### 51 **Explanation of results**

52  
53

54  
55 In 2012, the PGLE due to obesity were, on average, 1.22 years for men and 0.98 years for  
56  
57 women in the 26 European countries, and 1.73 years for men and 1.43 years for women in  
58  
59 the USA. A comparison of our 2006 e50 estimates with those of Preston et al. (10) for the  
60

1  
2  
3 same countries uncovered only small differences, except among men in the USA (our  
4 estimate was 0.56 years lower) and women in the UK (our estimate was 0.29 years lower)  
5  
6 (see Appendix Table S3). Given that approximately the same methodology was used to  
7  
8 estimate the OAMFs, the observed differences are most likely due to the use of different  
9  
10 obesity prevalence and RRs data. Preston used prevalence data from national representative  
11  
12 surveys and RRs from the Prospective Studies collaboration (14).  
13  
14  
15  
16

17  
18 To further evaluate our observed PGLE levels, we compared them with own PGLE  
19  
20 estimates for smoking and alcohol (27). Our PGLE estimates for smoking were 2.38 years for  
21  
22 men and 1.00 year for women in Western Europe, and 3.82 years for men and 0.67 years for  
23  
24 women in CEE. Our PGLE estimates for alcohol were 0.90 years for men and 0.44 years for  
25  
26 women in Western Europe, and 2.15 years for men and 1.00 year for women in CEE (27).  
27  
28 Thus, obesity's impact on life expectancy lies between that of smoking and alcohol, and can  
29  
30 be considered significant.  
31  
32  
33  
34  
35

36  
37 In our study, we found that PGLE due to obesity was increasing, but that this trend  
38  
39 differed across countries and between the sexes. This overall trend can be explained by the  
40  
41 general increase in obesity prevalence in European countries (see Appendix Figure S3) (13)  
42  
43 and the resulting growth in the burden of obesity (3), which is also reflected in the OAMFs  
44  
45 (Figure 1, Figure S1) in these countries.  
46  
47  
48

49  
50 At the same time, parts of the observed variation in the increase in PGLE estimates  
51  
52 across the USA, Western Europe, and CEE and between the sexes reflect differences in the  
53  
54 onset, the development, and the impact of the obesity epidemic in these countries and in  
55  
56 men and women. Across the countries studied, the absolute increase in PGLE was largest  
57  
58 among women and second-largest among men in the USA. This pattern is in line with  
59  
60

1  
2  
3 evidence showing that between 1980 and 2008, obesity increased much more in the USA  
4  
5 than in Europe (1, 28). This rapid progression of the obesity epidemic in the USA and its large  
6  
7 impact on life expectancy has been attributed to an increasingly obesogenic environment  
8  
9 caused by factors such as changes in food preparation and processes that promote the  
10  
11 consumption of calorically dense foods, and a pronounced decrease in physical activity levels  
12  
13 (29). The obesity epidemic has progressed more slowly in Western Europe than in the USA  
14  
15 (1, 13). However, obesity levels in countries like the UK and Ireland are rapidly approaching  
16  
17 those in the USA (30), as our PGLLE estimates also show.  
18  
19  
20  
21  
22

23  
24 In the CEE countries, the PGLLE trends track the evolution of the obesity epidemic in  
25  
26 that region (see Appendix Figure S3). Obesity levels have been higher in CEE than in Western  
27  
28 Europe since 1980 (31, 32), which suggests that the epidemic started earlier in CEE. As a  
29  
30 result of this earlier onset, the impact of obesity (as expressed in terms of OAMF and PGLLE)  
31  
32 in the 1970s and 1980s was at times even greater in CEE than in the USA, especially among  
33  
34 women. While there are many potential explanations for this early onset of the obesity  
35  
36 epidemic in CEE, the available data indicate that the main factors were the relatively high  
37  
38 total energy supply and energy intake in CEE in those years (33).  
39  
40  
41  
42  
43

44  
45 The overall progress of the obesity epidemic was lower in CEE than in Western  
46  
47 Europe, and the increase was not constant (1). Indeed, in CEE, increases in obesity  
48  
49 prevalence (1, 34), OAMFs, and PGLLE stagnated in the 1980-2008 period, more pronounced  
50  
51 in the 1990s (1, 34). This pattern could be explained by the decrease in energy supplies at  
52  
53 the beginning of the 1990s in CEE (31) resulting from the dramatic economic and political  
54  
55 changes in those countries (1, 31, 34). Among CEE women, the increase in obesity starting in  
56  
57 the 1990s was smaller than it was in the previous period, and was smaller than it was among  
58  
59  
60



1  
2  
3 CEE men. The lower risk of obesity observed among women than among men with low  
4  
5 socioeconomic status (SES) in low-income countries (35) may explain this difference.  
6  
7

8  
9 In Western Europe, a stagnation in PGLE levels was observed among women in  
10  
11 Denmark and Switzerland after 1995. This finding seems to be in line with studies reporting a  
12  
13 levelling-off of mean BMI since the 1990s (36); and in specific sub-populations, such as  
14  
15 adults with high SES in regions within Switzerland, Italy, France, and Finland (31). Although  
16  
17 dietary and physical activity information is spreading equally across socioeconomic groups,  
18  
19 those with higher SES have a greater ability and capacity to adopt a healthier dietary and  
20  
21 physical activity pattern (37). In addition, it appears that higher SES women in particular are  
22  
23 more health-conscious, have healthier food habits, and are more prone to follow nutritional  
24  
25 recommendations (38) as they are under greater social pressure to be thin (39). Similarly,  
26  
27 countries with higher income levels and lower levels of inequality (40), like Switzerland and  
28  
29 Denmark, tend to have lower obesity levels, especially among women.  
30  
31  
32  
33  
34  
35

36  
37 When we considered the impact of obesity on life expectancy in the 26 European  
38  
39 countries, we found that without obesity, the increase in  $e_0$  between 1975 and 2012 would  
40  
41 have been, on average, 0.78 years higher among men and 0.30 years higher among women.  
42  
43 These figures account for approximately 10% of the average change in  $e_0$  between 1975 and  
44  
45 2012 among men, and 5% among women. It is therefore clear that the impact of obesity on  
46  
47 changes in  $e_0$  should not be ignored. Moreover, the impact of obesity on life expectancy  
48  
49 trends is likely to increase, given that this impact is already substantially greater in the USA  
50  
51 (13% among men and 15% among women), and that obesity prevalence is still increasing  
52  
53 rapidly in most European countries (see Appendix Figure S3).  
54  
55  
56  
57  
58  
59

## 60 **Conclusion and implications**

1  
2  
3 Obesity was proven to have an impact on both life expectancy levels and trends in  
4 Europe. The observed differences in the increase in the impact of obesity across countries  
5 and between the sexes reflect differences in the onset and the progression of the obesity  
6 epidemic, and can be linked to contextual factors (economic conditions, obesogenic  
7 environment, energy supplies), as well as to differences in people's ability and capacity to  
8 adopt healthier lifestyles.  
9  
10  
11  
12  
13  
14  
15  
16  
17

18 It is likely that in the future obesity will have a larger impact on mortality and life  
19 expectancy in Europe, as obesity continues to increase in the majority of countries. It is  
20 therefore crucial that effective public health initiatives are undertaken to tackle the obesity  
21 epidemic and its effects on public health. Such initiatives should address the multifactorial  
22 and complex obesity aetiology; the clear differences between countries and the sexes; as  
23 well as the factors underlying these differences, such as contextual factors and differences in  
24 individuals' ability and capacity to adopt healthier lifestyles.  
25  
26  
27  
28  
29  
30  
31  
32  
33  
34  
35  
36  
37  
38  
39  
40  
41  
42  
43  
44  
45  
46  
47  
48  
49  
50  
51  
52  
53  
54  
55  
56  
57  
58  
59  
60

### **Funding**

This work was supported by the Netherlands Organisation for Scientific Research (NWO) in connection with the research programme “Smoking, alcohol, and obesity, ingredients for improved and robust mortality projections, grant no. 452-13-001; see [www.futuremortality.com](http://www.futuremortality.com).

### **Conflict of Interest**

None declared.

### **Author contribution**

N.Vidra contributed to the conception and design of the work; to the acquisition, analysis, and interpretation of data for the work; drafted and revised the work critically for important intellectual content; approved the final version of the work to be published and agrees to be accountable for all aspects of the work in ensuring that questions related to the accuracy or integrity of any part of the work are appropriately investigated and resolved.

S. Trias-Llimós contributed to the analysis, and interpretation of data for the work; revised it critically for important intellectual content; approved the final version of the work to be

1  
2  
3 published and agrees to be accountable for all aspects of the work in ensuring that questions  
4  
5 related to the accuracy or integrity of any part of the work are appropriately investigated  
6  
7 and resolved.  
8  
9

10  
11 F. Janssen contributed to the conception and design of the work; to the interpretation of  
12  
13 data for the work; revised the work critically for important intellectual content; approved  
14  
15 the final version of the work to be published and agrees to be accountable for all aspects of  
16  
17 the work in ensuring that questions related to the accuracy or integrity of any part of the  
18  
19 work are appropriately investigated and resolved.  
20  
21  
22

#### 23 24 25 **Data statement**

26  
27  
28 Obesity prevalence data can be obtained from NCD Risk Factor Collaboration (NCD-RisC)  
29  
30 ([www.ncdrisc.org](http://www.ncdrisc.org)).  
31  
32

33  
34 All-cause mortality and exposure population data can be obtained from the Human  
35  
36 Mortality Database (<http://www.mortality.org>).  
37  
38  
39

#### 40 41 **Acknowledgements**

42  
43  
44 The authors are grateful to Professor Majid Ezatti and Dr James Bentham (Faculty of  
45  
46 Medicine, School of Public Health at Imperial College London); Dr Gretchen A. Stevens  
47  
48 (World Health Organization); and the NCD Risk Factor Collaboration (NCD-RisC)  
49  
50 ([www.ncdrisc.org](http://www.ncdrisc.org)) for sharing the obesity data.  
51  
52

53  
54 This work is financed by the Netherlands Organisation for Scientific Research (NWO) as part  
55  
56 of the research programme "Smoking, alcohol, and obesity, ingredients for improved and  
57  
58 robust mortality projections, grant no. 452-13-001. See [www.futuremortality.com](http://www.futuremortality.com)  
59  
60

## References

1. Finucane MM, Stevens GA, Cowan MJ, Danaei G, Lin JK, Paciorek CJ, et al. National, regional, and global trends in body-mass index since 1980: systematic analysis of health examination surveys and epidemiological studies with 960 country-years and 9.1 million participants. *Lancet*. 2011 Feb 12;377(9765):557-67.
2. Overweight and obesity - BMI statistics [Internet].; 2017 []. Available from: [http://ec.europa.eu/eurostat/statistics-explained/index.php/Overweight\\_and\\_obesity\\_-\\_BMI\\_statistics](http://ec.europa.eu/eurostat/statistics-explained/index.php/Overweight_and_obesity_-_BMI_statistics).
3. WHO. The challenge of Obesity in the WHO European Region and the Strategies for Response: Summary. Copenhagen: World Health Organization, Regional Office for Europe; 2007.
4. Seidell JC. Prevalence and time trends of obesity in Europe. *Journal of endocrinological investigation*. 2002;25(10):816-22.
5. Eurostat. European Health Interview Survey - Almost 1 adult in 6 in the EU is considered obese - Share of obesity increases with age and decreases with education level. 2016.
6. Field AE, Coakley EH, Must A, Spadano JL, Laird N, Dietz WH, et al. Impact of overweight on the risk of developing common chronic diseases during a 10-year period. *Archives of Internal Medicine*. 2001 Jul 9;161(13):1581-6.
7. Global BMI Mortality C, Di Angelantonio E, Bhupathiraju S, Wormser D, Gao P, Kaptoge S, et al. Body-mass index and all-cause mortality: individual-participant-data meta-analysis of 239 prospective studies in four continents. *Lancet*. 2016 Aug 20;388(10046):776-86.
8. Alley DE, Lloyd J, Shardell M. Can obesity account for cross-national differences in life expectancy trends? In: Crimmins EM, Preston SH, Cohen B, editors. *International differences in mortality at older ages: Dimensions and sources, panel on understanding divergent trends in longevity in high-income countries*. Washington, DC: National Academies Press; 2011. p. 164-92.
9. Olshansky SJ, Passaro DJ, Hershov RC, Layden J, Carnes BA, Brody J, et al. A potential decline in life expectancy in the United States in the 21st century. *The New England Journal of Medicine*. 2005 Mar 17;352(11):1138-45.
10. Preston SH, Stokes A. Contribution of obesity to international differences in life expectancy. *American Journal of Public Health*. 2011 Nov;101(11):2137-43.
11. National Research Council. *The Role of Obesity*. In: Crimmins EM, Preston SH, Cohen B, editors. *Explaining Divergent Levels of Longevity in High-Income Countries*. Washington, DC: National Academies Press; 2011. p. 43-55.

12. Leon DA. Trends in European life expectancy: a salutary view. *International Journal of Epidemiology*. 2011 Apr;40(2):271-7.
13. NCD Risk Factor Collaboration. Trends in adult body-mass index in 200 countries from 1975 to 2014: a pooled analysis of 1698 population-based measurement studies with 19.2 million participants. *Lancet*. 2016 Apr 2;387(10026):1377-96.
14. Lobstein T, Leach RJ. Workpackage 7: Overweight and Obesity Report on data collection for overweight and obesity prevalence and related relative risks. 2010.
15. Global BMI Mortality Collaboration. Body-mass index and all-cause mortality: individual-participant-data meta-analysis of 239 prospective studies in four continents. *Lancet*. 2016 Aug 20;388(10046):776-86.
16. University of California, Berkeley (USA), and Max Planck Institute for Demographic Research (Germany). [Internet]. []. Available from: <http://www.mortality.org>.
17. Cleveland WS, Loader C. Smoothing by local regression: Principles and methods. In: Murray Hill: A&T Bell Laboratorie; 1995.
18. Rockhill B, Newman B, Weinberg C. Use and misuse of population attributable fractions. *American Journal of Public Health*. 1998 Jan;88(1):15-9.
19. Preston SH, Heuveline P, Guillot M. *Demography*. Malden, MA: Blackwell; 2001.
20. Census data [Internet].; 2011 []. Available from: <https://ec.europa.eu/CensusHub2/query.do?step=selectHyperCube&qhc=false>.
21. Flegal KM, Panagiotou OA, Graubard BI. Estimating population attributable fractions to quantify the health burden of obesity. *Annals of Epidemiology*. 2015 Mar;25(3):201-7.
22. Flegal KM, Graubard BI, Williamson DF, Gail MH. Excess deaths associated with underweight, overweight, and obesity. *JAMA*. 2005 Apr 20;293(15):1861-7.
23. Mehta NK, Chang VW. Secular declines in the association between obesity and mortality in the United States. *Population and Development Review*. 2011;37(3):435-51.
24. Yu Y. Reexamining the declining effect of age on mortality differentials associated with excess body mass: evidence of cohort distortions in the United States. *American Journal of Public Health*. 2012 May;102(5):915-22.
25. Yu Y. The Changing Body Mass-Mortality Association in the United States: Evidence of Sex-Specific Cohort Trends from Three National Health and Nutrition Examination Surveys. *Biodemography and Social Biology*. 2016;62(2):143-63.
26. Vidra N, Bijlsma MJ, Janssen F. Impact of Different Estimation Methods on Obesity-Attributable Mortality Levels and Trends: The Case of The Netherlands. *Int J Environ Res Public Health*. 2018 Sep 29;15(10):10.3390/ijerph15102146.
27. Trias-Llimós S, Kunst AE, Jasilionis D, Janssen F. The contribution of alcohol to the East-West life expectancy gap in Europe from 1990 onward. *European Journal of Epidemiology*. 2017;47(3):731-9.

- 1  
2  
3 28. Doak CM, Wijnhoven TM, Schokker DF, Visscher TL, Seidell JC. Age standardization in mapping  
4 adult overweight and obesity trends in the WHO European Region. *Obesity Reviews*. 2012  
5 Feb;13(2):174-91.  
6  
7  
8 29. Cutler DM, Glaeser EL, Shapiro JM. Why Have Americans Become More Obese? *The Journal of*  
9 *Economic Perspectives*. 2003;17(1):93-118.  
10  
11 30. Obesity update 2012 [Internet].; 2012 []. Available from: [http://www.oecd.org/els/health-](http://www.oecd.org/els/health-systems/49716427.pdf)  
12 [systems/49716427.pdf](http://www.oecd.org/els/health-systems/49716427.pdf).  
13  
14 31. Silventoinen K, Sans S, Tolonen H, Monterde D, Kuulasmaa K, Kesteloot H, et al. Trends in obesity  
15 and energy supply in the WHO MONICA Project. *International Journal of Obesity and Related*  
16 *Metabolic Disorders*. 2004 May;28(5):710-8.  
17  
18 32. Malik VS, Willett WC, Hu FB. Global obesity: trends, risk factors and policy implications. *Nature*  
19 *reviews Endocrinology*. 2013 Jan;9(1):13-27.  
20  
21 33. Zatonski WA, Bhala N. Changing trends of diseases in Eastern Europe: closing the gap. *Public*  
22 *Health*. 2012 Mar;126(3):248-52.  
23  
24 34. Bray GA, Bouchard C. *Handbook of Obesity: Etiology and Pathophysiology*. second ed. Boca  
25 Raton: CRC Press Taylor & Francis Group; 2003.  
26  
27 35. Monteiro CA, Conde WL, Lu B, Popkin BM. Obesity and inequities in health in the developing  
28 world. *International Journal of Obesity*. 2004 Sep;28(9):1181-6.  
29  
30 36. Wilkins E, Wilson L, Wickramasinghe K, Bhatnagar P, Leal J, Luengo-Fernandez R, et al. *European*  
31 *Cardiovascular Disease Statistics 2017*. Brussels: European Heart Network; 2017.  
32  
33 37. Robertson A, Lobstein T, Knai C. *Obesity and socio-economic groups in Europe: Evidence review*  
34 *and implications for action*. Brussels: European Commission. 2007.  
35  
36 38. Fagerli RA, Wandel M. Gender differences in opinions and practices with regard to a "healthy  
37 diet". *Appetite*. 1999 Apr;32(2):171-90.  
38  
39 39. Psaltopoulou T, Hatzis G, Papageorgiou N, Androulakis E, Briasoulis A, Tousoulis D. Socioeconomic  
40 status and risk factors for cardiovascular disease: Impact of dietary mediators. *Hellenic Journal of*  
41 *Cardiology*. 2017 Jan - Feb;58(1):32-42.  
42  
43 40. WHO. *Obesity and inequities. Guidance for addressing inequities in overweight and obesity*.  
44 Copenhagen: World Health Organization, Regional Office for Europe; 2014.  
45  
46  
47  
48  
49  
50  
51  
52

### Figure legends

53  
54  
55 **Figure 1: Age-standardised obesity-attributable mortality fractions in 26 European countries (by 5**  
56 **regions) and USA, 1975-2014, 18-100 years**  
57

### Footnote:

58  
59 Countries within the same region are presented with the same colour  
60

1  
2  
3 **Central Europe:** Czech Republic, Hungary, Poland, Slovakia

4  
5 **Eastern Europe:** Belarus, Estonia, Ukraine, Latvia, Lithuania, Russian Federation

6  
7 **Northern Europe:** Denmark, Finland, Iceland, Norway, Sweden

8  
9 **Southern Europe:** Italy, Portugal, Spain

10  
11 **Western Europe:** Austria, Belgium, France, Ireland, Luxembourg, Netherlands, Switzerland, United Kingdom

12  
13 **USA:** United States of America

14  
15  
16 **Figure 2: Potential gains in life expectancy at birth (PGL) if obesity-attributable mortality was**  
17 **eliminated, in 26 European countries (differentiating Western and Central Eastern Europe) and the**  
18 **USA, 1975-2012, 18-100 years**

19  
20  
21  
22  
23 **Footnote:**

24  
25 Countries within the same region are presented with the same colour

26  
27 **Central Eastern Europe:** Belarus, Czech Republic, Estonia, Hungary, Latvia, Lithuania, Poland, Russian Federation, Slovakia, Ukraine

28  
29 **Western Europe:** Austria, Belgium, Denmark, Finland, France, Iceland, Ireland, Italy, Luxembourg, Netherlands, Norway, Portugal, Spain,  
30  
31 Sweden, Switzerland, United Kingdom

32  
33 **USA:** United States of America

34  
35 **Figure 3: Average annual increase (%) in potential gains in life expectancy due to obesity in**  
36 **26 European countries and the USA between 1975-2012, in men**

37  
38  
39  
40 **Figure 4: Average annual increase (%) in potential gains in life expectancy due to obesity in**  
41 **26 European countries and the USA between 1975-2012, in women**



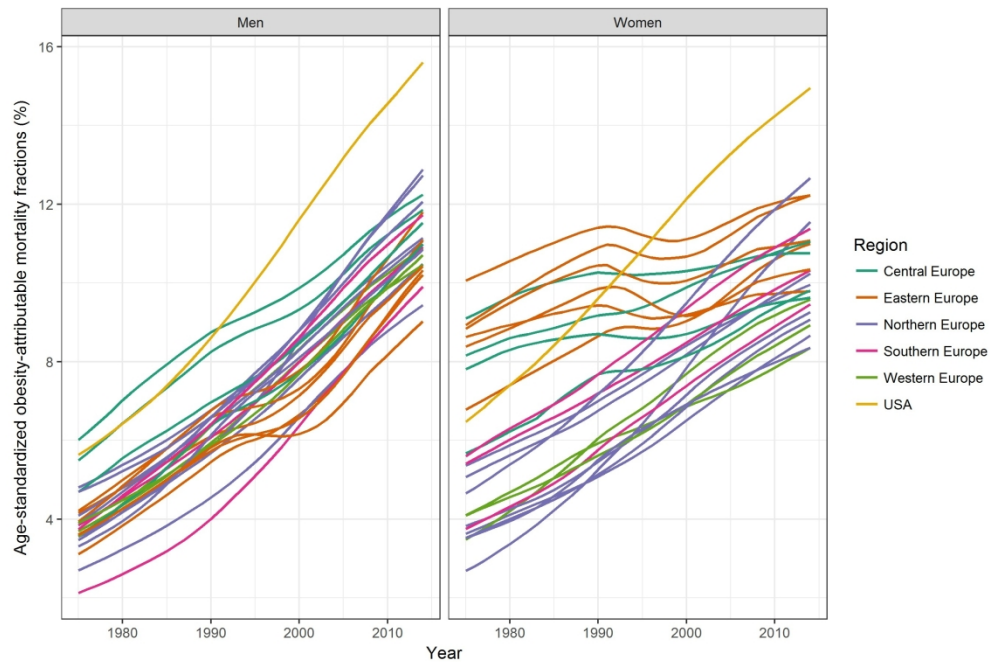

Figure 1: Age-standardised obesity-attributable mortality fractions in 26 European countries (by 5 regions) and USA, 1975-2014, 18-100 years. Footnote: Countries within the same region are presented with the same colour

Central Europe: Czech Republic, Hungary, Poland, Slovakia  
 Eastern Europe: Belarus, Estonia, Ukraine, Latvia, Lithuania, Russian Federation  
 Northern Europe: Denmark, Finland, Iceland, Norway, Sweden  
 Southern Europe: Italy, Portugal, Spain  
 Western Europe: Austria, Belgium, France, Ireland, Luxembourg, Netherlands, Switzerland, United Kingdom  
 USA: United States of America

228x152mm (300 x 300 DPI)

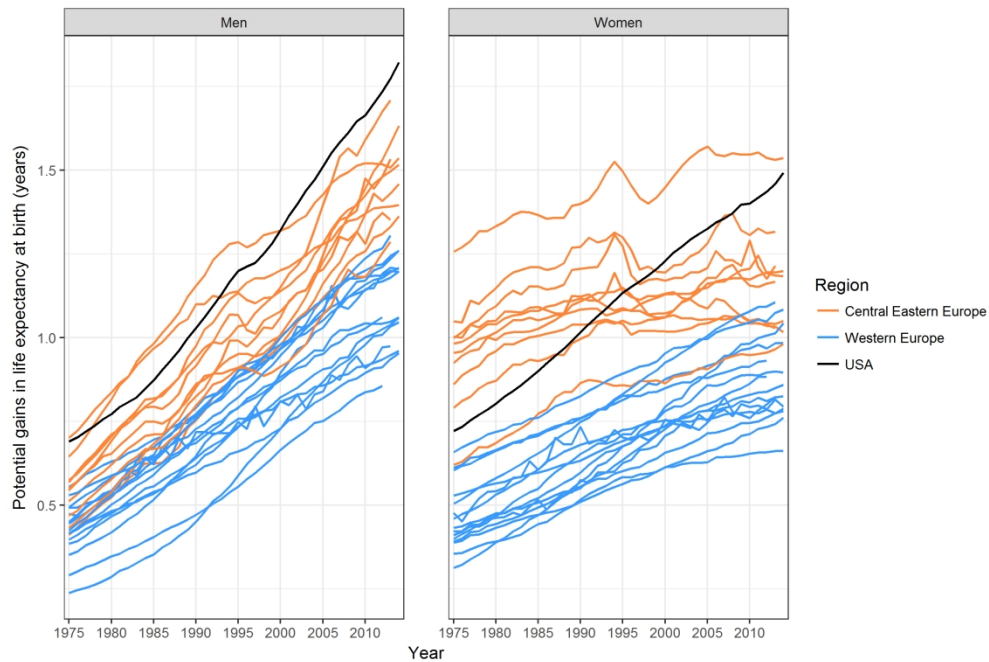

Figure 2: Potential gains in life expectancy at birth (PGLE) if obesity-attributable mortality was eliminated, in 26 European countries (differentiating Western and Central Eastern Europe) and the USA, 1975-2012, 18-100 years

Footnote: Countries within the same region are presented with the same colour  
 Central Eastern Europe: Belarus, Czech Republic, Estonia, Hungary, Latvia, Lithuania, Poland, Russian Federation, Slovakia, Ukraine  
 Western Europe: Austria, Belgium, Denmark, Finland, France, Iceland, Ireland, Italy, Luxembourg, Netherlands, Norway, Portugal, Spain, Sweden, Switzerland, United Kingdom  
 USA: United States of America

1  
2  
3  
4  
5  
6  
7  
8  
9  
10  
11  
12  
13  
14  
15  
16  
17  
18  
19  
20  
21  
22  
23  
24  
25  
26  
27  
28  
29  
30  
31  
32  
33  
34  
35  
36  
37  
38  
39  
40  
41  
42  
43  
44  
45  
46  
47  
48  
49  
50  
51  
52  
53  
54  
55  
56  
57  
58  
59  
60

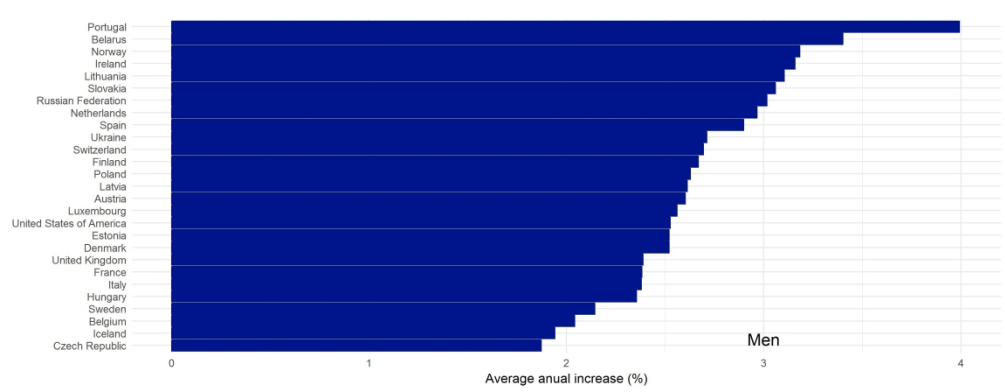

Figure 3: Average annual increase (%) in potential gains in life expectancy due to obesity in 26 European countries and the USA between 1975-2012, in men

1244x472mm (72 x 72 DPI)

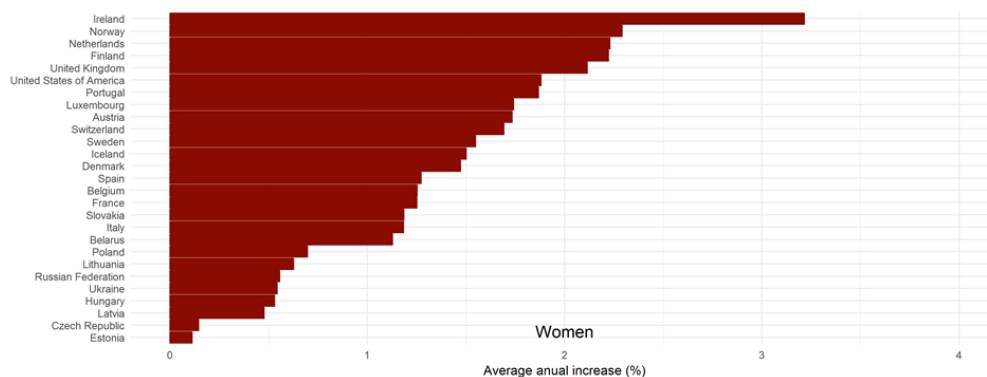

Figure 4: Average annual increase (%) in potential gains in life expectancy due to obesity in 26 European countries and the USA between 1975-2012, in women

**Supplementary material****Table S1: Age-and sex-specific RRs of dying from obesity from the Dynamo project (Lobstein et al. 2010)**

| Age           | RR     |       |
|---------------|--------|-------|
|               | Men    | Women |
| <b>&lt;50</b> | 1.55   | 1.5   |
| <b>50-59</b>  | 1.539  | 1.49  |
| <b>60-69</b>  | 1.5225 | 1.475 |
| <b>70+</b>    | 1.495  | 1.45  |

**Reference group for the RRs: normal weight (18-24.9 kg/m<sup>2</sup>)**

**Figure S1: Age-standardised obesity-attributable mortality fractions in 26 European countries, grouped by 5 regions and USA, 1975-2014, 18-100 years**

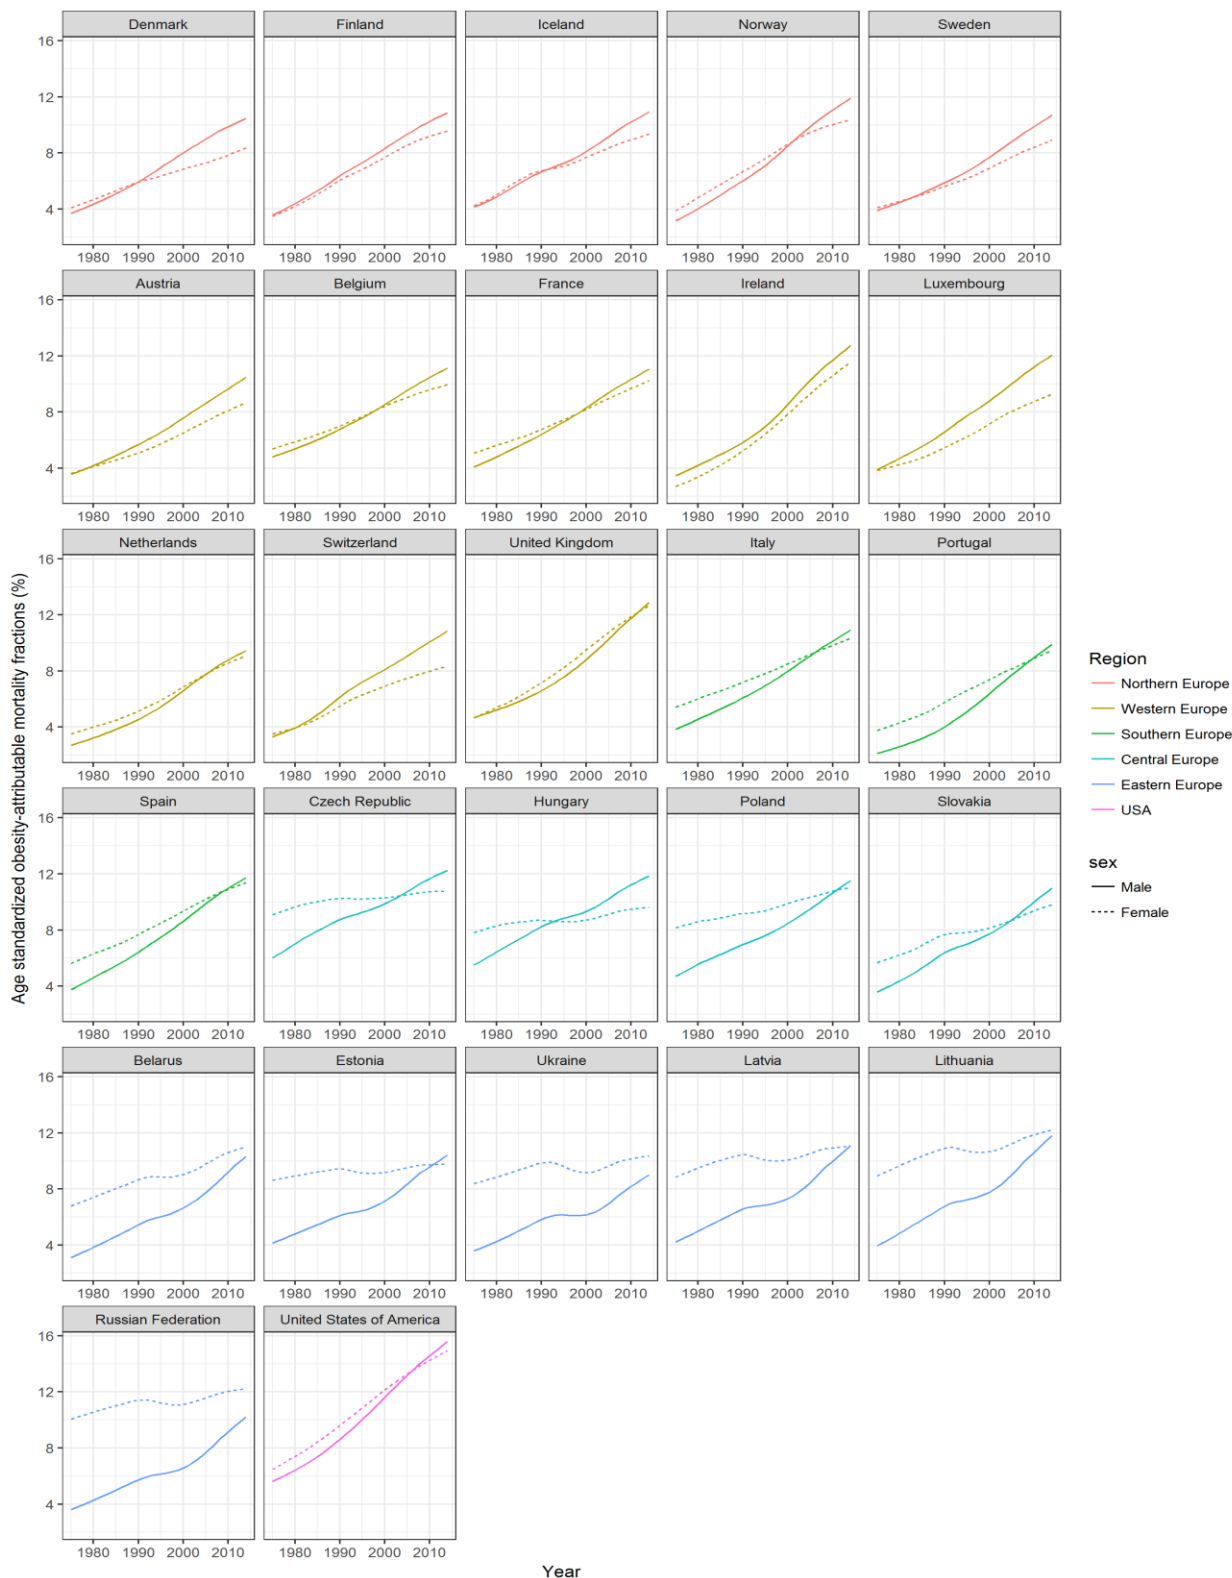

Countries within the same region are presented with the same colour

**Figure S2: Potential gains in life expectancy at birth (PGL) if obesity-attributable mortality was eliminated, in 26 European countries, grouped by 2 regions and USA, 1975-2012, 18-100 years**

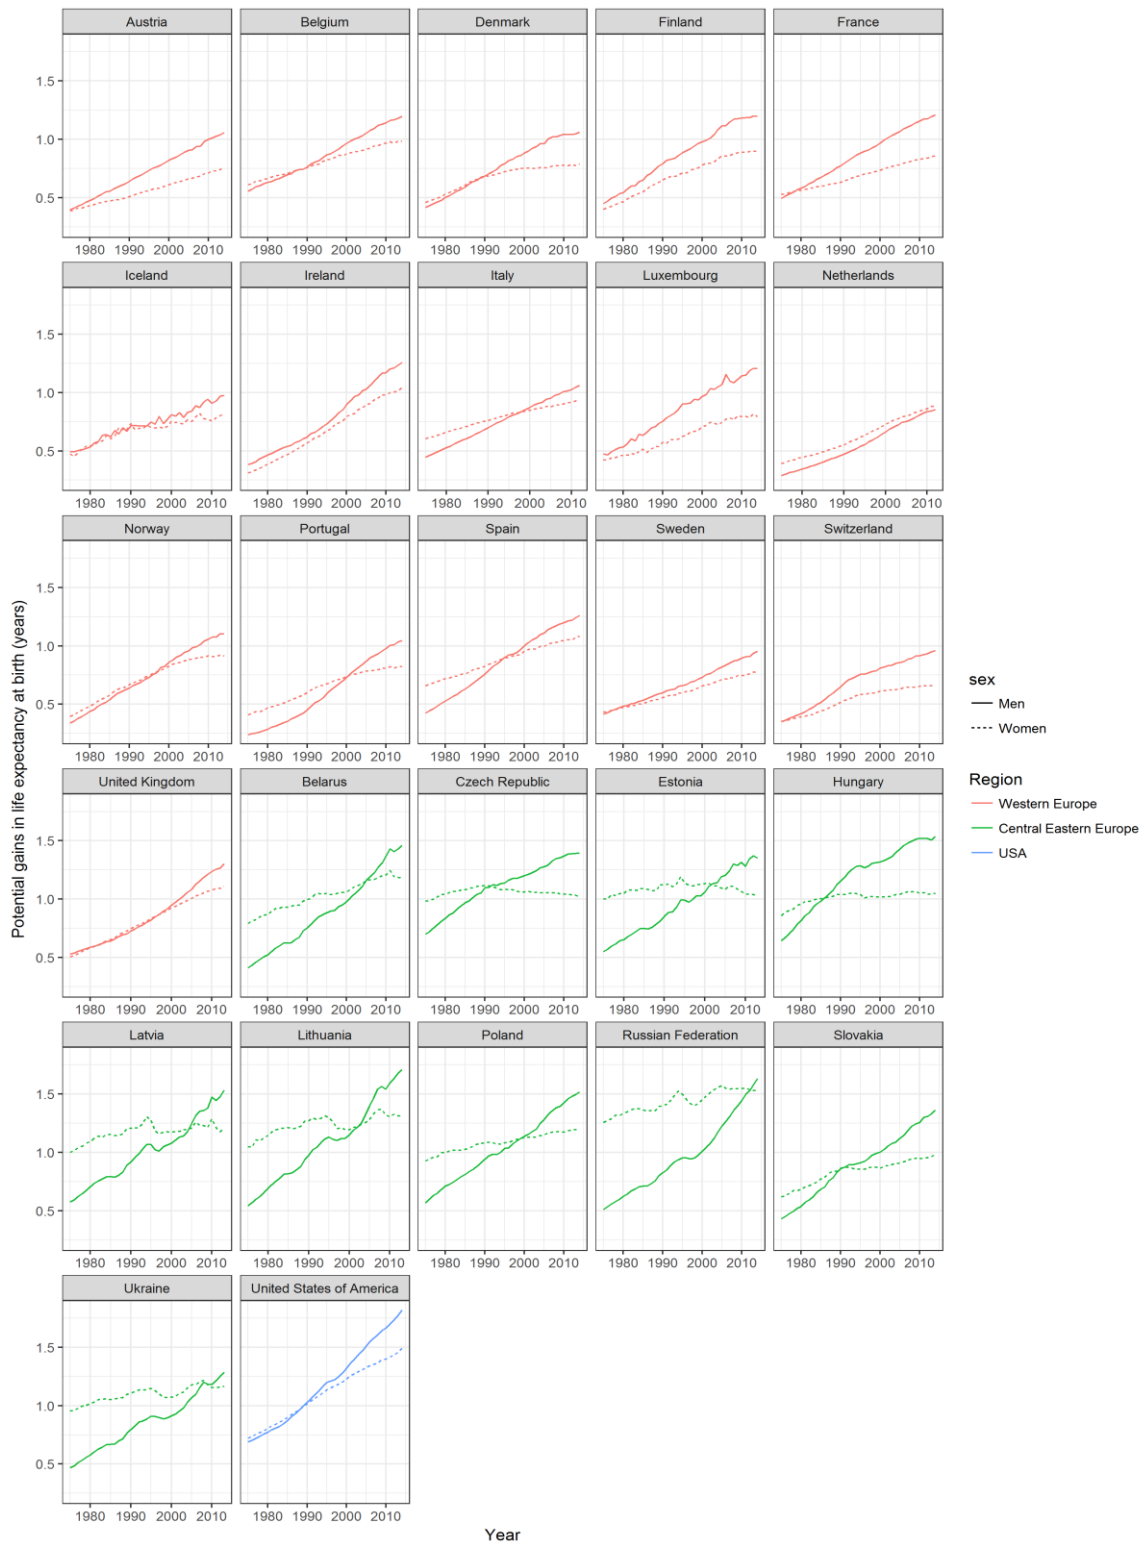

Countries within the same region are presented with the same colour

**Table S2: Potential gains in life expectancy at birth (PGL) if obesity-attributable mortality was eliminated, in 26 European countries (differentiating Western and Central Eastern Europe) and the USA, in 1975 and 2012, 18-100 years**

| Country                             | PGL 1975    |             | PGL 2012    |             |
|-------------------------------------|-------------|-------------|-------------|-------------|
|                                     | Men         | Women       | Men         | Women       |
| <b>Central Eastern Europe (CEE)</b> |             |             |             |             |
| Belarus                             | 0.41        | 0.79        | 1.41        | 1.19        |
| Czech Republic                      | 0.70        | 0.98        | 1.39        | 1.03        |
| Estonia                             | 0.55        | 1.00        | 1.37        | 1.04        |
| Hungary                             | 0.64        | 0.86        | 1.52        | 1.04        |
| Latvia                              | 0.58        | 1.00        | 1.48        | 1.18        |
| Lithuania                           | 0.54        | 1.05        | 1.67        | 1.31        |
| Poland                              | 0.57        | 0.93        | 1.48        | 1.19        |
| Russian Federation                  | 0.51        | 1.26        | 1.53        | 1.54        |
| Slovakia                            | 0.43        | 0.62        | 1.31        | 0.96        |
| Ukraine                             | 0.47        | 0.95        | 1.25        | 1.16        |
| <b>Average CEE</b>                  | <b>0.54</b> | <b>0.94</b> | <b>1.44</b> | <b>1.16</b> |
| <b>Western Europe</b>               |             |             |             |             |
| Austria                             | 0.40        | 0.39        | 1.03        | 0.73        |
| Belgium                             | 0.55        | 0.61        | 1.17        | 0.97        |
| Denmark                             | 0.42        | 0.46        | 1.04        | 0.79        |
| France                              | 0.49        | 0.53        | 1.18        | 0.84        |
| Finland                             | 0.45        | 0.40        | 1.19        | 0.90        |
| Ireland                             | 0.38        | 0.31        | 1.21        | 1.01        |
| Iceland                             | 0.49        | 0.48        | 0.97        | 0.80        |
| Italy                               | 0.44        | 0.60        | 1.06        | 0.93        |
| Luxembourg                          | 0.47        | 0.42        | 1.19        | 0.79        |
| Netherlands                         | 0.29        | 0.39        | 0.86        | 0.88        |
| Norway                              | 0.34        | 0.39        | 1.07        | 0.91        |
| Portugal                            | 0.24        | 0.41        | 1.01        | 0.81        |
| Spain                               | 0.42        | 0.66        | 1.22        | 1.05        |
| Sweden                              | 0.42        | 0.43        | 0.91        | 0.76        |
| Switzerland                         | 0.35        | 0.35        | 0.93        | 0.66        |
| United Kingdom                      | 0.53        | 0.50        | 1.27        | 1.09        |
| <b>Average Western Europe</b>       | <b>0.41</b> | <b>0.48</b> | <b>1.08</b> | <b>0.86</b> |
| <b>USA</b>                          | <b>0.69</b> | <b>0.72</b> | <b>1.73</b> | <b>1.44</b> |
| <b>Average European countries</b>   | <b>0.46</b> | <b>0.64</b> | <b>1.22</b> | <b>0.98</b> |
| <b>Average all countries</b>        | <b>0.47</b> | <b>0.64</b> | <b>1.23</b> | <b>1.00</b> |



**Table S3: Potential gains in life expectancy at age 50 (PGL e50 2006) if obesity-attributable mortality was eliminated, own and Preston estimates, in the same countries studied, in 2006**

|                | PGLE e50 2006,<br>own estimates | PGLE e50 2006,<br>Preston's estimates | Difference |
|----------------|---------------------------------|---------------------------------------|------------|
| <b>Country</b> |                                 |                                       |            |
| <b>Men</b>     |                                 |                                       |            |
| Austria        | 0.81                            | 1.00                                  | -0.19      |
| Belgium        | 0.95                            | 0.98                                  | -0.03      |
| Czech Republic | 1.14                            | 1.34                                  | -0.20      |
| Denmark        | 0.88                            | 0.82                                  | 0.06       |
| France         | 0.94                            | 0.99                                  | -0.05      |
| Italy          | 0.88                            | 0.90                                  | -0.02      |
| Netherlands    | 0.69                            | 0.73                                  | -0.04      |
| Poland         | 1.14                            | 1.37                                  | -0.23      |
| Spain          | 1.02                            | 1.15                                  | -0.13      |
| Sweden         | 0.75                            | 0.72                                  | 0.03       |
| Switzerland    | 0.77                            | 0.79                                  | -0.02      |
| United Kingdom | 0.99                            | 1.34                                  | -0.35      |
| USA            | 1.29                            | 1.85                                  | -0.56      |
| <b>Women</b>   |                                 |                                       |            |
| Austria        | 0.62                            | 0.71                                  | -0.09      |
| Belgium        | 0.86                            | 0.73                                  | 0.13       |
| Czech Republic | 0.87                            | 1.01                                  | -0.14      |
| Denmark        | 0.71                            | 0.62                                  | 0.09       |
| France         | 0.72                            | 0.52                                  | 0.2        |
| Italy          | 0.84                            | 0.57                                  | 0.27       |
| Netherlands    | 0.76                            | 0.69                                  | 0.07       |
| Poland         | 1.08                            | 1.19                                  | -0.11      |
| Spain          | 0.95                            | 0.87                                  | 0.08       |
| Sweden         | 0.67                            | 0.63                                  | 0.04       |
| Switzerland    | 0.59                            | 0.50                                  | 0.09       |
| United Kingdom | 0.94                            | 1.23                                  | -0.29      |
| USA            | 1.18                            | 1.28                                  | -0.10      |

**Figure S3: Age-standardised obesity prevalence in 26 European countries, grouped by 2 regions and USA, 1975-2012, 18-100 years**

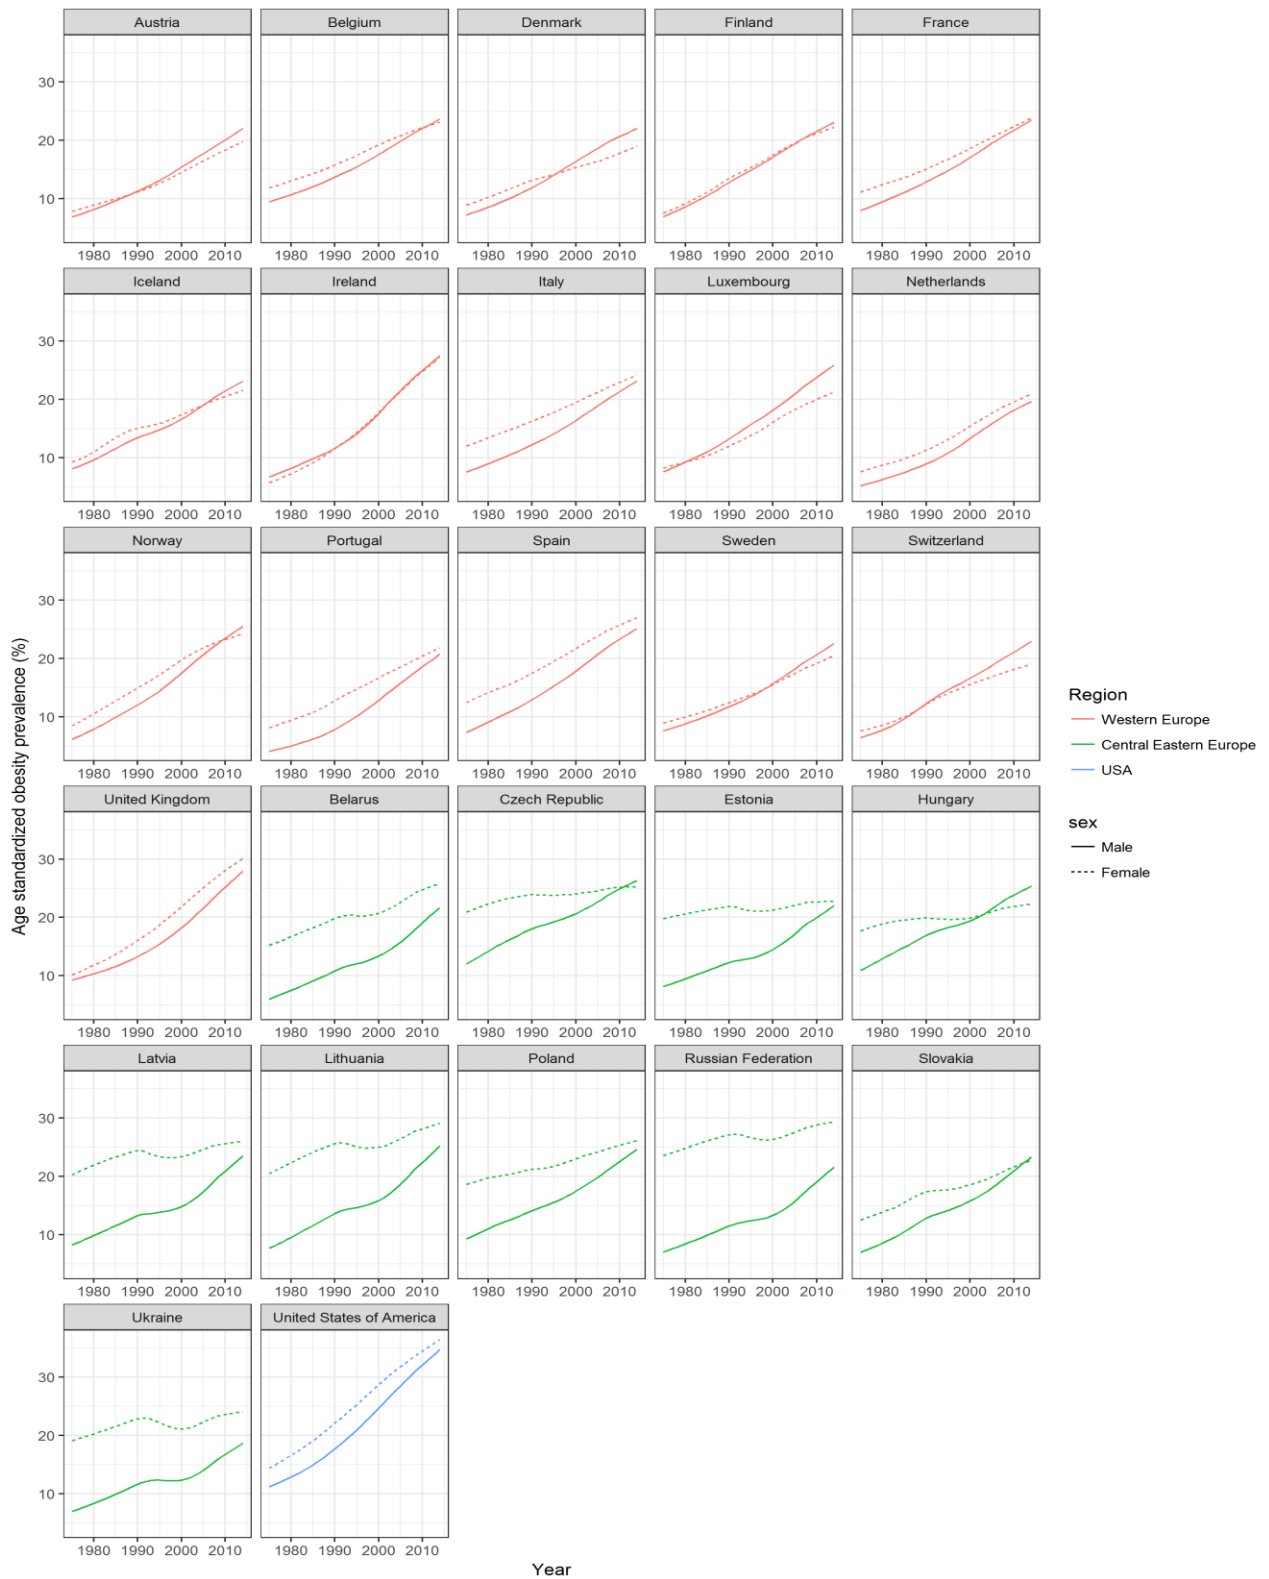

Countries within the same region are presented with the same colour

# BMJ Open

## Impact of obesity on life expectancy among different European countries, 1975-2012

|                                 |                                                                                                                                                                                                                                                                                                  |
|---------------------------------|--------------------------------------------------------------------------------------------------------------------------------------------------------------------------------------------------------------------------------------------------------------------------------------------------|
| Journal:                        | <i>BMJ Open</i>                                                                                                                                                                                                                                                                                  |
| Manuscript ID                   | bmjopen-2018-028086.R1                                                                                                                                                                                                                                                                           |
| Article Type:                   | Research                                                                                                                                                                                                                                                                                         |
| Date Submitted by the Author:   | 28-Apr-2019                                                                                                                                                                                                                                                                                      |
| Complete List of Authors:       | Vidra, Nikoletta; Population Research Centre, Faculty of Spatial Sciences, Demography<br>Trias-Llimós, Sergi; University of Groningen, Population Research Centre<br>Janssen, Fanny; University of Groningen, Population Research Centre;<br>Nederlands Interdisciplinair Demografisch Instituut |
| <b>Primary Subject Heading</b>: | Epidemiology                                                                                                                                                                                                                                                                                     |
| Secondary Subject Heading:      | Public health, Nutrition and metabolism                                                                                                                                                                                                                                                          |
| Keywords:                       | EPIDEMIOLOGY, NUTRITION & DIETETICS, PUBLIC HEALTH                                                                                                                                                                                                                                               |
|                                 |                                                                                                                                                                                                                                                                                                  |

SCHOLARONE™  
Manuscripts

1  
2  
3 **1 Impact of obesity on life expectancy among different European countries, 1975-2012**  
4

5  
6 **2** Nikoletta Vidra<sup>1</sup>, Sergi Trias-Llimós<sup>1</sup>, Fanny Janssen<sup>1,2</sup>  
7

8  
9 **3** <sup>1</sup> Population Research Centre, Faculty of Spatial Sciences, University of Groningen, Landleven  
10  
11  
12 **4** 1, 9747 AD Groningen, The Netherlands.  
13

14  
15 **5** <sup>2</sup> Netherlands Interdisciplinary Demographic Institute, Lange Houtstraat 19, 2511 CV The  
16  
17  
18 **6** Hague, The Netherlands.  
19

20  
21  
22  
23  
24 **8** Corresponding author: Nikoletta Vidra, Population Research Centre, Faculty of Spatial  
25  
26  
27 **9** Sciences, University of Groningen, PO Box 800, 9700 AV Groningen, The Netherlands. Tel:  
28  
29  
30 **10** 0031 (0) 50 363 86 52; e-mail: n.vidra@rug.nl  
31

32 **11**

33  
34  
35 **12**

36  
37  
38 **13**

39  
40  
41  
42 **14**

43  
44  
45 **15**

46  
47  
48 **16**

49  
50  
51  
52 **17**

53  
54  
55 **18**

56  
57  
58 **19** **Word count: 3669 words**  
59  
60

1  
2  
3 20  
4  
5  
6 21 **Abstract**  
7  
8  
9 22 **Objective:** This study assesses the impact of obesity on life expectancy for 26 European  
10  
11  
12 23 national populations and the USA over the 1975-2012 period.  
13  
14  
15 24 **Design:** Secondary analysis of population-level obesity and mortality data.  
16  
17  
18 25 **Setting:** European countries, namely Austria, Belarus, Belgium, the Czech Republic,  
19  
20  
21 26 Denmark, Estonia, Finland, France, Hungary, Iceland, Ireland, Italy, Latvia, Lithuania,  
22  
23 27 Luxembourg, the Netherlands, Norway, Poland, Portugal, the Russian Federation, Slovakia,  
24  
25 28 Spain, Sweden, Switzerland, Ukraine, the United Kingdom (UK); and the USA.  
26  
27  
28 29 **Participants:** National populations aged 18–100 years, by sex.  
29  
30  
31 30 **Measurements:** Using data by age and sex, we calculated obesity-attributable mortality by  
32  
33  
34 31 multiplying all-cause mortality (Human Mortality Database) with obesity-attributable  
35  
36 32 mortality fractions (OAMFs). OAMFs were obtained by applying the weighted-sum method  
37  
38 33 to obesity prevalence data (NCD Risk Factor Collaboration) and European Relative Risks (RRs)  
39  
40 34 (DYNAMO). We estimated potential gains in life expectancy at birth (PGLE) by eliminating  
41  
42 35 obesity-attributable mortality from all-cause mortality using associated single-decrement life  
43  
44 36 tables.  
45  
46  
47  
48  
49 37 **Results:** In the 26 European countries in 2012, PGLE due to obesity ranged from 0.86 to 1.67  
50  
51 38 years among men, and from 0.66 to 1.54 years among women. In all countries, PGLE  
52  
53 39 increased over time, with an average annual increase of 2.68% among men and 1.33% and  
54  
55 40 among women. Among women in Denmark, Switzerland, and Central and Eastern European  
56  
57 41 countries, the increase in PGLE levelled off after 1995. Without obesity, the average increase  
58  
59  
60

1  
2  
3 42 in life expectancy between 1975 and 2012 would have been 0.78 years higher among men  
4  
5 43 and 0.30 years higher among women.  
6  
7  
8

9 44 **Conclusions:** Obesity was proven to have an impact on both life expectancy levels and  
10  
11 45 trends in Europe. The differences found in this impact between countries and the sexes can  
12  
13 46 be linked to contextual factors, as well as to differences in people's ability and capacity to  
14  
15 47 adopt healthier lifestyles.  
16  
17  
18

19 48 **Keywords: Obesity, life expectancy, Europe, USA**  
20  
21  
22

## 23 49 **Article Summary**

### 24 25 50 **Strengths and limitations of the study**

- 26  
27 51 • This is the first study to assess the impact of obesity on life expectancy at birth over  
28  
29 52 time, and we do so here for 26 European countries and the USA.  
30  
31  
32  
33  
34 53 • We used recent long-term comparable data on obesity prevalence based on  
35  
36 54 population-based measurement studies, and European relative risks of dying from obesity by  
37  
38 55 age and sex from a recent meta-analysis.  
39  
40  
41  
42 56 • Because of remaining data limitations regarding prevalence and relative risks, we had  
43  
44 57 to use a fairly simple – albeit common applied - methodology to estimate obesity-  
45  
46 58 attributable mortality.  
47  
48  
49

50  
51 59  
52  
53  
54 60  
55  
56  
57 61  
58  
59  
60 62

## 63 Introduction

64 Obesity is a global epidemic (1), with Europe currently ranking second worldwide after the  
65 USA (2). Over the last 20 years obesity prevalence has increased threefold in Europe(3),  
66 although not uniformly across countries (4). Estimates for 2014 indicate that obesity varied  
67 threefold across European countries, ranging from a low of 9% in Romania to a high of 26%  
68 in Malta (5). Obesity constitutes a serious health burden at the individual and population  
69 levels because it is associated with an increased risk of morbidity (6), and mortality (7).  
70 However, the potential impact of the increase in obesity on life expectancy trends remains  
71 largely unknown (8).

72 The few existing studies that assessed the impact of obesity on life expectancy at the  
73 population level provided estimates at one specific point in time only (9, 10). Olshansky et al.  
74 found that if obesity was eliminated, life expectancy at birth ( $e_0$ ) in the USA in 2000 would  
75 be 0.21 to 1.08 years higher, depending on gender and ethnicity (9). Preston et al. (10)  
76 estimated for 16 low-mortality countries in 2006 that the reduction in life expectancy at age  
77 50 ( $e_{50}$ ) due to obesity was greatest in the USA, at more than 1.5 years; and ranged from  
78 0.50 to 1.19 years for women and from 0.72 to 1.37 years for men in European countries.

79 Gaining insight into the impact of obesity on trends in life expectancy is especially  
80 relevant (11) given the marked differences in life expectancy trends across Europe (12). In  
81 Western European countries,  $e_0$  has been increasing steadily, and has risen six to eight years  
82 since 1970. But in Central and Eastern Europe (CEE),  $e_0$  stagnated or even declined between  
83 the 1970s and the 1980s, and did not start increasing again until the 1990s. There are also  
84 marked differences in  $e_0$  trends between individual European countries (12).

1  
2  
3 85 In light of these important differences between European countries in both obesity  
4  
5  
6 86 prevalence and life expectancy over time, our aim is to assess the impact of obesity on long-  
7  
8 87 term trends in life expectancy across a wide range of European countries.  
9

10  
11 88 Our sole focus is on the impact of obesity, given the significant health burden caused by  
12  
13  
14 89 obesity, the large body of literature on its impact, and the well-documented association of  
15  
16 90 obesity with mortality.  
17

## 19 91 **Data and Methods**

### 22 92 **Setting**

23  
24  
25 93 We studied the impact of obesity on life expectancy by sex over the 1975-2012 period in 26  
26  
27  
28 94 European countries: Austria, Belarus, Belgium, the Czech Republic, Denmark, Estonia,  
29  
30  
31 95 Finland, France, Hungary, Iceland, Ireland, Italy, Latvia, Lithuania, Luxembourg, the  
32  
33  
34 96 Netherlands, Norway, Poland, Portugal, the Russian Federation, Slovakia, Spain, Sweden,  
35  
36 97 Switzerland, Ukraine, the United Kingdom (UK); and the USA as a comparison country (10).  
37

### 38 98 **Data**

39  
40  
41 99 Long-term comparable obesity prevalence data ( $BMI \geq 30 \text{ kg/m}^2$ ) by country, sex, age (18-19,  
42  
43  
44 100 20-24, ..., 85+), and year (1975-2012), based on 1698 population-based measurement studies,  
45  
46 101 were obtained from the NCD Risk Factor Collaboration study (13). These validated data  
47  
48  
49 102 comprise the available measured height and weight data of 19.2 million participants from  
50  
51  
52 103 representative data sources, supplemented with estimates based on information from other  
53  
54 104 years and related countries from a Bayesian hierarchical model (13). The same model was  
55  
56 105 applied to all countries and used as an input the measured weight and height data, including  
57  
58  
59 106 covariates that help predict BMI (13).  
60



1  
2  
3 107 The age- (<50, 50-59, 60-69 and  $\geq 70$  years) and sex-specific relative risks (RRs) of  
4  
5  
6 108 dying from obesity (see Supplementary Material Table S1) came from a review of studies  
7  
8 109 mainly conducted in Western Europe and the USA, with the normal-weight category used as  
9  
10 110 the reference group ( $18.5 \leq \text{BMI} \leq 25 \text{ kg/m}^2$ ) (14). These age- and sex-specific RRs were largely  
11  
12  
13 111 in line with the overall European RR of 1.64 recently estimated by the Global BMI Mortality  
14  
15 112 Collaboration (7). The differences across age groups found in that study were similar with  
16  
17  
18 113 those reported in our findings (i.e., higher RRs at younger than at older ages), though they  
19  
20 114 were less distinct (7). In addition, the use of RRs with the normal weight category as the  
21  
22  
23 115 reference category is in line with previous studies that estimated obesity-attributable  
24  
25 116 mortality (15-19), while the estimation of obesity-attributable mortality with such a RR can  
26  
27  
28 117 be considered the theoretically maximally possible attributable mortality (20).

29  
30 118 All-cause mortality numbers and exposure population data by single year of age, sex,  
31  
32  
33 119 year, and country were obtained from the Human Mortality Database (21). These data are of  
34  
35  
36 120 high quality and are widely used within the demographic community and beyond (22).

### 37 38 39 121 **Patient and Public Involvement**

40  
41  
42 122 No patients were involved in this study.

### 43 44 45 123 **Methods**

46  
47  
48 124 We performed our analyses separately by country and sex, based on data by single year of  
49  
50  
51 125 age (18-100). The obesity prevalence data were turned into single-age prevalence (18-100)  
52  
53  
54 126 by applying Loess smoothing (23). The RRs were turned into single-year RRs (18- 100) using  
55  
56 127 linear regression.

1  
2  
3 128 To estimate the obesity-attributable mortality fraction (OAMF) – i.e., the share of all-  
4  
5  
6 129 cause mortality due to obesity – we used the Rockhill formula to estimate OAMFs by age (a)  
7  
8 130 and sex (s) (24).

$$11 \quad 131 \quad OAMF_{a,s} = \frac{P_{a,s} \cdot (RR_{a,s} - 1)}{1 + (P_{a,s} \cdot (RR_{a,s} - 1))} \text{(Equation 1)}$$

12  
13  
14  
15  
16 132 where  $P$  is the obesity prevalence. We then weighted the  $OAMF_{a,s}$  with the corresponding  
17  
18 133 number of deaths.

19  
20  
21 134 For the estimation of the impact of obesity on life expectancy (see 2.3.2) we needed  
22  
23  
24 135 age- and sex-specific (non-) obesity-attributable mortality rates. These were obtained by  
25  
26 136 multiplying  $OAMF_{a,s}$  and  $[1 - OAMF_{a,s}]$ , respectively, with age- and sex-specific all-cause  
27  
28 137 mortality rates.

29  
30  
31 138 To ensure comparability across countries, over time, and between men and women,  
32  
33  
34 139 we applied direct age- and sex-standardisation (25) to obesity prevalence, obesity-  
35  
36 140 attributable mortality fractions, and obesity-attributable mortality rates, using the European  
37  
38 141 population of 2011 (26) as the standard.

39  
40  
41  
42 142 To assess the impact of adult obesity on  $e_0$ , we calculated for each country the  
43  
44  
45 143 potential gain in life expectancy (PGLE) if obesity-attributable mortality were eliminated, by  
46  
47 144 calendar year and sex and is in line with the approach by Preston et al. First, we calculated  $e_0$   
48  
49 145 by applying standard life table techniques to age-specific all-cause mortality rates (0-  
50  
51 146 100)(25)). Second, we applied associated single-decrement life tables (ASDLT)(25)) to age-  
52  
53  
54 147 and sex-specific non-obesity-attributable mortality rates (0-100) to obtain  $e_0$  if obesity-  
55  
56 148 attributable mortality were eliminated. The PGLE represents the difference between the  $e_0$   
57  
58 149 based on the ASDLT and the original  $e_0$ .

1  
2  
3 150 To summarise the changes in PGLE across countries, we estimated the average  
4  
5  
6 151 annual changes in PGLE (in %):  
7  
8

$$12 \quad \text{Average annual changes in PGLE (\%)} = \frac{\sum_{t=1976}^{2012} \frac{(PGLE_t - PGLE_{t-1})}{PGLE_{t-1}}}{2012 - 1975} 100$$

15  
16 153 To assess the impact of obesity on time trends in  $e_0$  between 1975 and 2012, we  
17  
18 154 subtracted the observed change in  $e_0$  from the change in  $e_0$  without obesity. The change in  
19  
20  
21 155  $e_0$  without obesity was obtained by using the  $e_0$  values from the associated single-decrement  
22  
23 156 life tables applied to non-obesity-attributable mortality for 1975 and 2012.  
24  
25

## 26 157 Results

27  
28  
29 158 For the 26 European countries, the age-standardised obesity-attributable mortality fraction  
30  
31  
32 159 (OAMF) was, on average, 11% among men and 10% among women in 2012. For the USA,  
33  
34 160 these estimates were substantially higher; i.e., 15% and 14%, respectively. The average  
35  
36  
37 161 OAMF levels were higher in Northern, Western, and Southern Europe combined (hereafter,  
38  
39 162 Western Europe) than in CEE among men, while the opposite was the case among women.  
40  
41

42 163 OAMFs were increasing over time for all countries and both sexes, although not to  
43  
44 164 the same extent (see Figure 1, Figure S1). In Western Europe, OAMFs generally increased  
45  
46  
47 165 over the 1975-2012 period, and at a faster pace among men. In CEE, by contrast, OAMFs  
48  
49  
50 166 clearly stagnated, and even declined between 1990 and 2000. The overall increase in OAMFs  
51  
52 167 was greatest in the USA, Ireland, Norway (men), and the UK (women).  
53  
54

55 168  
56  
57  
58  
59  
60

1  
2  
3 169 **Figure 1: Age-standardised obesity-attributable mortality fractions in 26 European**  
4  
5  
6 170 **countries\* (by 5 regions) and USA, 1975-2014, 18-100 years**  
7  
8

9 171 \* Countries within the same region are presented with the same colour

10 172 **Central Europe:** Czech Republic, Hungary, Poland, Slovakia

11  
12 173 **Eastern Europe:** Belarus, Estonia, Ukraine, Latvia, Lithuania, Russian Federation

13  
14 174 **Northern Europe:** Denmark, Finland, Iceland, Norway, Sweden

15  
16 175 **Southern Europe:** Italy, Portugal, Spain

17  
18 176 **Western Europe:** Austria, Belgium, France, Ireland, Luxembourg, Netherlands, Switzerland,  
19  
20 177 United Kingdom

21  
22 178 **USA:** United States of America

23  
24 179

25  
26  
27 180 <approximately here>

28  
29  
30 181 In the 26 European countries in 2012, estimates of potential gains in life expectancy at  
31  
32 182 birth (PGLE) if obesity was eliminated ranged from 0.86 to 1.67 years among men (1.22 on  
33  
34 183 average) and from 0.66 to 1.54 years (0.98 on average) among women (Figure 2; Figure S2  
35  
36 184 and Table S2 Supplementary Material). Among men in the USA, the PGLE estimate was, at  
37  
38 185 1.73 years, slightly higher than the highest estimate in Europe; and among women in the  
39  
40 186 USA, the PGLE estimate was, at 1.44 years, the second-highest after the estimate for Russia.  
41  
42  
43  
44 187 The average PGLE estimate was 1.08 among men and 0.86 among women in Western  
45  
46 188 Europe, and was 1.44 among men and 1.16 among women in CEE (see Supplementary  
47  
48 189 Material, Table S2).

49  
50  
51  
52  
53 190  
54  
55  
56  
57  
58  
59  
60

1  
2  
3 191 **Figure 2: Potential gains in life expectancy at birth (PGLE) if obesity-attributable mortality**  
4  
5 192 **was eliminated, in 26 European countries\* (differentiating Western and Central Eastern**  
6  
7  
8 193 **Europe) and the USA, 1975-2012**  
9

10  
11 194 \* Countries within the same region are presented with the same colour

12  
13 195 **Central Eastern Europe:** Belarus, Czech Republic, Estonia, Hungary, Latvia, Lithuania, Poland,  
14  
15 196 Russian Federation, Slovakia, Ukraine

16  
17 197 **Western Europe:** Austria, Belgium, Denmark, Finland, France, Iceland, Ireland, Italy,  
18  
19 198 Luxembourg, Netherlands, Norway, Portugal, Spain, Sweden, Switzerland, United Kingdom

20  
21 199 **USA:** United States of America  
22

23 200

24  
25  
26 201 <approximately here>  
27

28  
29 202 Overall, from 1975 to 2012, PGLE due to obesity increased in all of the countries (Figure  
30  
31 203 2, Figure S2, Figure 3, 4). The increase was greater among men (average annual increase of  
32  
33 204 2.68%) than among women (average annual increase of 1.33%), was largest among men in  
34  
35 205 Portugal and Belarus and among women in Portugal, and was substantial among men and  
36  
37 206 women in Norway (Figures 3, 4). While there was a general increase in PGLE due to obesity,  
38  
39 207 this trend stagnated among women in CEE from around 1990 onwards, and levelled off after  
40  
41 208 1995 among women in Denmark and Switzerland.  
42  
43  
44  
45

46  
47 209 **Figure 3: Average annual increase (%) in potential gains in life expectancy due to obesity in**  
48  
49 210 **26 European countries and the USA between 1975-2012, in men**  
50

51 211 <approximately here>  
52

53  
54 212

55  
56 213 **Figure 4: Average annual increase (%) in potential gains in life expectancy due to obesity in**  
57  
58 214 **26 European countries and the USA between 1975-2012, in women**  
59

60 215 <approximately here>

216 Table 1 shows the impact of obesity on time trends in life expectancy at birth ( $e_0$ ).

217 Overall, the average increase in  $e_0$  between 1975 and 2012 was 7.26 years for men and 6.28

218 years for women in the 26 European countries. Without obesity, the average increase in  $e_0$

219 would have been 8.04 years for men and 6.58 years for women; or 0.78 and 0.30 years

220 higher, respectively. Among men, obesity had the greatest impact on  $e_0$  trends in Lithuania

221 and the USA (more than one year), and the smallest impact in Iceland and Sweden (0.5

222 years). Among women, obesity had the greatest impact on  $e_0$  trends in the USA and Ireland

223 (0.7 years) and the smallest impact in Estonia and the Czech Republic (less than 0.1 year).

224 **Table 1: Impact of obesity on trends in life expectancy at birth ( $e_0$ ) in 26 European**

225 **countries and USA 1975-2012, by sex**

| Country        | Change in $e_0$ with obesity 2012-1975 (years) |       | Change in $e_0$ without obesity 2012-1975 (years) |       | Effect of obesity on $e_0$ change 2012-1975 (years) |       |
|----------------|------------------------------------------------|-------|---------------------------------------------------|-------|-----------------------------------------------------|-------|
|                | Men                                            | Women | Men                                               | Women | Men                                                 | Women |
|                | Austria                                        | 10.62 | 8.61                                              | 11.25 | 8.95                                                | 0.63  |
| Belarus        | -0.55                                          | 1.43  | 0.46                                              | 1.83  | 1.00                                                | 0.40  |
| Belgium        | 8.85                                           | 7.63  | 9.46                                              | 7.99  | 0.61                                                | 0.36  |
| Czech Republic | 7.97                                           | 6.98  | 8.66                                              | 7.03  | 0.69                                                | 0.05  |
| Denmark        | 6.78                                           | 5.03  | 7.40                                              | 5.36  | 0.63                                                | 0.33  |
| Estonia        | 6.43                                           | 6.42  | 7.26                                              | 6.46  | 0.82                                                | 0.04  |
| France         | 9.49                                           | 7.99  | 10.17                                             | 8.30  | 0.68                                                | 0.31  |
| Finland        | 10.07                                          | 7.26  | 10.82                                             | 7.75  | 0.74                                                | 0.50  |
| Hungary        | 5.29                                           | 6.18  | 6.17                                              | 6.36  | 0.87                                                | 0.18  |
| Iceland        | 9.02                                           | 5.19  | 9.51                                              | 5.51  | 0.48                                                | 0.32  |
| Ireland        | 9.40                                           | 8.40  | 10.22                                             | 9.10  | 0.83                                                | 0.69  |
| Italy          | 10.19                                          | 8.56  | 10.81                                             | 8.89  | 0.62                                                | 0.33  |
| Latvia         | 4.91                                           | 4.53  | 5.82                                              | 4.70  | 0.90                                                | 0.18  |
| Lithuania      | 2.01                                           | 3.80  | 3.14                                              | 4.06  | 1.13                                                | 0.26  |
| Luxembourg     | 11.78                                          | 9.27  | 12.50                                             | 9.65  | 0.72                                                | 0.37  |
| Netherlands    | 7.68                                           | 5.10  | 8.26                                              | 5.6   | 0.56                                                | 0.49  |
| Norway         | 7.70                                           | 5.33  | 8.42                                              | 5.86  | 0.74                                                | 0.51  |
| Poland         | 5.90                                           | 6.74  | 6.81                                              | 7.00  | 0.91                                                | 0.27  |
| Portugal       | 12.14                                          | 10.87 | 12.91                                             | 11.26 | 0.77                                                | 0.40  |

|    |                                  |      |      |       |      |      |      |
|----|----------------------------------|------|------|-------|------|------|------|
| 3  | Russian Federation               | 2.05 | 2.62 | 3.06  | 2.89 | 1.02 | 0.28 |
| 4  | Slovakia                         | 5.65 | 5.82 | 6.52  | 6.16 | 0.88 | 0.34 |
| 5  | Spain                            | 8.82 | 8.75 | 9.62  | 9.14 | 0.79 | 0.39 |
| 6  | Sweden                           | 7.69 | 5.59 | 8.18  | 5.93 | 0.49 | 0.33 |
| 7  | Switzerland                      | 8.98 | 6.63 | 9.55  | 6.93 | 0.58 | 0.30 |
| 8  | Ukraine                          | 0.48 | 1.73 | 1.26  | 1.94 | 0.78 | 0.21 |
| 9  | United Kingdom                   | 9.46 | 6.96 | 10.20 | 7.55 | 0.74 | 0.59 |
| 10 | USA                              | 7.86 | 4.89 | 8.90  | 5.61 | 1.04 | 0.71 |
| 11 | <b>Average CEE countries</b>     | 4.01 | 4.63 | 4.92  | 4.84 | 0.90 | 0.22 |
| 12 | <b>Average Western countries</b> | 9.10 | 7.09 | 9.76  | 7.50 | 0.66 | 0.41 |

226

227

## 228 Discussion

### 229 Summary of results

230 In the 26 European countries studied, the share of mortality due to obesity in 2012 was, on  
 231 average, 11% among men and 10% among women. PGLE due to obesity in 2012 ranged from  
 232 0.86 to 1.73 years among men, and from 0.66 to 1.54 years among women. Overall, PGLE  
 233 increased between 1975 and 2012, albeit more quickly among men (average annual  
 234 increase: 2.68%) than among women (1.33%). Among women in Denmark, Switzerland, and  
 235 the CEE countries the increase in PGLE levelled off after 1995. Without obesity, the average  
 236 increase in e0 between 1975 and 2012 would have been 0.78 years higher among men and  
 237 0.30 years higher among women.

### 238 Evaluation of data and methods

239 Using the recent advances in obesity data, it is now possible to study the impact of obesity  
 240 on life expectancy for a large number of countries and a long period of time. Two  
 241 methodological issues warrant our attention, however.

1  
2  
3 242 First, in calculating the share of mortality due to obesity (OAMF), which also forms  
4  
5 243 the basis for our PGLC calculations, we were hindered by limitations in the available  
6  
7  
8 244 prevalence and RRs data, which also affected the method used. As has previously been  
9  
10 245 documented, OAMF estimates are sensitive to the data and the methods used (27).

11  
12  
13 246 In selecting obesity prevalence data, we used the longest validated time series based  
14  
15 247 on population-based measurement studies that are suitable for studying the impact of  
16  
17  
18 248 obesity on long-term life expectancy trends across Europe (13). For those countries with less  
19  
20 249 available obesity data – especially the CEE countries a portion of the data we used were  
21  
22 250 merely the result of modelling. Thus, the resulting estimates should be treated with some  
23  
24  
25 251 caution . By contrast, for the non-CEE countries, most of the data we used pertain to  
26  
27 252 measured data (13). Supplementary Material, Table S3 gives the confidence intervals around  
28  
29  
30 253 the age-standardised prevalence estimates for each country by sex in order, as to provide  
31  
32 254 more information on the relative reliability of the data for the different countries in our  
33  
34  
35 255 analysis.

36  
37 256 Because age- and sex-specific RRs of mortality associated with obesity are not readily  
38  
39 257 available by country and year, we have decided to apply to all of the countries studied age-  
40  
41  
42 258 and sex-specific RRs from Western European and US populations that are largely suitable for  
43  
44  
45 259 our setting, as had previously been done (10). Although RRs could differ slightly across  
46  
47 260 contexts, studies that compared RRs across continents found only small differences in RRs  
48  
49  
50 261 between Europe and North America (7). Consequently, we do not expect to observe large  
51  
52 262 differences between individual countries. In addition, as time-variant European RRs were  
53  
54 263 not available, we had to apply time-constant RRs, even though it is possible that changes in  
55  
56  
57 264 the association of obesity with mortality – which could, for example, occur because of  
58  
59 265 improvements in the treatment of chronic diseases – have affected the impact of obesity on  
60



1  
2  
3 266 life expectancy. Previous studies that assessed changes over time in the association of  
4  
5 267 obesity with mortality did so only for the US, and, unfortunately, provided mixed evidence,  
6  
7  
8 268 with some of these studies reporting a decline (18, 28, 29), and others finding an increase  
9  
10 269 (30). Therefore, before implementing time-variant European RRs, more information on their  
11  
12 270 direction is required. Similarly, comparable country-specific RRs are urgently needed. In  
13  
14 271 addition, the choice of these RRs along with their reference group might exert an effect in  
15  
16 272 our estimates. Based on the available data, only a fairly simple – albeit common applied –  
17  
18 273 the weighted sum method could be applied (27) to estimate the OAMFs. The application of a  
19  
20 274 more advanced methodology (27) could have affected the OAMFs and thus the PGLE levels,  
21  
22 275 but less the trends(31). The lack of information on the uncertainty of the RRs we used  
23  
24 276 limited us in estimating confidence intervals for the OAMFs and PGLEs.

25  
26  
27  
28  
29 277 Second, besides being the result of the OAMFs, the PGLE estimates can also be  
30  
31 278 affected by all-cause mortality levels and trends as age- and sex-specific all-cause mortality  
32  
33 279 rates are used to estimate PGLE. Since all-cause mortality fluctuated greatly in CEE in the  
34  
35 280 analysed period (12), short-term variations in PGLE in CEE countries should be treated with  
36  
37 281 more caution.

### 282 **Explanation of results**

283 In 2012, the PGLE due to obesity were, on average, 1.22 years for men and 0.98  
284 years for women in the 26 European countries, and 1.73 years for men and 1.43 years for  
285 women in the USA. A comparison of our 2006 e50 estimates with those of Preston et al. (10)  
286 for the same countries uncovered only small differences, except among men in the USA (our  
287 estimate was 0.56 years lower) and women in the UK (our estimate was 0.29 years lower)  
288 (see Supplementary Material, Table S4). Given that approximately the same methodology  
289 was used to estimate the OAMFs, the observed differences are most likely due to the use of

1  
2  
3 290 different obesity prevalence and RRs data. Preston used prevalence data from national  
4  
5 291 representative surveys and RRs from the Prospective Studies collaboration (10). Given that  
6  
7  
8 292 the observed differences do not have the same direction for the different countries, we  
9  
10 293 believe that these differences are mainly attributable to the prevalence data used. To  
11  
12 294 further evaluate our observed PGLE levels, we compared them with own PGLE estimates for  
13  
14 295 smoking and alcohol (32). Our PGLE estimates for smoking were 2.38 years for men and 1.00  
15  
16 296 year for women in Western Europe, and 3.82 years for men and 0.67 years for women in  
17  
18 297 CEE. Our PGLE estimates for alcohol were 0.90 years for men and 0.44 years for women in  
19  
20 298 Western Europe, and 2.15 years for men and 1.00 year for women in CEE (32) while our  
21  
22 299 average PGLE for obesity was 1.08 among men and 0.86 among women in Western Europe,  
23  
24 300 and 1.44 among men and 1.16 among women in CEE. Thus, obesity's impact on life  
25  
26 301 expectancy lies between that of smoking and alcohol, and can be considered significant.  
27  
28  
29  
30  
31  
32

33 302 In our study, we found that PGLE due to obesity was increasing, but that this trend  
34  
35 303 differed across countries and between the sexes. This overall trend can be explained by the  
36  
37 304 general increase in obesity prevalence in European countries (see Supplementary Material,  
38  
39 305 Figure S3) (13) and the resulting growth in the burden of obesity (3), which is also reflected  
40  
41 306 in the OAMFs (Figure 1, Figure S1) in these countries.  
42  
43  
44  
45

46 307 At the same time, parts of the observed variation in the increase in PGLE estimates  
47  
48 308 across the USA, Western Europe, and CEE and between the sexes reflect differences in the  
49  
50 309 onset, the development, and the impact of the obesity epidemic in these countries and in  
51  
52 310 men and women. Across the countries studied, the absolute increase in PGLE was largest  
53  
54 311 among women and second-largest among men in the USA. This pattern is in line with  
55  
56 312 evidence showing that between 1980 and 2008, obesity increased much more in the USA  
57  
58  
59  
60

1  
2  
3 313 than in Europe(1, 33). This rapid progression of the obesity epidemic in the USA and its large  
4  
5 314 impact on life expectancy has been attributed to an increasingly obesogenic environment  
6  
7  
8 315 caused by factors such as changes in food preparation and processes that promote the  
9  
10 316 consumption of calorically dense foods, and a pronounced decrease in physical activity levels  
11  
12  
13 317 (34). The obesity epidemic has progressed more slowly in Western Europe than in the USA(1,  
14  
15 318 13). However, obesity levels in countries like the UK and Ireland are rapidly approaching  
16  
17  
18 319 those in the USA (35), as our PGLLE estimates also show.

21 320 In the CEE countries, the PGLLE trends track the evolution of the obesity epidemic in  
22  
23 321 that region (see Supplementary Material, Figure S3). Obesity levels have been higher in CEE  
24  
25 322 than in Western Europe since 1980 (36, 37), which suggests that the epidemic started earlier  
26  
27  
28 323 in CEE. As a result of this earlier onset, the impact of obesity (as expressed in terms of OAMF  
29  
30 324 and PGLLE) in the 1970s and 1980s was at times even greater in CEE than in the USA,  
31  
32  
33 325 especially among women. While there are many potential explanations for this early onset  
34  
35 326 of the obesity epidemic in CEE, the available data indicate that the main factors were the  
36  
37  
38 327 relatively high total energy supply and energy intake in CEE in those years (38).

41 328 The overall progress of the obesity epidemic was lower in CEE than in Western  
42  
43 329 Europe, and the increase was not constant (1). Indeed, in CEE, increases in obesity  
44  
45 330 prevalence(1, 39), OAMFs, and PGLLE stagnated in the 1980-2008 period, and were more  
46  
47  
48 331 pronounced in the 1990s (1, 39). However, as these countries started the study period with  
49  
50 332 higher obesity prevalence levels, these trends resulted in the CEE having higher average  
51  
52  
53 333 PGLLE levels than the West. The pattern of stagnation observed in the CEE, could be  
54  
55  
56 334 explained by the decrease in energy supplies at the beginning of the 1990s in CEE (37)  
57  
58 335 resulting from the dramatic economic and political changes in those countries (3, 36, 39) and  
59  
60

1  
2  
3 336 which in turn affected the socio-economic status of the population (SES). Among CEE  
4  
5  
6 337 women, the increase in obesity starting in the 1990s was smaller than it was in the previous  
7  
8 338 period, and was smaller than it was among CEE men. The lower risk of obesity observed  
9  
10 339 among women than among men with low socioeconomic status (SES) in low-income  
11  
12  
13 340 countries (40) may explain this difference.

14  
15  
16 341 In Western Europe, a stagnation in PGLLE levels was observed among women in  
17  
18 342 Denmark and Switzerland after 1995. This finding seems to be in line with studies reporting a  
19  
20 343 levelling-off of mean BMI since the 1990s (41); and in specific sub-populations, such as  
21  
22 344 adults with high SES in regions within Switzerland, Italy, France, and Finland  
23  
24  
25 345 (37). Although dietary and physical activity information is spreading equally across  
26  
27 346 socioeconomic groups, those with higher SES have a greater ability and capacity to adopt a  
28  
29 347 healthier dietary and physical activity pattern (42). In addition, it appears that higher SES  
30  
31 348 women in particular are more health-conscious, have healthier food habits, and are more  
32  
33 349 prone to follow nutritional recommendations (43) as they are under greater social pressure  
34  
35 350 to be thin (44). Similarly, countries with higher income levels and lower levels of inequality  
36  
37 351 (45), like Switzerland and Denmark, tend to have lower obesity levels, especially among  
38  
39  
40  
41  
42  
43 352 women.

44  
45  
46 353 When we considered the impact of obesity on life expectancy in the 26 European  
47  
48 354 countries, we found that without obesity, the increase in e0 between 1975 and 2012 would  
49  
50 355 have been, on average, 0.78 years higher among men and 0.30 years higher among women.  
51  
52 356 These figures account for approximately 10% of the average change in e0 between 1975 and  
53  
54 357 2012 among men, and 5% among women. It is therefore clear that the impact of obesity on  
55  
56 358 changes in e0 should not be ignored. Moreover, the impact of obesity on life expectancy  
57  
58  
59  
60

1  
2  
3 359 levels and on life expectancy trends is likely to increase, as previous studies have also  
4  
5 360 suggested (8). There are several indicators pointing in that direction, including evidence that  
6  
7  
8 361 obesity's impact is already substantially greater in the USA (13% among men and 15%  
9  
10 362 among women) than elsewhere; obesity prevalence is increasing rapidly in most European  
11  
12 363 countries (see Supplementary Material, Figure S3); obesity is increasing in severity; and the  
13  
14  
15 364 duration of obesity is rising in younger generations (8).

### 365 **Conclusion and implications**

366 Obesity was proven to have an impact on both life expectancy levels and trends in  
367 Europe. The observed differences in the increase in the impact of obesity across countries  
368 and between the sexes reflect differences in the onset and the progression of the obesity  
369 epidemic, and can be linked to contextual factors (economic conditions, obesogenic  
370 environment, energy supplies), as well as to differences in people's ability and capacity to  
371 adopt healthier lifestyles.

372 It is likely that in the future obesity will have a larger impact on mortality and life  
373 expectancy in Europe, as obesity prevalence and obesity-attributable mortality continue to  
374 increase in the majority of countries. These trends will have important health, economic,  
375 and social implications. Specifically, the increasing prevalence of obesity among European  
376 populations, and especially at younger ages, will lead to an increased prevalence of obesity-  
377 related disorders, as well as to increases in the mortality burden associated with obesity and  
378 in obesity's effects on life expectancy and quality of life. Thus, obesity will constitute an  
379 additional burden for societies, economies, and public health. It is therefore crucial that  
380 effective public health initiatives are undertaken to tackle the obesity epidemic and its  
381 effects on public health. Such initiatives should address the multifactorial and complex

1  
2  
3 382 obesity aetiology; the clear differences between countries and the sexes; as well as the  
4  
5 383 factors underlying these differences, such as contextual factors and differences in  
6  
7  
8 384 individuals' ability and capacity to adopt healthier lifestyles.  
9

#### 10 11 385 **Funding** 12

13  
14 386 This work was supported by the Netherlands Organisation for Scientific Research (NWO) in  
15  
16 387 connection with the research programme "Smoking, alcohol, and obesity, ingredients for  
17  
18 388 improved and robust mortality projections, grant no. 452-13-001; see  
19  
20 389 [www.futuremortality.com](http://www.futuremortality.com).  
21  
22  
23  
24

25 390

#### 26 27 28 391 **Conflict of Interest** 29

30  
31 392 None declared.  
32  
33  
34

35 393

#### 36 37 38 394 **Author contribution** 39

40  
41  
42 395 N.Vidra contributed to the conception and design of the work; to the acquisition, analysis,  
43  
44 396 and interpretation of data for the work; drafted and revised the work critically for important  
45  
46 397 intellectual content; approved the final version of the work to be published and agrees to be  
47  
48 398 accountable for all aspects of the work in ensuring that questions related to the accuracy or  
49  
50 399 integrity of any part of the work are appropriately investigated and resolved.  
51  
52  
53  
54

55 400 S. Trias-Llimós contributed to the analysis, and interpretation of data for the work; revised it  
56  
57 401 critically for important intellectual content; approved the final version of the work to be  
58  
59  
60

1  
2  
3 402 published and agrees to be accountable for all aspects of the work in ensuring that questions  
4  
5 403 related to the accuracy or integrity of any part of the work are appropriately investigated  
6  
7  
8 404 and resolved.  
9

10  
11 405 F. Janssen contributed to the conception and design of the work; to the interpretation of  
12  
13 406 data for the work; revised the work critically for important intellectual content; approved  
14  
15 407 the final version of the work to be published and agrees to be accountable for all aspects of  
16  
17 408 the work in ensuring that questions related to the accuracy or integrity of any part of the  
18  
19 409 work are appropriately investigated and resolved.  
20  
21  
22

#### 23 24 25 410 **Data statement**

26  
27  
28 411 Obesity prevalence data can be obtained from NCD Risk Factor Collaboration (NCD-RisC)  
29  
30 412 ([www.ncdrisc.org](http://www.ncdrisc.org)).  
31  
32

33  
34 413 All-cause mortality and exposure population data can be obtained from the Human  
35  
36 414 Mortality Database (<http://www.mortality.org>).  
37  
38  
39

#### 40 41 415 **Acknowledgements**

42  
43  
44 416 The authors are grateful to Professor Majid Ezatti and Dr James Bentham (Faculty of  
45  
46 417 Medicine, School of Public Health at Imperial College London); Dr Gretchen A. Stevens  
47  
48 418 (World Health Organization); and the NCD Risk Factor Collaboration (NCD-RisC)  
49  
50 419 ([www.ncdrisc.org](http://www.ncdrisc.org)) for sharing the obesity data.  
51  
52

53  
54 420 This work is financed by the Netherlands Organisation for Scientific Research (NWO) as part  
55  
56 421 of the research programme "Smoking, alcohol, and obesity, ingredients for improved and  
57  
58 422 robust mortality projections, grant no. 452-13-001. See [www.futuremortality.com](http://www.futuremortality.com)  
59  
60

1  
2  
3 423  
4  
5  
6 424  
7  
8  
910 425 **References**

- 11  
12  
13 426 1. Finucane MM, Stevens GA, Cowan MJ, Danaei G, Lin JK, Paciorek CJ, et al. National,  
14 427 regional, and global trends in body-mass index since 1980: systematic analysis of health  
15 428 examination surveys and epidemiological studies with 960 country-years and 9.1 million  
16 429 participants. *Lancet*. 2011 Feb 12;377(9765):557-67.
- 20  
21  
22 430 2. Overweight and obesity - BMI statistics [Internet].; 2017 []. Available from:  
23 431 [http://ec.europa.eu/eurostat/statistics-explained/index.php/Overweight\\_and\\_obesity -](http://ec.europa.eu/eurostat/statistics-explained/index.php/Overweight_and_obesity_-_BMI_statistics)  
24 432 [\\_BMI\\_statistics](http://ec.europa.eu/eurostat/statistics-explained/index.php/Overweight_and_obesity_-_BMI_statistics).
- 27  
28 433 3. WHO. The challenge of Obesity in the WHO European Region and the Strategies for  
29 434 Response: Summary. Copenhagen: World Health Organization, Regional Office for Europe;  
30 435 2007.
- 33  
34 436 4. Seidell JC. Prevalence and time trends of obesity in Europe. *Journal of endocrinological*  
35 437 *investigation*. 2002;25(10):816-22.
- 38  
39 438 5. Eurostat. European Health Interview Survey - Almost 1 adult in 6 in the EU is considered  
40 439 obese - Share of obesity increases with age and decreases with education level. 2016.
- 43  
44 440 6. Field AE, Coakley EH, Must A, Spadano JL, Laird N, Dietz WH, et al. Impact of overweight  
45 441 on the risk of developing common chronic diseases during a 10-year period. *Archives of*  
46 442 *Internal Medicine*. 2001 Jul 9;161(13):1581-6.
- 50  
51 443 7. Global BMI Mortality Collaboration, Di Angelantonio E, Bhupathiraju S, Wormser D, Gao P,  
52 444 Kaptoge S, et al. Body-mass index and all-cause mortality: individual-participant-data meta-  
53 445 analysis of 239 prospective studies in four continents. *Lancet*. 2016 Aug 20;388(10046):776-  
54 446 86.
- 57  
58  
59  
60



- 1  
2  
3 447 8. Alley DE, Lloyd J, Shardell M. Can obesity account for cross-national differences in life  
4 448 expectancy trends? In: Crimmins EM, Preston SH, Cohen B, editors. International differences  
5 449 in mortality at older ages: Dimensions and sources, panel on understanding divergent trends  
6 450 in longevity in high-income countries. Washington, DC: National Academies Press; 2011. p.  
7 451 164-92.
- 8  
9  
10  
11  
12  
13 452 9. Olshansky SJ, Passaro DJ, Hershov RC, Layden J, Carnes BA, Brody J, et al. A potential  
14 453 decline in life expectancy in the United States in the 21st century. *The New England Journal*  
15 454 *of Medicine*. 2005 Mar 17;352(11):1138-45.
- 16  
17  
18  
19  
20 455 10. Preston SH, Stokes A. Contribution of obesity to international differences in life  
21 456 expectancy. *American Journal of Public Health*. 2011 Nov;101(11):2137-43.
- 22  
23  
24  
25 457 11. National Research Council. The Role of Obesity. In: Crimmins EM, Preston SH, Cohen B,  
26 458 editors. *Explaining Divergent Levels of Longevity in High-Income Countries*. Washington, DC:  
27 459 National Academies Press; 2011. p. 43-55.
- 28  
29  
30  
31 460 12. Leon DA. Trends in European life expectancy: a salutary view. *International Journal of*  
32 461 *Epidemiology*. 2011 Apr;40(2):271-7.
- 33  
34  
35  
36 462 13. NCD Risk Factor Collaboration. Trends in adult body-mass index in 200 countries from  
37 463 1975 to 2014: a pooled analysis of 1698 population-based measurement studies with 19.2  
38 464 million participants. *Lancet*. 2016 Apr 2;387(10026):1377-96.
- 39  
40  
41  
42  
43 465 14. Lobstein T, Leach RJ. Workpackage 7: Overweight and Obesity Report on data collection  
44 466 for overweight and obesity prevalence and related relative risks. 2010.
- 45  
46  
47  
48 467 15. Allison DB, Fontaine KR, Manson JE, Stevens J, VanItallie TB. Annual deaths attributable  
49 468 to obesity in the United States. *JAMA*. 1999 Oct 27;282(16):1530-8.
- 50  
51  
52  
53 469 16. Banegas JR, Lopez-Garcia E, Gutierrez-Fisac JL, Guallar-Castillon P, Rodriguez-Artalejo F. A  
54 470 simple estimate of mortality attributable to excess weight in the European Union. *Eur J Clin*  
55 471 *Nutr*. 2003 Feb;57(2):201-8.
- 56  
57  
58  
59  
60

- 1  
2  
3 472 17. A Robertson, T Lobstein, C Knai. Obesity and socio-economic groups in Europe: Evidence  
4  
5 473 review and implications for action. 2007.  
6  
7  
8 474 18. Flegal KM, Graubard BI, Williamson DF, Gail MH. Excess deaths associated with  
9  
10 475 underweight, overweight, and obesity. JAMA. 2005 Apr 20;293(15):1861-7.  
11  
12  
13 476 19. Katzmarzyk PT, Ardern CI. Overweight and obesity mortality trends in Canada, 1985-  
14  
15 477 2000. Can J Public Health. 2004 Jan-Feb;95(1):16-20.  
16  
17  
18 478 20. GBD 2017 Risk Factor Collaborators. Global, regional, and national comparative risk  
19  
20 479 assessment of 84 behavioural, environmental and occupational, and metabolic risks or  
21  
22 480 clusters of risks for 195 countries and territories, 1990-2017: a systematic analysis for the  
23  
24 481 Global Burden of Disease Study 2017. Lancet. 2018 Nov 10;392(10159):1923-94.  
25  
26  
27 482 21. University of California, Berkeley (USA), and Max Planck Institute for Demographic  
28  
29 483 Research (Germany). [Internet]. []. Available from: <http://www.mortality.org>.  
30  
31 484 22. Barbieri M, Wilmoth JR, Shkolnikov VM, Gleijer D, Jasilionis D, Jdanov D, et al. Data  
32  
33 485 Resource Profile: The Human Mortality Database (HMD). Int J Epidemiol. 2015  
34  
35 486 Oct;44(5):1549-56.  
36  
37  
38 487 23. Cleveland WS, Loader C. Smoothing by local regression: Principles and methods. In:  
39  
40 488 Murray Hill: A&T Bell Laboratorie; 1995.  
41  
42  
43 489 24. Rockhill B, Newman B, Weinberg C. Use and misuse of population attributable fractions.  
44  
45 490 American Journal of Public Health. 1998 Jan;88(1):15-9.  
46  
47  
48 491 25. Preston SH, Heuveline P, Guillot M. Demography. Malden, MA: Blackwell; 2001.  
49  
50  
51 492 26. Census data [Internet].; 2011 []. Available from:  
52  
53 493 <https://ec.europa.eu/CensusHub2/query.do?step=selectHyperCube&qhc=false>.  
54  
55  
56 494 27. Flegal KM, Panagiotou OA, Graubard BI. Estimating population attributable fractions to  
57  
58 495 quantify the health burden of obesity. Annals of Epidemiology. 2015 Mar;25(3):201-7.  
59  
60

- 1  
2  
3 496 28. Mehta NK, Chang VW. Secular declines in the association between obesity and mortality  
4  
5 497 in the United States. *Population and Development Review*. 2011;37(3):435-51.  
6  
7  
8 498 29. Yu Y. Reexamining the declining effect of age on mortality differentials associated with  
9  
10 499 excess body mass: evidence of cohort distortions in the United States. *American Journal of*  
11  
12 500 *Public Health*. 2012 May;102(5):915-22.  
13  
14  
15 501 30. Yu Y. The Changing Body Mass-Mortality Association in the United States: Evidence of  
16  
17 502 Sex-Specific Cohort Trends from Three National Health and Nutrition Examination Surveys.  
18  
19 503 *Biodemography and Social Biology*. 2016;62(2):143-63.  
20  
21  
22 504 31. Vidra N, Bijlsma MJ, Janssen F. Impact of Different Estimation Methods on Obesity-  
23  
24 505 Attributable Mortality Levels and Trends: The Case of The Netherlands. *Int J Environ Res*  
25  
26 506 *Public Health*. 2018 Sep 29;15(10):10.3390/ijerph15102146.  
27  
28 507 32. Trias-Llimós S, Kunst AE, Jasilionis D, Janssen F. The contribution of alcohol to the East-  
29  
30 508 West life expectancy gap in Europe from 1990 onward. *International Journal of*  
31  
32 509 *Epidemiology*. 2017;47(3):731-9.  
33  
34  
35 510 33. Doak CM, Wijnhoven TM, Schokker DF, Visscher TL, Seidell JC. Age standardization in  
36  
37 511 mapping adult overweight and obesity trends in the WHO European Region. *Obesity*  
38  
39 512 *Reviews*. 2012 Feb;13(2):174-91.  
40  
41  
42 513 34. Cutler DM, Glaeser EL, Shapiro JM. Why Have Americans Become More Obese? *The*  
43  
44 514 *Journal of Economic Perspectives*. 2003;17(1):93-118.  
45  
46  
47 515 35. Obesity update 2012 [Internet].; 2012 []. Available from:  
48 516 <http://www.oecd.org/els/health-systems/49716427.pdf>.  
49  
50  
51 517 36. Malik VS, Willett WC, Hu FB. Global obesity: trends, risk factors and policy implications.  
52  
53 518 *Nature reviews Endocrinology*. 2013 Jan;9(1):13-27.  
54  
55  
56 519 37. Silventoinen K, Sans S, Tolonen H, Monterde D, Kuulasmaa K, Kesteloot H, et al. Trends in  
57  
58 520 obesity and energy supply in the WHO MONICA Project. *International Journal of Obesity and*  
59  
60 521 *Related Metabolic Disorders*. 2004 May;28(5):710-8.

- 1  
2  
3 522 38. Zatonski WA, Bhala N. Changing trends of diseases in Eastern Europe: closing the gap.  
4  
5 523 Public Health. 2012 Mar;126(3):248-52.  
6  
7  
8 524 39. Bray GA, Bouchard C. Handbook of Obesity: Etiology and Pathophysiology. second ed.  
9  
10 525 Boca Raton: CRC Press Taylor & Francis Group; 2003.  
11  
12  
13 526 40. Monteiro CA, Conde WL, Lu B, Popkin BM. Obesity and inequities in health in the  
14  
15 527 developing world. International Journal of Obesity. 2004 Sep;28(9):1181-6.  
16  
17  
18 528 41. Wilkins E, Wilson L, Wickramasinghe K, Bhatnagar P, Leal J, Luengo-Fernandez R, et al.  
19  
20 529 European Cardiovascular Disease Statistics 2017. Brussels: European Heart Network; 2017.  
21  
22  
23 530 42. Robertson A, Lobstein T, Knai C. Obesity and socio-economic groups in Europe: Evidence  
24  
25 531 review and implications for action. Brussels: European Commission. 2007.  
26  
27  
28 532 43. Fagerli RA, Wandel M. Gender differences in opinions and practices with regard to a  
29  
30 533 "healthy diet". Appetite. 1999 Apr;32(2):171-90.  
31  
32  
33 534 44. Psaltopoulou T, Hatzis G, Papageorgiou N, Androulakis E, Briasoulis A, Tousoulis D.  
34  
35 535 Socioeconomic status and risk factors for cardiovascular disease: Impact of dietary  
36  
37 536 mediators. Hellenic Journal of Cardiology. 2017 Jan - Feb;58(1):32-42.  
38  
39 537 45. WHO. Obesity and inequities. Guidance for addressing inequities in overweight and  
40  
41 538 obesity. Copenhagen: World Health Organization, Regional Office for Europe; 2014.  
42  
43  
44 539  
45  
46 540  
47  
48  
49 541  
50  
51  
52  
53 542  
54  
55  
56  
57  
58  
59  
60

1  
2  
3 543 **Figure legends**  
4

5 544 **Figure 1: Age-standardised obesity-attributable mortality fractions in 26 European**  
6 **countries\* (by 5 regions) and USA, 1975-2014, 18-100 years**  
7

8  
9 546

10  
11 547 \* Countries within the same region are presented with the same colour

12  
13 548 **Central Europe:** Czech Republic, Hungary, Poland, Slovakia

14  
15 549 **Eastern Europe:** Belarus, Estonia, Ukraine, Latvia, Lithuania, Russian Federation

16  
17 550 **Northern Europe:** Denmark, Finland, Iceland, Norway, Sweden

18  
19 551 **Southern Europe:** Italy, Portugal, Spain

20  
21 552 **Western Europe:** Austria, Belgium, France, Ireland, Luxembourg, Netherlands, Switzerland,  
22 United Kingdom

23  
24 554 **USA:** United States of America

25  
26 555

27  
28 556 **Figure 2: Potential gains in life expectancy at birth (PGLE) if obesity-attributable mortality**  
29 **was eliminated, in 26 European countries\* (differentiating Western and Central Eastern**  
30 **Europe) and the USA, 1975-2012, 18-100 years**  
31

32  
33 559

34  
35  
36 560 \* Countries within the same region are presented with the same colour

37  
38 561 **Central Eastern Europe:** Belarus, Czech Republic, Estonia, Hungary, Latvia, Lithuania, Poland,  
39 Russian Federation, Slovakia, Ukraine

40  
41 563 **Western Europe:** Austria, Belgium, Denmark, Finland, France, Iceland, Ireland, Italy,  
42 Luxembourg, Netherlands, Norway, Portugal, Spain, Sweden, Switzerland, United Kingdom

43  
44 564 **USA:** United States of America

45  
46 565  
47 566  
48  
49

50 567 **Figure 3: Average annual increase (%) in potential gains in life expectancy due to obesity in**  
51 **26 European countries and the USA between 1975-2012, in men**  
52

53  
54 569

55 570 **Figure 4: Average annual increase (%) in potential gains in life expectancy due to obesity in**  
56 **26 European countries and the USA between 1975-2012, in women**  
57

58  
59 572  
60

1  
2  
3 573  
4  
5  
6 574  
7  
8 575  
9  
10 576  
11  
12  
13  
14  
15  
16  
17  
18  
19  
20  
21  
22  
23  
24  
25  
26  
27  
28  
29  
30  
31  
32  
33  
34  
35  
36  
37  
38  
39  
40  
41  
42  
43  
44  
45  
46  
47  
48  
49  
50  
51  
52  
53  
54  
55  
56  
57  
58  
59  
60

For peer review only

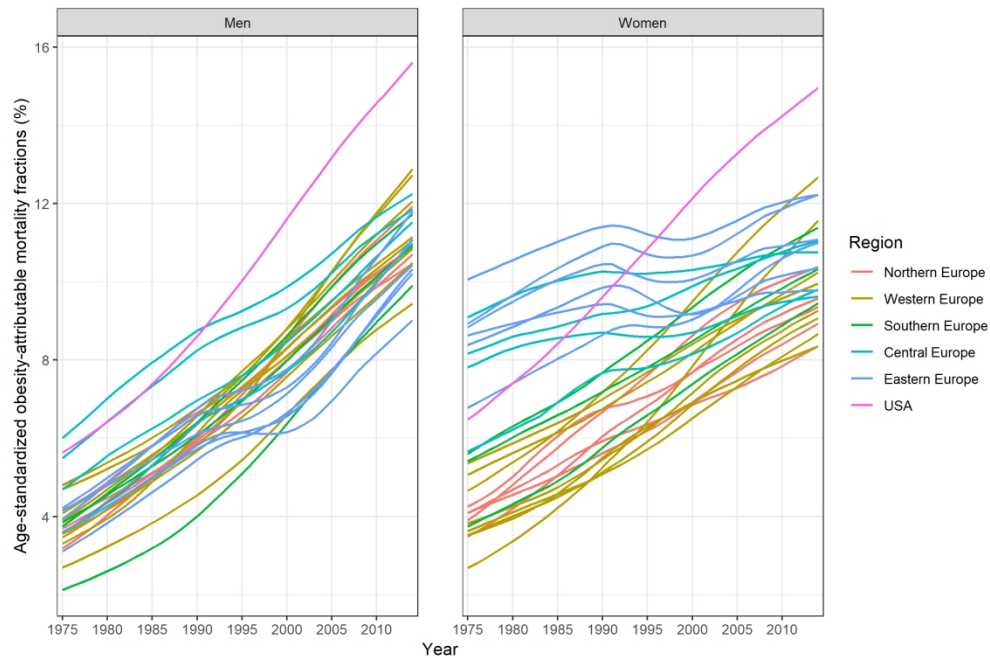

Figure 1: Age-standardised obesity-attributable mortality fractions in 26 European countries\* (by 5 regions) and USA, 1975-2014, 18-100 years

\* Countries within the same region are presented with the same colour

Central Europe: Czech Republic, Hungary, Poland, Slovakia

Eastern Europe: Belarus, Estonia, Ukraine, Latvia, Lithuania, Russian Federation

Northern Europe: Denmark, Finland, Iceland, Norway, Sweden

Southern Europe: Italy, Portugal, Spain

Western Europe: Austria, Belgium, France, Ireland, Luxembourg, Netherlands, Switzerland, United Kingdom

USA: United States of America

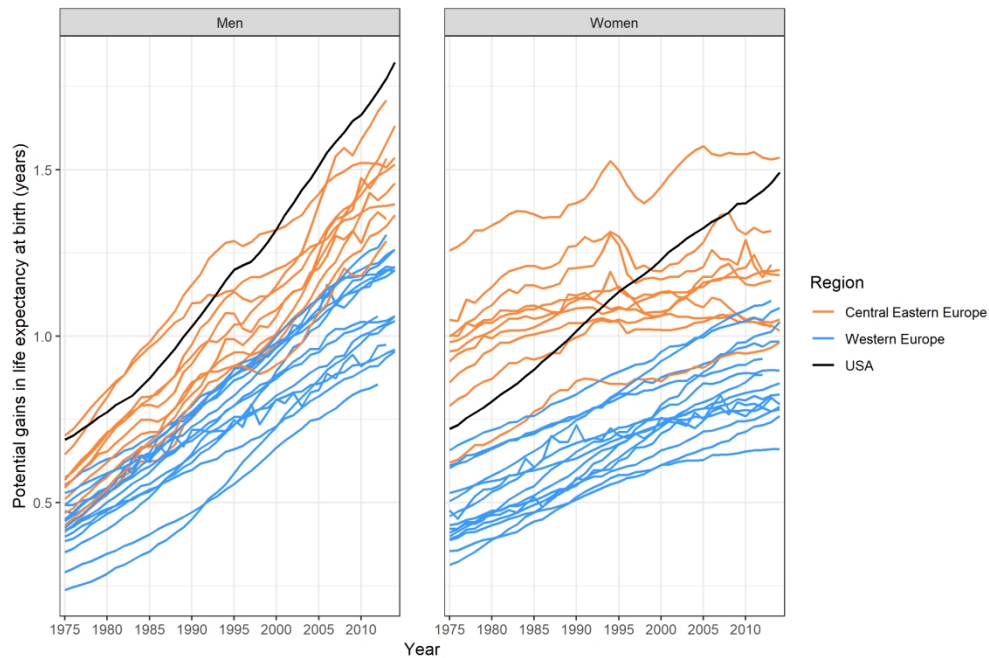

Figure 2: Potential gains in life expectancy at birth (PGLE) if obesity-attributable mortality was eliminated, in 26 European countries\* (differentiating Western and Central Eastern Europe) and the USA, 1975-2012

\* Countries within the same region are presented with the same colour

Central Eastern Europe: Belarus, Czech Republic, Estonia, Hungary, Latvia, Lithuania, Poland, Russian Federation, Slovakia, Ukraine

Western Europe: Austria, Belgium, Denmark, Finland, France, Iceland, Ireland, Italy, Luxembourg, Netherlands, Norway, Portugal, Spain, Sweden, Switzerland, United Kingdom

USA: United States of America



1  
2  
3  
4  
5  
6  
7  
8  
9  
10  
11  
12  
13  
14  
15  
16  
17  
18  
19  
20  
21  
22  
23  
24  
25  
26  
27  
28  
29  
30  
31  
32  
33  
34  
35  
36  
37  
38  
39  
40  
41  
42  
43  
44  
45  
46  
47  
48  
49  
50  
51  
52  
53  
54  
55  
56  
57  
58  
59  
60

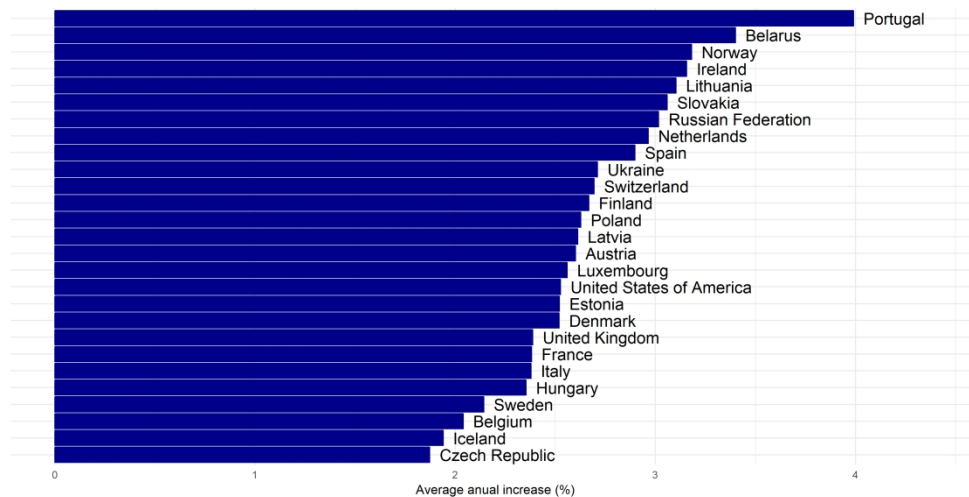

Figure 3: Average annual increase (%) in potential gains in life expectancy due to obesity in 26 European countries and the USA between 1975-2012, in men

1  
2  
3  
4  
5  
6  
7  
8  
9  
10  
11  
12  
13  
14  
15  
16  
17  
18  
19  
20  
21  
22  
23  
24  
25  
26  
27  
28  
29  
30  
31  
32  
33  
34  
35  
36  
37  
38  
39  
40  
41  
42  
43  
44  
45  
46  
47  
48  
49  
50  
51  
52  
53  
54  
55  
56  
57  
58  
59  
60

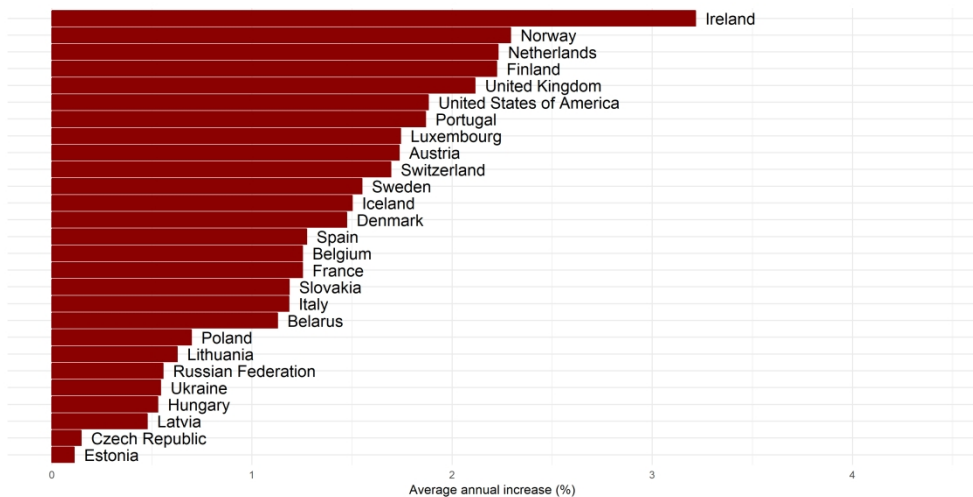

Figure 4: Average annual increase (%) in potential gains in life expectancy due to obesity in 26 European countries and the USA between 1975-2012, in women

## Impact of obesity on life expectancy among different European countries, 1975-2012

Nikoletta Vidra<sup>1</sup>, Sergi Trias-Llimós<sup>1</sup>, Fanny Janssen<sup>1,2</sup>

<sup>1</sup> Population Research Centre, Faculty of Spatial Sciences, University of Groningen, Landlevens  
1, 9747 AD Groningen, The Netherlands.

<sup>2</sup> Netherlands Interdisciplinary Demographic Institute, Lange Houtstraat 19, 2511 CV The  
Hague, The Netherlands

### Supplementary material

**Table S1: Age-and sex-specific RRs of dying from obesity from the meta-review from Lobstein et al. (2010)**

| Age   | RR*    |       |
|-------|--------|-------|
|       | Men    | Women |
| <50   | 1.55   | 1.5   |
| 50-59 | 1.539  | 1.49  |
| 60-69 | 1.5225 | 1.475 |
| 70+   | 1.495  | 1.45  |

\*Reference group for the RRs: normal weight ( $18.5 \leq \text{BMI} \leq 24.9 \text{ kg/m}^2$ )

**Table S2: Potential gains in life expectancy at birth (PGL) if obesity-attributable mortality was eliminated, in 26 European countries (differentiating Western and Central Eastern Europe) and the USA, in 1975 and 2012, 18-100 years**

| Country                             | PGL 1975 |       | PGL 2012 |       |
|-------------------------------------|----------|-------|----------|-------|
|                                     | Men      | Women | Men      | Women |
| <b>Central Eastern Europe (CEE)</b> |          |       |          |       |
| Belarus                             | 0.41     | 0.79  | 1.41     | 1.19  |
| Czech Republic                      | 0.70     | 0.98  | 1.39     | 1.03  |
| Estonia                             | 0.55     | 1.00  | 1.37     | 1.04  |
| Hungary                             | 0.64     | 0.86  | 1.52     | 1.04  |
| Latvia                              | 0.58     | 1.00  | 1.48     | 1.18  |
| Lithuania                           | 0.54     | 1.05  | 1.67     | 1.31  |
| Poland                              | 0.57     | 0.93  | 1.48     | 1.19  |
| Russian Federation                  | 0.51     | 1.26  | 1.53     | 1.54  |
| Slovakia                            | 0.43     | 0.62  | 1.31     | 0.96  |
| Ukraine                             | 0.47     | 0.95  | 1.25     | 1.16  |
| Average CEE                         | 0.54     | 0.94  | 1.44     | 1.16  |
| <b>Western Europe</b>               |          |       |          |       |
| Austria                             | 0.40     | 0.39  | 1.03     | 0.73  |
| Belgium                             | 0.55     | 0.61  | 1.17     | 0.97  |
| Denmark                             | 0.42     | 0.46  | 1.04     | 0.79  |
| France                              | 0.49     | 0.53  | 1.18     | 0.84  |
| Finland                             | 0.45     | 0.40  | 1.19     | 0.90  |
| Ireland                             | 0.38     | 0.31  | 1.21     | 1.01  |
| Iceland                             | 0.49     | 0.48  | 0.97     | 0.80  |
| Italy                               | 0.44     | 0.60  | 1.06     | 0.93  |
| Luxembourg                          | 0.47     | 0.42  | 1.19     | 0.79  |
| Netherlands                         | 0.29     | 0.39  | 0.86     | 0.88  |
| Norway                              | 0.34     | 0.39  | 1.07     | 0.91  |
| Portugal                            | 0.24     | 0.41  | 1.01     | 0.81  |
| Spain                               | 0.42     | 0.66  | 1.22     | 1.05  |
| Sweden                              | 0.42     | 0.43  | 0.91     | 0.76  |
| Switzerland                         | 0.35     | 0.35  | 0.93     | 0.66  |
| United Kingdom                      | 0.53     | 0.50  | 1.27     | 1.09  |
| <b>Average Western Europe</b>       | 0.41     | 0.48  | 1.08     | 0.86  |
| <b>USA</b>                          | 0.69     | 0.72  | 1.73     | 1.44  |
| <b>Average European countries</b>   | 0.46     | 0.64  | 1.22     | 0.98  |
| <b>Average all countries</b>        | 0.47     | 0.64  | 1.23     | 1.00  |

Figure S1: Age-standardised obesity-attributable mortality fractions in 26 European countries\*, grouped by 5 regions and USA, 1975-2014, 18-100 years

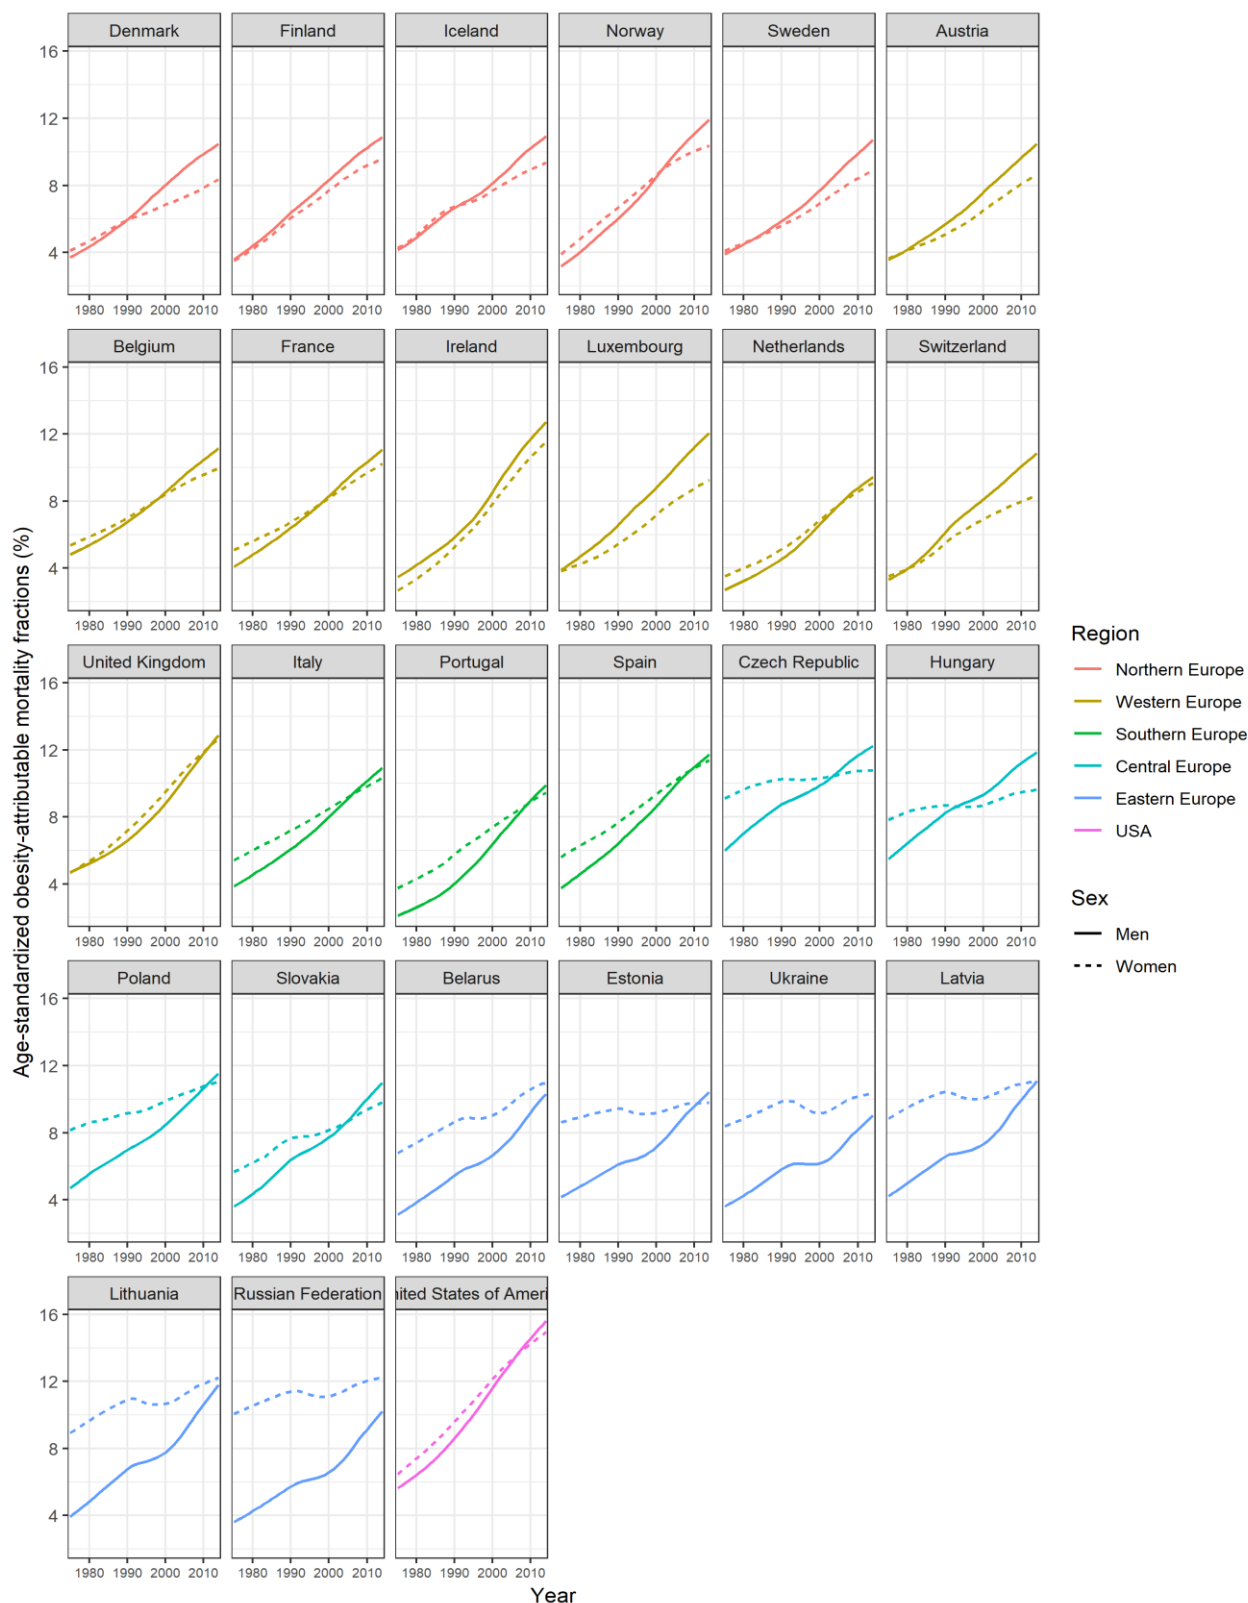

\* Countries within the same region are presented with the same colour

**Figure S2: Potential gains in life expectancy at birth (PGL) if obesity-attributable mortality was eliminated, in 26 European countries\*, grouped by 5 regions and USA, 1975-2012, 18-100 years**

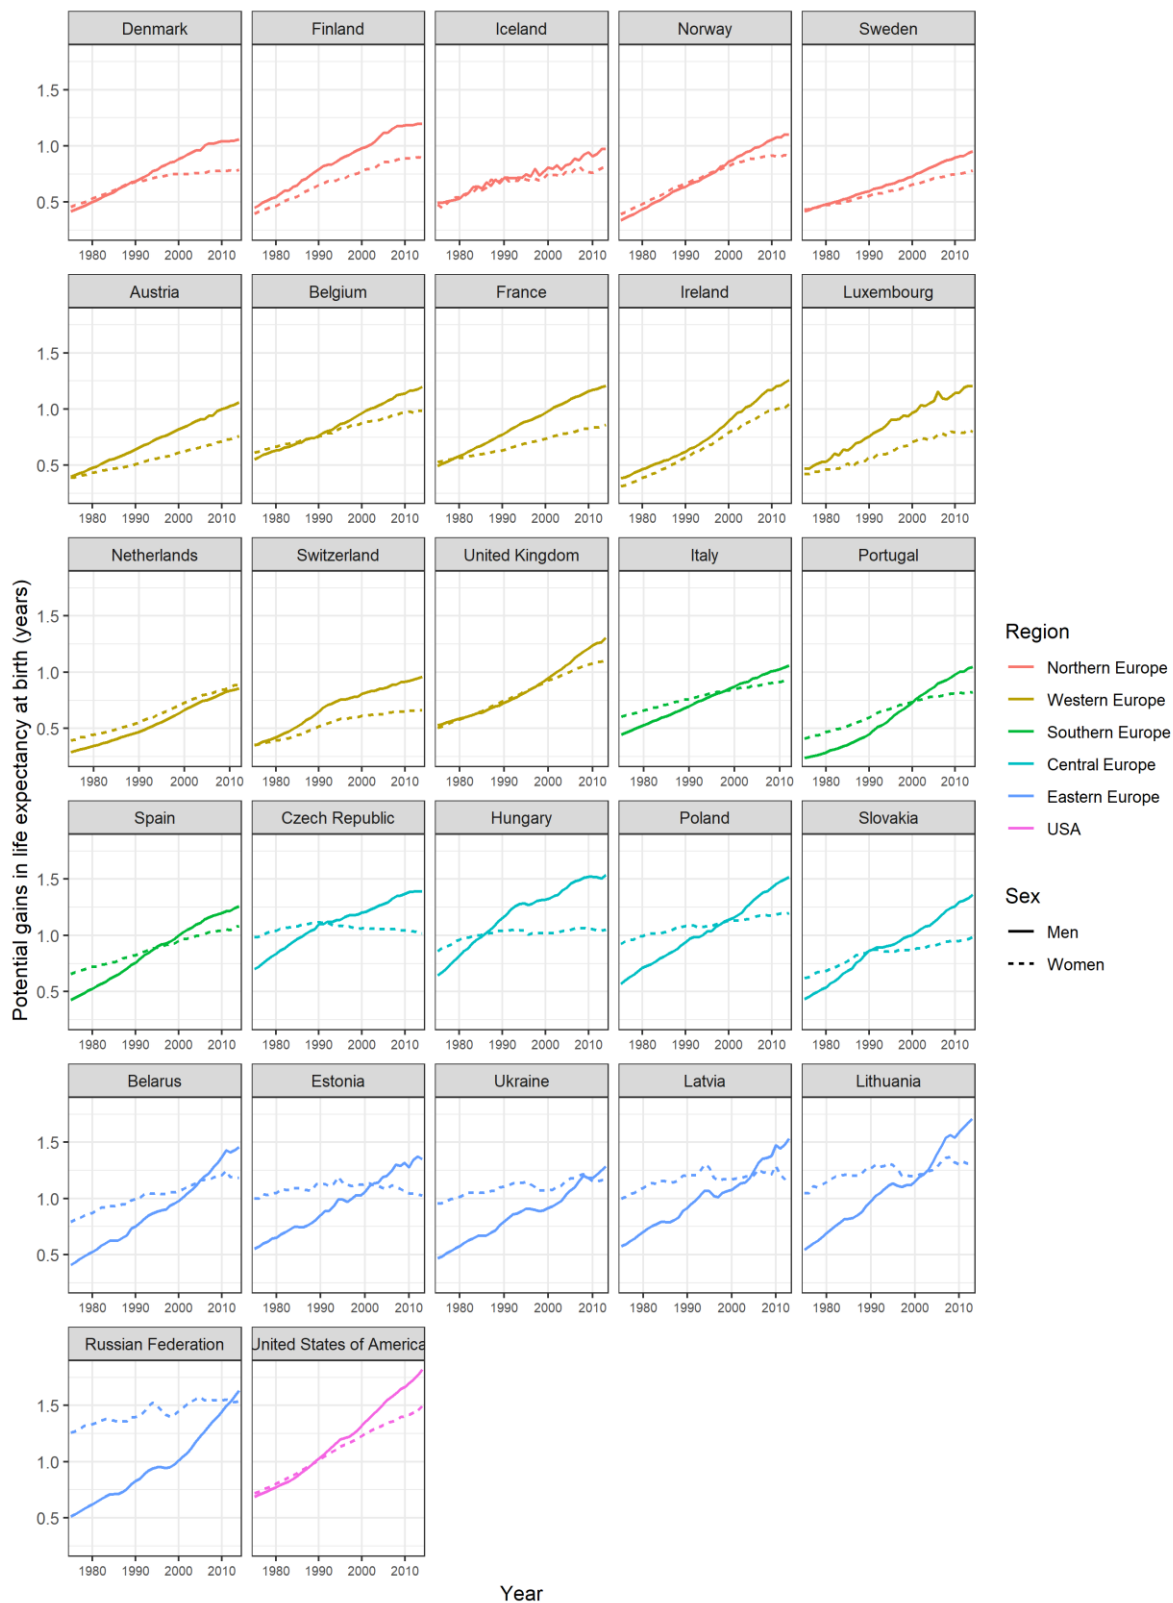

\* Countries within the same region are presented with the same colour

**Table S3: Age-standardised obesity prevalence and 95% confidence intervals, in 26 European countries (differentiating Western and Central Eastern Europe) and USA, 18-100 years in 2012.**

| Country                       | Age-standardised (stand.) obesity prevalence (%) |                          |            |                          |
|-------------------------------|--------------------------------------------------|--------------------------|------------|--------------------------|
|                               | Age-stand.                                       | 95% confidence intervals | Age-stand. | 95% confidence intervals |
|                               | Men                                              |                          | Women      |                          |
| <b>Central Eastern Europe</b> |                                                  |                          |            |                          |
| Belarus                       | 20.4                                             | 13.6; 28.5               | 25.4       | 17.7; 34.1               |
| Czech Republic                | 25.6                                             | 18.9; 33.4               | 25.2       | 18.3; 33.0               |
| Estonia                       | 21.0                                             | 16.0; 26.8               | 22.7       | 17.4; 28.8               |
| Hungary                       | 24.6                                             | 17.9; 32.0               | 22.1       | 15.4; 29.8               |
| Latvia                        | 22.2                                             | 15.2; 30.2               | 25.8       | 18.4; 34.5               |
| Lithuania                     | 23.8                                             | 16.9; 31.8               | 28.7       | 21.2; 37.1               |
| Poland                        | 23.6                                             | 18.0; 29.7               | 25.7       | 19.5; 32.5               |
| Russian Federation            | 20.4                                             | 14.8; 26.8               | 29.1       | 22.6; 36.2               |
| Slovakia                      | 22.2                                             | 15.7; 29.6               | 22.2       | 15.8; 29.6               |
| Ukraine                       | 17.7                                             | 11.2; 25.7               | 23.9       | 16.3; 32.5               |
| <b>Western Europe</b>         |                                                  |                          |            |                          |
| Austria                       | 21.1                                             | 14.7; 28.2               | 19.1       | 13.4; 25.5               |
| Belgium                       | 22.9                                             | 17.3; 29.1               | 22.7       | 17.1; 28.9               |
| Denmark                       | 21.3                                             | 15.5; 27.9               | 18.4       | 13.1; 24.5               |
| France                        | 22.6                                             | 16.3; 29.6               | 23.1       | 16.9; 29.9               |
| Finland                       | 22.3                                             | 17.1; 28.2               | 21.7       | 16.7; 27.3               |
| Ireland                       | 26.2                                             | 19.4; 33.8               | 26.0       | 19.5; 33.2               |
| Iceland                       | 22.3                                             | 15.6; 29.8               | 21.0       | 14.7; 28.3               |
| Italy                         | 22.3                                             | 17.0; 28.1               | 23.5       | 18.1; 29.6               |
| Luxembourg                    | 24.9                                             | 17.6; 32.9               | 20.7       | 14.3; 28.0               |
| Netherlands                   | 18.9                                             | 13.8; 24.5               | 20.3       | 15.3; 25.8               |
| Norway                        | 24.5                                             | 18.5; 31.2               | 23.7       | 18.0; 30.2               |
| Portugal                      | 19.6                                             | 13.8; 26.4               | 21.1       | 15.0; 28.1               |
| Spain                         | 24.2                                             | 18.5; 30.5               | 26.4       | 20.3; 32.8               |
| Sweden                        | 21.6                                             | 16.3; 27.4               | 19.8       | 14.7; 25.6               |
| Switzerland                   | 22.0                                             | 16.3; 28.3               | 18.6       | 13.1; 24.8               |
| United Kingdom                | 26.5                                             | 22.3; 31.2               | 29.1       | 24.8; 33.6               |
| <b>USA</b>                    | 33.4                                             | 27.5; 39.5               | 35.5       | 29.7; 41.5               |

**Table S4: Potential gains in life expectancy at age 50 (PGL e50) if obesity-attributable mortality was eliminated, own estimates and those by Preston et al.2011, in the same countries studied, in 2006**

| Country        | PGL e50 2006,<br>own estimates | PGL e50 2006,<br>Preston's<br>estimates | Difference |
|----------------|--------------------------------|-----------------------------------------|------------|
| <b>Men</b>     |                                |                                         |            |
| Austria        | 0.81                           | 1.00                                    | -0.19      |
| Belgium        | 0.95                           | 0.98                                    | -0.03      |
| Czech Republic | 1.14                           | 1.34                                    | -0.20      |
| Denmark        | 0.88                           | 0.82                                    | 0.06       |
| France         | 0.94                           | 0.99                                    | -0.05      |
| Italy          | 0.88                           | 0.90                                    | -0.02      |
| Netherlands    | 0.69                           | 0.73                                    | -0.04      |
| Poland         | 1.14                           | 1.37                                    | -0.23      |
| Spain          | 1.02                           | 1.15                                    | -0.13      |
| Sweden         | 0.75                           | 0.72                                    | 0.03       |
| Switzerland    | 0.77                           | 0.79                                    | -0.02      |
| United Kingdom | 0.99                           | 1.34                                    | -0.35      |
| USA            | 1.29                           | 1.85                                    | -0.56      |
| <b>Women</b>   |                                |                                         |            |
| Austria        | 0.62                           | 0.71                                    | -0.09      |
| Belgium        | 0.86                           | 0.73                                    | 0.13       |
| Czech Republic | 0.87                           | 1.01                                    | -0.14      |
| Denmark        | 0.71                           | 0.62                                    | 0.09       |
| France         | 0.72                           | 0.52                                    | 0.2        |
| Italy          | 0.84                           | 0.57                                    | 0.27       |
| Netherlands    | 0.76                           | 0.69                                    | 0.07       |
| Poland         | 1.08                           | 1.19                                    | -0.11      |
| Spain          | 0.95                           | 0.87                                    | 0.08       |
| Sweden         | 0.67                           | 0.63                                    | 0.04       |
| Switzerland    | 0.59                           | 0.50                                    | 0.09       |
| United Kingdom | 0.94                           | 1.23                                    | -0.29      |
| USA            | 1.18                           | 1.28                                    | -0.10      |



**Figure S3: Age-standardised obesity prevalence in 26 European countries\*, grouped by 5 regions and USA, 1975-2012, 18-100 years**

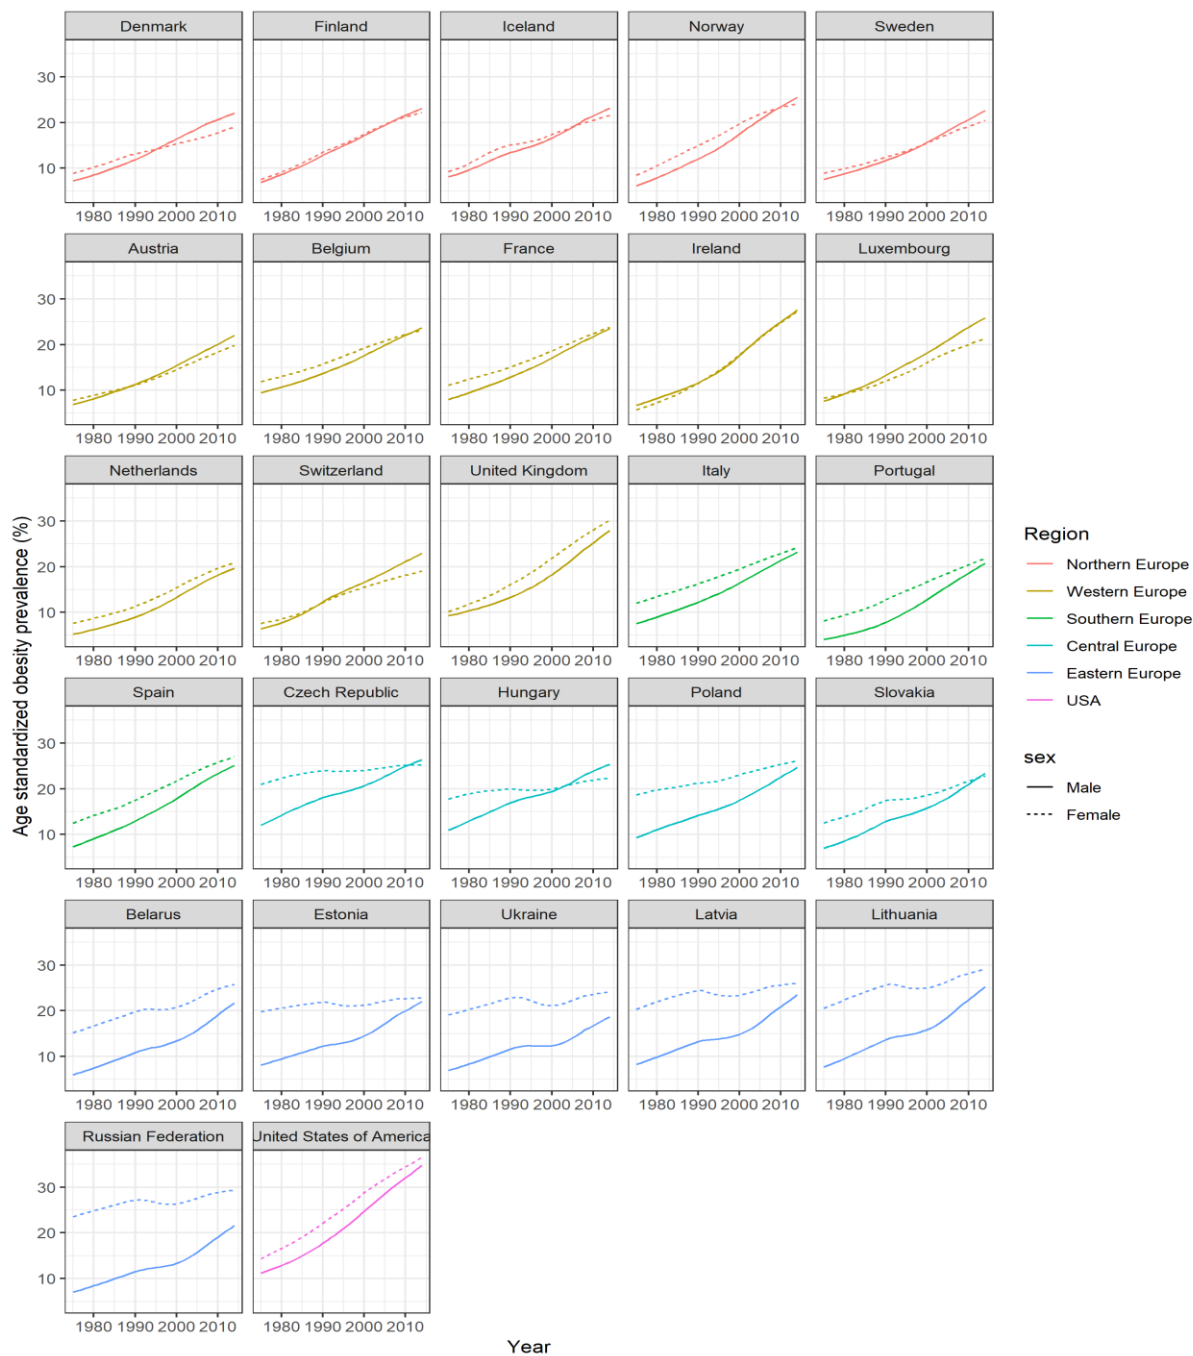

\* Countries within the same region are presented with the same colour

# BMJ Open

## Impact of obesity on life expectancy among different European countries: secondary analysis of population-level data over the 1975-2012 period

|                                 |                                                                                                                                                                                                                                                                                                                                                                                                                           |
|---------------------------------|---------------------------------------------------------------------------------------------------------------------------------------------------------------------------------------------------------------------------------------------------------------------------------------------------------------------------------------------------------------------------------------------------------------------------|
| Journal:                        | <i>BMJ Open</i>                                                                                                                                                                                                                                                                                                                                                                                                           |
| Manuscript ID                   | bmjopen-2018-028086.R2                                                                                                                                                                                                                                                                                                                                                                                                    |
| Article Type:                   | Research                                                                                                                                                                                                                                                                                                                                                                                                                  |
| Date Submitted by the Author:   | 25-Jun-2019                                                                                                                                                                                                                                                                                                                                                                                                               |
| Complete List of Authors:       | Vidra, Nikoletta; Population Research Centre, Faculty of Spatial Sciences, Demography<br>Trias-Llimós, Sergi; University of Groningen, Population Research Centre, Faculty of Spatial Sciences; London School of Hygiene and Tropical Medicine, Faculty of Epidemiology and Population Health<br>Janssen, Fanny; University of Groningen, Population Research Centre; Nederlands Interdisciplinair Demografisch Instituut |
| <b>Primary Subject Heading</b>: | Epidemiology                                                                                                                                                                                                                                                                                                                                                                                                              |
| Secondary Subject Heading:      | Public health, Nutrition and metabolism                                                                                                                                                                                                                                                                                                                                                                                   |
| Keywords:                       | EPIDEMIOLOGY, NUTRITION & DIETETICS, PUBLIC HEALTH                                                                                                                                                                                                                                                                                                                                                                        |
|                                 |                                                                                                                                                                                                                                                                                                                                                                                                                           |

SCHOLARONE™  
Manuscripts

1  
2  
3 1 **Impact of obesity on life expectancy among different European countries: secondary**  
4  
5 2 **analysis of population-level data over the 1975-2012 period**  
6  
7

8 3 Nikoletta Vidra<sup>1</sup>, Sergi Trias-Llimós<sup>1</sup>, Fanny Janssen<sup>1,2</sup>  
9

10  
11 4 <sup>1</sup> Population Research Centre, Faculty of Spatial Sciences, University of Groningen, Landlev  
12  
13  
14 5 1, 9747 AD Groningen, The Netherlands.  
15

16  
17 6 <sup>2</sup> Netherlands Interdisciplinary Demographic Institute, Lange Houtstraat 19, 2511 CV The  
18  
19  
20 7 Hague, The Netherlands.  
21

22  
23 8  
24  
25  
26 9 Corresponding author: Nikoletta Vidra, Population Research Centre, Faculty of Spatial  
27  
28  
29 10 Sciences, University of Groningen, PO Box 800, 9700 AV Groningen, The Netherlands. Tel:  
30  
31 11 0031 (0) 50 363 86 52; e-mail: n.vidra@rug.nl  
32

33 12

34  
35  
36 13

37  
38  
39  
40 14

41  
42  
43 15

44  
45  
46 16

47  
48  
49  
50 17

51  
52  
53 18

54  
55  
56 19

57  
58  
59 20 **Word count: 3669 words**  
60

1  
2  
3 21  
4  
5  
6 22**Abstract**

7  
8  
9 23 **Objective:** This study assesses the impact of obesity on life expectancy for 26 European  
10  
11  
12 24 national populations and the USA over the 1975-2012 period.

13  
14  
15 25 **Design:** Secondary analysis of population-level obesity and mortality data.

16  
17  
18 26 **Setting:** European countries, namely Austria, Belarus, Belgium, the Czech Republic,  
19  
20  
21 27 Denmark, Estonia, Finland, France, Hungary, Iceland, Ireland, Italy, Latvia, Lithuania,  
22  
23 28 Luxembourg, the Netherlands, Norway, Poland, Portugal, the Russian Federation, Slovakia,  
24  
25 29 Spain, Sweden, Switzerland, Ukraine, the United Kingdom (UK); and the USA.

26  
27  
28 30 **Participants:** National populations aged 18–100 years, by sex.

29  
30  
31 31 **Measurements:** Using data by age and sex, we calculated obesity-attributable mortality by  
32  
33 32 multiplying all-cause mortality (Human Mortality Database) with obesity-attributable  
34  
35 33 mortality fractions (OAMFs). OAMFs were obtained by applying the weighted-sum method  
36  
37 34 to obesity prevalence data (NCD Risk Factor Collaboration) and European Relative Risks (RRs)  
38  
39 35 (DYNAMO). We estimated potential gains in life expectancy at birth (PGLE) by eliminating  
40  
41 36 obesity-attributable mortality from all-cause mortality using associated single-decrement life  
42  
43 37 tables.

44  
45  
46 38 **Results:** In the 26 European countries in 2012, PGLE due to obesity ranged from 0.86 to 1.67  
47  
48 39 years among men, and from 0.66 to 1.54 years among women. In all countries, PGLE  
49  
50 40 increased over time, with an average annual increase of 2.68% among men and 1.33% and  
51  
52 41 among women. Among women in Denmark, Switzerland, and Central and Eastern European  
53  
54 42 countries, the increase in PGLE levelled off after 1995. Without obesity, the average increase  
55  
56  
57  
58  
59  
60

1  
2  
3 43 in life expectancy between 1975 and 2012 would have been 0.78 years higher among men  
4  
5  
6 44 and 0.30 years higher among women.  
7  
8

9 45 **Conclusions:** Obesity was proven to have an impact on both life expectancy levels and  
10  
11 46 trends in Europe. The differences found in this impact between countries and the sexes can  
12  
13 47 be linked to contextual factors, as well as to differences in people's ability and capacity to  
14  
15  
16 48 adopt healthier lifestyles.  
17  
18

19 49 **Keywords:** Obesity, life expectancy, Europe, USA  
20  
21

## 22 23 50 **Article Summary**

### 24 25 26 51 **Strengths and limitations of the study**

27  
28  
29 52 • This is the first study to assess the impact of obesity on life expectancy at birth over  
30  
31 53 time, and we do so here for 26 European countries and the USA.  
32  
33

34 54 • We used recent long-term comparable data on obesity prevalence based on  
35  
36  
37 55 population-based measurement studies, and European relative risks of dying from obesity by  
38  
39 56 age and sex from a recent meta-analysis.  
40  
41

42 57 • Because of remaining data limitations regarding prevalence and relative risks, we had  
43  
44  
45 58 to use a fairly simple – albeit common applied - methodology to estimate obesity-  
46  
47 59 attributable mortality.  
48  
49

50  
51 60

52  
53  
54 61

55  
56  
57 62

58  
59  
60 63

## 64 Introduction

65 Obesity is a global epidemic (1), with Europe currently ranking second worldwide after the  
66 USA (2). Over the last 20 years obesity prevalence has increased threefold in Europe(3),  
67 although not uniformly across countries (4). Estimates for 2014 indicate that obesity varied  
68 threefold across European countries, ranging from a low of 9% in Romania to a high of 26%  
69 in Malta (5). Obesity constitutes a serious health burden at the individual and population  
70 levels because it is associated with an increased risk of morbidity (6), and mortality (7).  
71 However, the potential impact of the increase in obesity on life expectancy trends remains  
72 largely unknown (8).

73 The few existing studies that assessed the impact of obesity on life expectancy at the  
74 population level provided estimates at one specific point in time only (9, 10). Olshansky et al.  
75 found that if obesity was eliminated, life expectancy at birth ( $e_0$ ) in the USA in 2000 would  
76 be 0.21 to 1.08 years higher, depending on gender and ethnicity (9). Preston et al. (10)  
77 estimated for 16 low-mortality countries in 2006 that the reduction in life expectancy at age  
78 50 ( $e_{50}$ ) due to obesity was greatest in the USA, at more than 1.5 years; and ranged from  
79 0.50 to 1.19 years for women and from 0.72 to 1.37 years for men in European countries.

80 Gaining insight into the impact of obesity on trends in life expectancy is especially  
81 relevant (11) given the marked differences in life expectancy trends across Europe (12). In  
82 Western European countries,  $e_0$  has been increasing steadily, and has risen six to eight years  
83 since 1970. But in Central and Eastern Europe (CEE),  $e_0$  stagnated or even declined between  
84 the 1970s and the 1980s, and did not start increasing again until the 1990s. There are also  
85 marked differences in  $e_0$  trends between individual European countries (12).

1  
2  
3 86 In light of these important differences between European countries in both obesity  
4  
5 87 prevalence and life expectancy over time, our aim is to assess the impact of obesity on long-  
6  
7  
8 88 term trends in life expectancy across a wide range of European countries.  
9

10  
11 89 Our sole focus is on the impact of obesity, given the significant health burden caused by  
12  
13 90 obesity, the large body of literature on its impact, and the well-documented association of  
14  
15  
16 91 obesity with mortality.  
17

## 18 19 92 **Data and Methods**

### 20 21 22 93 **Setting**

23  
24  
25 94 We studied the impact of obesity on life expectancy by sex over the 1975-2012 period in 26  
26  
27 95 European countries: Austria, Belarus, Belgium, the Czech Republic, Denmark, Estonia,  
28  
29 96 Finland, France, Hungary, Iceland, Ireland, Italy, Latvia, Lithuania, Luxembourg, the  
30  
31 97 Netherlands, Norway, Poland, Portugal, the Russian Federation, Slovakia, Spain, Sweden,  
32  
33 98 Switzerland, Ukraine, the United Kingdom (UK); and the USA as a comparison country (10).  
34  
35  
36  
37

### 38 99 **Data**

39  
40  
41 100 Long-term comparable obesity prevalence data ( $BMI \geq 30 \text{ kg/m}^2$ ) by country, sex, age (18-19,  
42  
43 101 20-24, ..., 85+), and year (1975-2012), based on 1698 population-based measurement studies,  
44  
45 102 were obtained from the NCD Risk Factor Collaboration study (13). These validated data  
46  
47 103 comprise the available measured height and weight data of 19.2 million participants from  
48  
49 104 representative data sources, supplemented with estimates based on information from other  
50  
51 105 years and related countries from a Bayesian hierarchical model (13). The same model was  
52  
53 106 applied to all countries and used as an input the measured weight and height data, including  
54  
55  
56 107 covariates that help predict BMI (13).  
57  
58  
59  
60

1  
2  
3 108 The age- (<50, 50-59, 60-69 and  $\geq 70$  years) and sex-specific relative risks (RRs) of  
4  
5  
6 109 dying from obesity (see Supplementary Material Table S1) came from a review of studies  
7  
8 110 mainly conducted in Western Europe and the USA, with the normal-weight category used as  
9  
10 111 the reference group ( $18.5 \leq \text{BMI} \leq 25 \text{ kg/m}^2$ ) (14). These age- and sex-specific RRs were largely  
11  
12  
13 112 in line with the overall European RR of 1.64 recently estimated by the Global BMI Mortality  
14  
15 113 Collaboration (7). The differences across age groups found in that study were similar with  
16  
17  
18 114 those reported in our findings (i.e., higher RRs at younger than at older ages), though they  
19  
20 115 were less distinct (7). In addition, the use of RRs with the normal weight category as the  
21  
22  
23 116 reference category is in line with previous studies that estimated obesity-attributable  
24  
25 117 mortality (15-19), while the estimation of obesity-attributable mortality with such a RR can  
26  
27  
28 118 be considered the theoretically maximally possible attributable mortality (20).

29  
30  
31 119 All-cause mortality numbers and exposure population data by single year of age, sex,  
32  
33 120 year, and country were obtained from the Human Mortality Database (21). These data are of  
34  
35  
36 121 high quality and are widely used within the demographic community and beyond (22).

### 37 38 39 122 **Patient and Public Involvement**

40  
41  
42 123 No patients were involved in this study.

### 43 44 45 124 **Methods**

46  
47  
48  
49 125 We performed our analyses separately by country and sex, based on data by single year of  
50  
51 126 age (18-100). The obesity prevalence data were turned into single-age prevalence (18-100)  
52  
53  
54 127 by applying Loess smoothing (23). The RRs were turned into single-year RRs (18- 100) using  
55  
56 128 linear regression.



1  
2  
3 129 To estimate the obesity-attributable mortality fraction (OAMF) – i.e., the share of all-  
4  
5  
6 130 cause mortality due to obesity – we used the Rockhill formula to estimate OAMFs by age (a)  
7  
8 131 and sex (s) (24).

$$11 \quad 132 \quad OAMF_{a,s} = \frac{P_{a,s} \cdot (RR_{a,s} - 1)}{1 + (P_{a,s} \cdot (RR_{a,s} - 1))} \text{(Equation 1)}$$

13  
14  
15  
16 133 where  $P$  is the obesity prevalence. We then weighted the  $OAMF_{a,s}$  with the corresponding  
17  
18 134 number of deaths.

19  
20  
21 135 For the estimation of the impact of obesity on life expectancy (see 2.3.2) we needed  
22  
23  
24 136 age-and sex-specific (non-) obesity-attributable mortality rates. These were obtained by  
25  
26 137 multiplying  $OAMF_{a,s}$  and  $[1 - OAMF_{a,s}]$ , respectively, with age- and sex-specific all-cause  
27  
28 138 mortality rates.

29  
30  
31 139 To ensure comparability across countries, over time, and between men and women,  
32  
33  
34 140 we applied direct age- and sex-standardisation (25) to obesity prevalence, obesity-  
35  
36 141 attributable mortality fractions, and obesity-attributable mortality rates, using the European  
37  
38 142 population of 2011 (26) as the standard.

39  
40  
41  
42 143 To assess the impact of adult obesity on  $e_0$ , we calculated for each country the  
43  
44 144 potential gain in life expectancy (PGLE) if obesity-attributable mortality were eliminated, by  
45  
46 145 calendar year and sex and is in line with the approach by Preston et al. First, we calculated  $e_0$   
47  
48 146 by applying standard life table techniques to age-specific all-cause mortality rates (0-  
49  
50 147 100)(25)). Second, we applied associated single-decrement life tables (ASDLT)(25)) to age-  
51  
52 148 and sex-specific non-obesity-attributable mortality rates (0-100) to obtain  $e_0$  if obesity-  
53  
54 149 attributable mortality were eliminated. The PGLE represents the difference between the  $e_0$   
55  
56 150 based on the ASDLT and the original  $e_0$ .

1  
2  
3 151 To summarise the changes in PGLE across countries, we estimated the average  
4  
5  
6 152 annual changes in PGLE (in %):  
7  
8

9  
10  
11  
12 153 
$$\text{Average annual changes in PGLE (\%)} = \frac{\sum_{t=1976}^{2012} \frac{(PGLE_t - PGLE_{t-1})}{PGLE_{t-1}}}{2012 - 1975} 100$$
  
13  
14  
15

16 154 To assess the impact of obesity on time trends in  $e_0$  between 1975 and 2012, we  
17  
18 155 subtracted the observed change in  $e_0$  from the change in  $e_0$  without obesity. The change in  
19  
20  
21 156  $e_0$  without obesity was obtained by using the  $e_0$  values from the associated single-decrement  
22  
23 157 life tables applied to non-obesity-attributable mortality for 1975 and 2012.  
24  
25

## 26 158 **Results**

27  
28  
29 159 For the 26 European countries, the age-standardised obesity-attributable mortality fraction  
30  
31  
32 160 (OAMF) was, on average, 11% among men and 10% among women in 2012. For the USA,  
33  
34 161 these estimates were substantially higher; i.e., 15% and 14%, respectively. The average  
35  
36  
37 162 OAMF levels were higher in Northern, Western, and Southern Europe combined (hereafter,  
38  
39 163 Western Europe) than in CEE among men, while the opposite was the case among women.  
40  
41

42 164 OAMFs were increasing over time for all countries and both sexes, although not to  
43  
44  
45 165 the same extent (see Figure 1, Figure S1). In Western Europe, OAMFs generally increased  
46  
47 166 over the 1975-2012 period, and at a faster pace among men. In CEE, by contrast, OAMFs  
48  
49  
50 167 clearly stagnated, and even declined between 1990 and 2000. The overall increase in OAMFs  
51  
52 168 was greatest in the USA, Ireland, Norway (men), and the UK (women).  
53  
54  
55  
56  
57  
58  
59  
60

169

1  
2  
3 170 **Figure 1: Age-standardised obesity-attributable mortality fractions in 26 European**  
4  
5 171 **countries\* (by 5 regions) and USA, 1975-2014, 18-100 years**

6  
7  
8  
9 172 \* Countries within the same region are presented with the same colour

10 173 **Central Europe:** Czech Republic, Hungary, Poland, Slovakia

11  
12 174 **Eastern Europe:** Belarus, Estonia, Ukraine, Latvia, Lithuania, Russian Federation

13  
14 175 **Northern Europe:** Denmark, Finland, Iceland, Norway, Sweden

15  
16 176 **Southern Europe:** Italy, Portugal, Spain

17  
18 177 **Western Europe:** Austria, Belgium, France, Ireland, Luxembourg, Netherlands, Switzerland,  
19  
20 178 United Kingdom

21 179 **USA:** United States of America

22  
23 180

24  
25  
26  
27 181 <approximately here>

28  
29  
30 182 In the 26 European countries in 2012, estimates of potential gains in life expectancy at  
31  
32 183 birth (PGLE) if obesity was eliminated ranged from 0.86 to 1.67 years among men (1.22 on  
33  
34 184 average) and from 0.66 to 1.54 years (0.98 on average) among women (Figure 2; Figure S2  
35  
36 185 and Table S2 Supplementary Material). Among men in the USA, the PGLE estimate was, at  
37  
38 186 1.73 years, slightly higher than the highest estimate in Europe; and among women in the  
39  
40 187 USA, the PGLE estimate was, at 1.44 years, the second-highest after the estimate for Russia.  
41  
42  
43  
44 188 The average PGLE estimate was 1.08 among men and 0.86 among women in Western  
45  
46 189 Europe, and was 1.44 among men and 1.16 among women in CEE (see Supplementary  
47  
48  
49 190 Material, Table S2).

50  
51  
52  
53 191  
54  
55  
56  
57  
58  
59  
60

1  
2  
3 192 **Figure 2: Potential gains in life expectancy at birth (PGLE) if obesity-attributable mortality**  
4  
5 193 **was eliminated, in 26 European countries\* (differentiating Western and Central Eastern**  
6  
7  
8 194 **Europe) and the USA, 1975-2012**  
9

10  
11 195 \* Countries within the same region are presented with the same colour

12  
13 196 **Central Eastern Europe:** Belarus, Czech Republic, Estonia, Hungary, Latvia, Lithuania, Poland,  
14  
15 197 Russian Federation, Slovakia, Ukraine

16  
17 198 **Western Europe:** Austria, Belgium, Denmark, Finland, France, Iceland, Ireland, Italy,  
18  
19 199 Luxembourg, Netherlands, Norway, Portugal, Spain, Sweden, Switzerland, United Kingdom

20  
21 200 **USA:** United States of America  
22

23 201  
24

25  
26 202 <approximately here>  
27

28  
29 203 Overall, from 1975 to 2012, PGLE due to obesity increased in all of the countries (Figure  
30  
31 204 2, Figure S2, Figure 3, 4). The increase was greater among men (average annual increase of  
32  
33 205 2.68%) than among women (average annual increase of 1.33%), was largest among men in  
34  
35 206 Portugal and Belarus and among women in Portugal, and was substantial among men and  
36  
37 207 women in Norway (Figures 3, 4). While there was a general increase in PGLE due to obesity,  
38  
39 208 this trend stagnated among women in CEE from around 1990 onwards, and levelled off after  
40  
41 209 1995 among women in Denmark and Switzerland.  
42  
43  
44  
45  
46

47 210 **Figure 3: Average annual increase (%) in potential gains in life expectancy due to obesity in**  
48  
49 211 **26 European countries and the USA between 1975-2012, in men**

50  
51 212 <approximately here>  
52

53  
54 213  
55

56 214 **Figure 4: Average annual increase (%) in potential gains in life expectancy due to obesity in**  
57  
58 215 **26 European countries and the USA between 1975-2012, in women**

59  
60 216 <approximately here>

217 Table 1 shows the impact of obesity on time trends in life expectancy at birth ( $e_0$ ).

218 Overall, the average increase in  $e_0$  between 1975 and 2012 was 7.26 years for men and 6.28

219 years for women in the 26 European countries. Without obesity, the average increase in  $e_0$

220 would have been 8.04 years for men and 6.58 years for women; or 0.78 and 0.30 years

221 higher, respectively. Among men, obesity had the greatest impact on  $e_0$  trends in Lithuania

222 and the USA (more than one year), and the smallest impact in Iceland and Sweden (0.5

223 years). Among women, obesity had the greatest impact on  $e_0$  trends in the USA and Ireland

224 (0.7 years) and the smallest impact in Estonia and the Czech Republic (less than 0.1 year).

225 **Table 1: Impact of obesity on trends in life expectancy at birth ( $e_0$ ) in 26 European**

226 **countries and USA 1975-2012, by sex**

| Country        | Change in $e_0$ with obesity 2012-1975 (years) |       | Change in $e_0$ without obesity 2012-1975 (years) |       | Effect of obesity on $e_0$ change 2012-1975 (years) |       |
|----------------|------------------------------------------------|-------|---------------------------------------------------|-------|-----------------------------------------------------|-------|
|                | Men                                            | Women | Men                                               | Women | Men                                                 | Women |
|                | Austria                                        | 10.62 | 8.61                                              | 11.25 | 8.95                                                | 0.63  |
| Belarus        | -0.55                                          | 1.43  | 0.46                                              | 1.83  | 1.00                                                | 0.40  |
| Belgium        | 8.85                                           | 7.63  | 9.46                                              | 7.99  | 0.61                                                | 0.36  |
| Czech Republic | 7.97                                           | 6.98  | 8.66                                              | 7.03  | 0.69                                                | 0.05  |
| Denmark        | 6.78                                           | 5.03  | 7.40                                              | 5.36  | 0.63                                                | 0.33  |
| Estonia        | 6.43                                           | 6.42  | 7.26                                              | 6.46  | 0.82                                                | 0.04  |
| France         | 9.49                                           | 7.99  | 10.17                                             | 8.30  | 0.68                                                | 0.31  |
| Finland        | 10.07                                          | 7.26  | 10.82                                             | 7.75  | 0.74                                                | 0.50  |
| Hungary        | 5.29                                           | 6.18  | 6.17                                              | 6.36  | 0.87                                                | 0.18  |
| Iceland        | 9.02                                           | 5.19  | 9.51                                              | 5.51  | 0.48                                                | 0.32  |
| Ireland        | 9.40                                           | 8.40  | 10.22                                             | 9.10  | 0.83                                                | 0.69  |
| Italy          | 10.19                                          | 8.56  | 10.81                                             | 8.89  | 0.62                                                | 0.33  |
| Latvia         | 4.91                                           | 4.53  | 5.82                                              | 4.70  | 0.90                                                | 0.18  |
| Lithuania      | 2.01                                           | 3.80  | 3.14                                              | 4.06  | 1.13                                                | 0.26  |
| Luxembourg     | 11.78                                          | 9.27  | 12.50                                             | 9.65  | 0.72                                                | 0.37  |
| Netherlands    | 7.68                                           | 5.10  | 8.26                                              | 5.6   | 0.56                                                | 0.49  |
| Norway         | 7.70                                           | 5.33  | 8.42                                              | 5.86  | 0.74                                                | 0.51  |
| Poland         | 5.90                                           | 6.74  | 6.81                                              | 7.00  | 0.91                                                | 0.27  |
| Portugal       | 12.14                                          | 10.87 | 12.91                                             | 11.26 | 0.77                                                | 0.40  |

|    |                                  |      |      |       |      |      |      |
|----|----------------------------------|------|------|-------|------|------|------|
| 3  | Russian Federation               | 2.05 | 2.62 | 3.06  | 2.89 | 1.02 | 0.28 |
| 4  | Slovakia                         | 5.65 | 5.82 | 6.52  | 6.16 | 0.88 | 0.34 |
| 5  | Spain                            | 8.82 | 8.75 | 9.62  | 9.14 | 0.79 | 0.39 |
| 6  | Sweden                           | 7.69 | 5.59 | 8.18  | 5.93 | 0.49 | 0.33 |
| 7  | Switzerland                      | 8.98 | 6.63 | 9.55  | 6.93 | 0.58 | 0.30 |
| 8  | Ukraine                          | 0.48 | 1.73 | 1.26  | 1.94 | 0.78 | 0.21 |
| 9  | United Kingdom                   | 9.46 | 6.96 | 10.20 | 7.55 | 0.74 | 0.59 |
| 10 | USA                              | 7.86 | 4.89 | 8.90  | 5.61 | 1.04 | 0.71 |
| 11 | <b>Average CEE countries</b>     | 4.01 | 4.63 | 4.92  | 4.84 | 0.90 | 0.22 |
| 12 | <b>Average Western countries</b> | 9.10 | 7.09 | 9.76  | 7.50 | 0.66 | 0.41 |

227

228

## 229 Discussion

### 230 Summary of results

231 In the 26 European countries studied, the share of mortality due to obesity in 2012 was, on  
 232 average, 11% among men and 10% among women. PGLE due to obesity in 2012 ranged from  
 233 0.86 to 1.73 years among men, and from 0.66 to 1.54 years among women. Overall, PGLE  
 234 increased between 1975 and 2012, albeit more quickly among men (average annual  
 235 increase: 2.68%) than among women (1.33%). Among women in Denmark, Switzerland, and  
 236 the CEE countries the increase in PGLE levelled off after 1995. Without obesity, the average  
 237 increase in  $e_0$  between 1975 and 2012 would have been 0.78 years higher among men and  
 238 0.30 years higher among women.

### 239 Evaluation of data and methods

240 Using the recent advances in obesity data, it is now possible to study the impact of obesity  
 241 on life expectancy for a large number of countries and a long period of time. Two  
 242 methodological issues warrant our attention, however.

1  
2  
3 243 First, in calculating the share of mortality due to obesity (OAMF), which also forms  
4  
5 244 the basis for our PGLC calculations, we were hindered by limitations in the available  
6  
7  
8 245 prevalence and RRs data, which also affected the method used. As has previously been  
9  
10 246 documented, OAMF estimates are sensitive to the data and the methods used (27).

11  
12  
13 247 In selecting obesity prevalence data, we used the longest validated time series based  
14  
15 248 on population-based measurement studies that are suitable for studying the impact of  
16  
17  
18 249 obesity on long-term life expectancy trends across Europe (13). For those countries with less  
19  
20 250 available obesity data – especially the CEE countries a portion of the data we used were  
21  
22 251 merely the result of modelling. Thus, the resulting estimates should be treated with some  
23  
24  
25 252 caution . By contrast, for the non-CEE countries, most of the data we used pertain to  
26  
27  
28 253 measured data (13). Supplementary Material, Table S3 gives the confidence intervals around  
29  
30 254 the age-standardised prevalence estimates for each country by sex in order, as to provide  
31  
32 255 more information on the relative reliability of the data for the different countries in our  
33  
34  
35 256 analysis.

36  
37 257 Because age- and sex-specific RRs of mortality associated with obesity are not readily  
38  
39 258 available by country and year, we have decided to apply to all of the countries studied age-  
40  
41  
42 259 and sex-specific RRs from Western European and US populations that are largely suitable for  
43  
44  
45 260 our setting, as had previously been done (10). Although RRs could differ slightly across  
46  
47 261 contexts, studies that compared RRs across continents found only small differences in RRs  
48  
49  
50 262 between Europe and North America (7). Consequently, we do not expect to observe large  
51  
52 263 differences between individual countries. In addition, as time-variant European RRs were  
53  
54 264 not available, we had to apply time-constant RRs, even though it is possible that changes in  
55  
56  
57 265 the association of obesity with mortality – which could, for example, occur because of  
58  
59 266 improvements in the treatment of chronic diseases – have affected the impact of obesity on  
60

1  
2  
3 267 life expectancy. Previous studies that assessed changes over time in the association of  
4  
5 268 obesity with mortality did so only for the US, and, unfortunately, provided mixed evidence,  
6  
7  
8 269 with some of these studies reporting a decline (18, 28, 29), and others finding an increase  
9  
10 270 (30). Therefore, before implementing time-variant European RRs, more information on their  
11  
12  
13 271 direction is required. Similarly, comparable country-specific RRs are urgently needed. In  
14  
15 272 addition, the choice of these RRs along with their reference group might exert an effect in  
16  
17  
18 273 our estimates. Based on the available data, only a fairly simple – albeit common applied –  
19  
20 274 the weighted sum method could be applied (27) to estimate the OAMFs. The application of a  
21  
22  
23 275 more advanced methodology (27) could have affected the OAMFs and thus the PGLE levels,  
24  
25 276 but less the trends(31). The lack of information on the uncertainty of the RRs we used  
26  
27  
28 277 limited us in estimating confidence intervals for the OAMFs and PGLEs.

29  
30 278 Second, besides being the result of the OAMFs, the PGLE estimates can also be  
31  
32 279 affected by all-cause mortality levels and trends as age- and sex-specific all-cause mortality  
33  
34  
35 280 rates are used to estimate PGLE. Since all-cause mortality fluctuated greatly in CEE in the  
36  
37 281 analysed period (12), short-term variations in PGLE in CEE countries should be treated with  
38  
39  
40 282 more caution.

### 41 42 283 **Explanation of results**

43  
44  
45 284 In 2012, the PGLE due to obesity were, on average, 1.22 years for men and 0.98  
46  
47  
48 285 years for women in the 26 European countries, and 1.73 years for men and 1.43 years for  
49  
50 286 women in the USA. A comparison of our 2006 e50 estimates with those of Preston et al. (10)  
51  
52  
53 287 for the same countries uncovered only small differences, except among men in the USA (our  
54  
55 288 estimate was 0.56 years lower) and women in the UK (our estimate was 0.29 years lower)  
56  
57  
58 289 (see Supplementary Material, Table S4). Given that approximately the same methodology  
59  
60 290 was used to estimate the OAMFs, the observed differences are most likely due to the use of



1  
2  
3 291 different obesity prevalence and RRs data. Preston used prevalence data from national  
4  
5 292 representative surveys and RRs from the Prospective Studies collaboration (10). Given that  
6  
7  
8 293 the observed differences do not have the same direction for the different countries, we  
9  
10 294 believe that these differences are mainly attributable to the prevalence data used. To  
11  
12  
13 295 further evaluate our observed PGLE levels, we compared them with own PGLE estimates for  
14  
15 296 smoking and alcohol (32). Our PGLE estimates for smoking were 2.38 years for men and 1.00  
16  
17  
18 297 year for women in Western Europe, and 3.82 years for men and 0.67 years for women in  
19  
20 298 CEE. Our PGLE estimates for alcohol were 0.90 years for men and 0.44 years for women in  
21  
22  
23 299 Western Europe, and 2.15 years for men and 1.00 year for women in CEE (32) while our  
24  
25 300 average PGLE for obesity was 1.08 among men and 0.86 among women in Western Europe,  
26  
27  
28 301 and 1.44 among men and 1.16 among women in CEE. Thus, obesity's impact on life  
29  
30 302 expectancy lies between that of smoking and alcohol, and can be considered significant.

31  
32  
33 303 In our study, we found that PGLE due to obesity was increasing, but that this trend  
34  
35  
36 304 differed across countries and between the sexes. This overall trend can be explained by the  
37  
38 305 general increase in obesity prevalence in European countries (see Supplementary Material,  
39  
40 306 Figure S3) (13) and the resulting growth in the burden of obesity (3), which is also reflected  
41  
42  
43 307 in the OAMFs (Figure 1, Figure S1) in these countries.

44  
45  
46 308 At the same time, parts of the observed variation in the increase in PGLE estimates  
47  
48  
49 309 across the USA, Western Europe, and CEE and between the sexes reflect differences in the  
50  
51 310 onset, the development, and the impact of the obesity epidemic in these countries and in  
52  
53  
54 311 men and women. Across the countries studied, the absolute increase in PGLE was largest  
55  
56 312 among women and second-largest among men in the USA. This pattern is in line with  
57  
58 313 evidence showing that between 1980 and 2008, obesity increased much more in the USA  
59  
60

1  
2  
3 314 than in Europe(1, 33). This rapid progression of the obesity epidemic in the USA and its large  
4  
5 315 impact on life expectancy has been attributed to an increasingly obesogenic environment  
6  
7  
8 316 caused by factors such as changes in food preparation and processes that promote the  
9  
10 317 consumption of calorically dense foods, and a pronounced decrease in physical activity levels  
11  
12  
13 318 (34). The obesity epidemic has progressed more slowly in Western Europe than in the USA(1,  
14  
15 319 13). However, obesity levels in countries like the UK and Ireland are rapidly approaching  
16  
17  
18 320 those in the USA (35), as our PGLLE estimates also show.

21 321 In the CEE countries, the PGLLE trends track the evolution of the obesity epidemic in  
22  
23 322 that region (see Supplementary Material, Figure S3). Obesity levels have been higher in CEE  
24  
25  
26 323 than in Western Europe since 1980 (36, 37), which suggests that the epidemic started earlier  
27  
28 324 in CEE. As a result of this earlier onset, the impact of obesity (as expressed in terms of OAMF  
29  
30  
31 325 and PGLLE) in the 1970s and 1980s was at times even greater in CEE than in the USA,  
32  
33 326 especially among women. While there are many potential explanations for this early onset  
34  
35  
36 327 of the obesity epidemic in CEE, the available data indicate that the main factors were the  
37  
38 328 relatively high total energy supply and energy intake in CEE in those years (38).

41 329 The overall progress of the obesity epidemic was lower in CEE than in Western  
42  
43 330 Europe, and the increase was not constant (1). Indeed, in CEE, increases in obesity  
44  
45  
46 331 prevalence(1, 39), OAMFs, and PGLLE stagnated in the 1980-2008 period, and were more  
47  
48  
49 332 pronounced in the 1990s (1, 39). However, as these countries started the study period with  
50  
51 333 higher obesity prevalence levels, these trends resulted in the CEE having higher average  
52  
53  
54 334 PGLLE levels than the West. The pattern of stagnation observed in the CEE, could be  
55  
56 335 explained by the decrease in energy supplies at the beginning of the 1990s in CEE (37)  
57  
58 336 resulting from the dramatic economic and political changes in those countries (3, 36, 39) and  
59  
60

1  
2  
3 337 which in turn affected the socio-economic status of the population (SES). Among CEE  
4  
5  
6 338 women, the increase in obesity starting in the 1990s was smaller than it was in the previous  
7  
8 339 period, and was smaller than it was among CEE men. The lower risk of obesity observed  
9  
10 340 among women than among men with low socioeconomic status (SES) in low-income  
11  
12  
13 341 countries (40) may explain this difference.  
14  
15

16 342 In Western Europe, a stagnation in PGLLE levels was observed among women in  
17  
18 343 Denmark and Switzerland after 1995. This finding seems to be in line with studies reporting a  
19  
20 344 levelling-off of mean BMI since the 1990s (41); and in specific sub-populations, such as  
21  
22 345 adults with high SES in regions within Switzerland, Italy, France, and Finland  
23  
24 346 (37). Although dietary and physical activity information is spreading equally across  
25  
26 347 socioeconomic groups, those with higher SES have a greater ability and capacity to adopt a  
27  
28 348 healthier dietary and physical activity pattern (42). In addition, it appears that higher SES  
29  
30 349 women in particular are more health-conscious, have healthier food habits, and are more  
31  
32 350 prone to follow nutritional recommendations (43) as they are under greater social pressure  
33  
34 351 to be thin (44). Similarly, countries with higher income levels and lower levels of inequality  
35  
36 352 (45), like Switzerland and Denmark, tend to have lower obesity levels, especially among  
37  
38 353 women.  
39  
40  
41  
42  
43  
44  
45

46 354 When we considered the impact of obesity on life expectancy in the 26 European  
47  
48 355 countries, we found that without obesity, the increase in e0 between 1975 and 2012 would  
49  
50 356 have been, on average, 0.78 years higher among men and 0.30 years higher among women.  
51  
52 357 These figures account for approximately 10% of the average change in e0 between 1975 and  
53  
54 358 2012 among men, and 5% among women. It is therefore clear that the impact of obesity on  
55  
56 359 changes in e0 should not be ignored. Moreover, the impact of obesity on life expectancy  
57  
58  
59  
60

1  
2  
3 360 levels and on life expectancy trends is likely to increase, as previous studies have also  
4  
5 361 suggested (8). There are several indicators pointing in that direction, including evidence that  
6  
7  
8 362 obesity's impact is already substantially greater in the USA (13% among men and 15%  
9  
10 363 among women) than elsewhere; obesity prevalence is increasing rapidly in most European  
11  
12 364 countries (see Supplementary Material, Figure S3); obesity is increasing in severity; and the  
13  
14  
15 365 duration of obesity is rising in younger generations (8).

### 366 **Conclusion and implications**

367 Obesity was proven to have an impact on both life expectancy levels and trends in  
368 Europe. The observed differences in the increase in the impact of obesity across countries  
369 and between the sexes reflect differences in the onset and the progression of the obesity  
370 epidemic, and can be linked to contextual factors (economic conditions, obesogenic  
371 environment, energy supplies), as well as to differences in people's ability and capacity to  
372 adopt healthier lifestyles.

373 It is likely that in the future obesity will have a larger impact on mortality and life  
374 expectancy in Europe, as obesity prevalence and obesity-attributable mortality continue to  
375 increase in the majority of countries. These trends will have important health, economic,  
376 and social implications. Specifically, the increasing prevalence of obesity among European  
377 populations, and especially at younger ages, will lead to an increased prevalence of obesity-  
378 related disorders, as well as to increases in the mortality burden associated with obesity and  
379 in obesity's effects on life expectancy and quality of life. Thus, obesity will constitute an  
380 additional burden for societies, economies, and public health. It is therefore crucial that  
381 effective public health initiatives are undertaken to tackle the obesity epidemic and its  
382 effects on public health. Such initiatives should address the multifactorial and complex

1  
2  
3 383 obesity aetiology; the clear differences between countries and the sexes; as well as the  
4  
5 384 factors underlying these differences, such as contextual factors and differences in  
6  
7  
8 385 individuals' ability and capacity to adopt healthier lifestyles.  
9

#### 10 11 386 **Funding**

12  
13  
14 387 This work was supported by the Netherlands Organisation for Scientific Research (NWO) in  
15  
16 388 connection with the research programme "Smoking, alcohol, and obesity, ingredients for  
17  
18 389 improved and robust mortality projections, grant no. 452-13-001; see  
19  
20 390 [www.futuremortality.com](http://www.futuremortality.com).  
21  
22  
23  
24

25 391

#### 26 27 28 392 **Conflict of Interest**

29  
30  
31 393 None declared.  
32  
33  
34

35 394

#### 36 37 38 395 **Author contribution**

39  
40  
41  
42 396 N.Vidra contributed to the conception and design of the work; to the acquisition, analysis,  
43  
44 397 and interpretation of data for the work; drafted and revised the work critically for important  
45  
46 398 intellectual content; approved the final version of the work to be published and agrees to be  
47  
48 399 accountable for all aspects of the work in ensuring that questions related to the accuracy or  
49  
50 400 integrity of any part of the work are appropriately investigated and resolved.  
51  
52  
53  
54

55 401 S. Trias-Llimós contributed to the analysis, and interpretation of data for the work; revised it  
56  
57 402 critically for important intellectual content; approved the final version of the work to be  
58  
59  
60

1  
2  
3 403 published and agrees to be accountable for all aspects of the work in ensuring that questions  
4  
5 404 related to the accuracy or integrity of any part of the work are appropriately investigated  
6  
7  
8 405 and resolved.  
9

10  
11 406 F. Janssen contributed to the conception and design of the work; to the interpretation of  
12  
13 407 data for the work; revised the work critically for important intellectual content; approved  
14  
15 408 the final version of the work to be published and agrees to be accountable for all aspects of  
16  
17 409 the work in ensuring that questions related to the accuracy or integrity of any part of the  
18  
19 410 work are appropriately investigated and resolved.  
20  
21  
22

#### 23 24 25 411 **Data statement**

26  
27  
28 412 Obesity prevalence data can be obtained from NCD Risk Factor Collaboration (NCD-RisC)  
29  
30 413 ([www.ncdrisc.org](http://www.ncdrisc.org)).

31  
32  
33  
34 414 All-cause mortality and exposure population data can be obtained from the Human  
35  
36 415 Mortality Database (<http://www.mortality.org>).

#### 37 38 39 40 416 **Acknowledgements**

41  
42  
43  
44 417 The authors are grateful to Professor Majid Ezatti and Dr James Bentham (Faculty of  
45  
46 418 Medicine, School of Public Health at Imperial College London); Dr Gretchen A. Stevens  
47  
48 419 (World Health Organization); and the NCD Risk Factor Collaboration (NCD-RisC)  
49  
50 420 ([www.ncdrisc.org](http://www.ncdrisc.org)) for sharing the obesity data.

51  
52  
53  
54 421 This work is financed by the Netherlands Organisation for Scientific Research (NWO) as part  
55  
56 422 of the research programme "Smoking, alcohol, and obesity, ingredients for improved and  
57  
58 423 robust mortality projections, grant no. 452-13-001. See [www.futuremortality.com](http://www.futuremortality.com)

424

425

426 **References**

427 1. Finucane MM, Stevens GA, Cowan MJ, Danaei G, Lin JK, Paciorek CJ, et al. National,  
428 regional, and global trends in body-mass index since 1980: systematic analysis of health  
429 examination surveys and epidemiological studies with 960 country-years and 9.1 million  
430 participants. *Lancet*. 2011 Feb 12;377(9765):557-67.

431 2. Overweight and obesity - BMI statistics [Internet].; 2017 []. Available from:  
432 [http://ec.europa.eu/eurostat/statistics-explained/index.php/Overweight\\_and\\_obesity -](http://ec.europa.eu/eurostat/statistics-explained/index.php/Overweight_and_obesity_-_BMI_statistics)  
433 [\\_BMI\\_statistics](http://ec.europa.eu/eurostat/statistics-explained/index.php/Overweight_and_obesity_-_BMI_statistics).

434 3. WHO. The challenge of Obesity in the WHO European Region and the Strategies for  
435 Response: Summary. Copenhagen: World Health Organization, Regional Office for Europe;  
436 2007.

437 4. Seidell JC. Prevalence and time trends of obesity in Europe. *Journal of endocrinological*  
438 *investigation*. 2002;25(10):816-22.

439 5. Eurostat. European Health Interview Survey - Almost 1 adult in 6 in the EU is considered  
440 obese - Share of obesity increases with age and decreases with education level. 2016.

441 6. Field AE, Coakley EH, Must A, Spadano JL, Laird N, Dietz WH, et al. Impact of overweight  
442 on the risk of developing common chronic diseases during a 10-year period. *Archives of*  
443 *Internal Medicine*. 2001 Jul 9;161(13):1581-6.

444 7. Global BMI Mortality Collaboration, Di Angelantonio E, Bhupathiraju S, Wormser D, Gao P,  
445 Kaptoge S, et al. Body-mass index and all-cause mortality: individual-participant-data meta-  
446 analysis of 239 prospective studies in four continents. *Lancet*. 2016 Aug 20;388(10046):776-  
447 86.

- 1  
2  
3 448 8. Alley DE, Lloyd J, Shardell M. Can obesity account for cross-national differences in life  
4 449 expectancy trends? In: Crimmins EM, Preston SH, Cohen B, editors. International differences  
5 450 in mortality at older ages: Dimensions and sources, panel on understanding divergent trends  
6 451 in longevity in high-income countries. Washington, DC: National Academies Press; 2011. p.  
7 452 164-92.
- 8  
9  
10  
11  
12  
13 453 9. Olshansky SJ, Passaro DJ, Hershov RC, Layden J, Carnes BA, Brody J, et al. A potential  
14 454 decline in life expectancy in the United States in the 21st century. *The New England Journal*  
15 455 *of Medicine*. 2005 Mar 17;352(11):1138-45.
- 16  
17  
18  
19  
20 456 10. Preston SH, Stokes A. Contribution of obesity to international differences in life  
21 457 expectancy. *American Journal of Public Health*. 2011 Nov;101(11):2137-43.
- 22  
23  
24  
25 458 11. National Research Council. The Role of Obesity. In: Crimmins EM, Preston SH, Cohen B,  
26 459 editors. *Explaining Divergent Levels of Longevity in High-Income Countries*. Washington, DC:  
27 460 National Academies Press; 2011. p. 43-55.
- 28  
29  
30  
31 461 12. Leon DA. Trends in European life expectancy: a salutary view. *International Journal of*  
32 462 *Epidemiology*. 2011 Apr;40(2):271-7.
- 33  
34  
35  
36 463 13. NCD Risk Factor Collaboration. Trends in adult body-mass index in 200 countries from  
37 464 1975 to 2014: a pooled analysis of 1698 population-based measurement studies with 19.2  
38 465 million participants. *Lancet*. 2016 Apr 2;387(10026):1377-96.
- 39  
40  
41  
42  
43 466 14. Lobstein T, Leach RJ. Workpackage 7: Overweight and Obesity Report on data collection  
44 467 for overweight and obesity prevalence and related relative risks. 2010.
- 45  
46  
47  
48 468 15. Allison DB, Fontaine KR, Manson JE, Stevens J, VanItallie TB. Annual deaths attributable  
49 469 to obesity in the United States. *JAMA*. 1999 Oct 27;282(16):1530-8.
- 50  
51  
52  
53 470 16. Banegas JR, Lopez-Garcia E, Gutierrez-Fisac JL, Guallar-Castillon P, Rodriguez-Artalejo F. A  
54 471 simple estimate of mortality attributable to excess weight in the European Union. *Eur J Clin*  
55 472 *Nutr*. 2003 Feb;57(2):201-8.
- 56  
57  
58  
59  
60



- 1  
2  
3 473 17. A Robertson, T Lobstein, C Knai. Obesity and socio-economic groups in Europe: Evidence  
4  
5 474 review and implications for action. 2007.  
6  
7  
8 475 18. Flegal KM, Graubard BI, Williamson DF, Gail MH. Excess deaths associated with  
9  
10 476 underweight, overweight, and obesity. JAMA. 2005 Apr 20;293(15):1861-7.  
11  
12  
13 477 19. Katzmarzyk PT, Ardern CI. Overweight and obesity mortality trends in Canada, 1985-  
14  
15 478 2000. Can J Public Health. 2004 Jan-Feb;95(1):16-20.  
16  
17  
18 479 20. GBD 2017 Risk Factor Collaborators. Global, regional, and national comparative risk  
19  
20 480 assessment of 84 behavioural, environmental and occupational, and metabolic risks or  
21  
22 481 clusters of risks for 195 countries and territories, 1990-2017: a systematic analysis for the  
23  
24 482 Global Burden of Disease Study 2017. Lancet. 2018 Nov 10;392(10159):1923-94.  
25  
26  
27 483 21. University of California, Berkeley (USA), and Max Planck Institute for Demographic  
28  
29 484 Research (Germany). [Internet]. []. Available from: <http://www.mortality.org>.  
30  
31  
32 485 22. Barbieri M, Wilmoth JR, Shkolnikov VM, Gleij D, Jasilionis D, Jdanov D, et al. Data  
33  
34 486 Resource Profile: The Human Mortality Database (HMD). Int J Epidemiol. 2015  
35  
36 487 Oct;44(5):1549-56.  
37  
38 488 23. Cleveland WS, Loader C. Smoothing by local regression: Principles and methods. In:  
39  
40 489 Murray Hill: A&T Bell Laboratorie; 1995.  
41  
42  
43 490 24. Rockhill B, Newman B, Weinberg C. Use and misuse of population attributable fractions.  
44  
45 491 American Journal of Public Health. 1998 Jan;88(1):15-9.  
46  
47  
48 492 25. Preston SH, Heuveline P, Guillot M. Demography. Malden, MA: Blackwell; 2001.  
49  
50  
51 493 26. Census data [Internet].; 2011 []. Available from:  
52  
53 494 <https://ec.europa.eu/CensusHub2/query.do?step=selectHyperCube&qhc=false>.  
54  
55  
56 495 27. Flegal KM, Panagiotou OA, Graubard BI. Estimating population attributable fractions to  
57  
58 496 quantify the health burden of obesity. Annals of Epidemiology. 2015 Mar;25(3):201-7.  
59  
60

- 1  
2  
3 497 28. Mehta NK, Chang VW. Secular declines in the association between obesity and mortality  
4 498 in the United States. *Population and Development Review*. 2011;37(3):435-51.  
5  
6  
7  
8 499 29. Yu Y. Reexamining the declining effect of age on mortality differentials associated with  
9 500 excess body mass: evidence of cohort distortions in the United States. *American Journal of*  
10 501 *Public Health*. 2012 May;102(5):915-22.  
11  
12  
13  
14 502 30. Yu Y. The Changing Body Mass-Mortality Association in the United States: Evidence of  
15 503 Sex-Specific Cohort Trends from Three National Health and Nutrition Examination Surveys.  
16 504 *Biodemography and Social Biology*. 2016;62(2):143-63.  
17  
18  
19  
20  
21 505 31. Vidra N, Bijlsma MJ, Janssen F. Impact of Different Estimation Methods on Obesity-  
22 506 Attributable Mortality Levels and Trends: The Case of The Netherlands. *Int J Environ Res*  
23 507 *Public Health*. 2018 Sep 29;15(10):10.3390/ijerph15102146.  
24  
25  
26  
27  
28 508 32. Trias-Llimós S, Kunst AE, Jasilionis D, Janssen F. The contribution of alcohol to the East-  
29 509 West life expectancy gap in Europe from 1990 onward. *International Journal of*  
30 510 *Epidemiology*. 2017;47(3):731-9.  
31  
32  
33  
34 511 33. Doak CM, Wijnhoven TM, Schokker DF, Visscher TL, Seidell JC. Age standardization in  
35 512 mapping adult overweight and obesity trends in the WHO European Region. *Obesity*  
36 513 *Reviews*. 2012 Feb;13(2):174-91.  
37  
38  
39  
40  
41 514 34. Cutler DM, Glaeser EL, Shapiro JM. Why Have Americans Become More Obese? *The*  
42 515 *Journal of Economic Perspectives*. 2003;17(1):93-118.  
43  
44  
45  
46 516 35. Obesity update 2012 [Internet].; 2012 []. Available from:  
47 517 <http://www.oecd.org/els/health-systems/49716427.pdf>.  
48  
49  
50  
51 518 36. Malik VS, Willett WC, Hu FB. Global obesity: trends, risk factors and policy implications.  
52 519 *Nature reviews Endocrinology*. 2013 Jan;9(1):13-27.  
53  
54  
55  
56 520 37. Silventoinen K, Sans S, Tolonen H, Monterde D, Kuulasmaa K, Kesteloot H, et al. Trends in  
57 521 obesity and energy supply in the WHO MONICA Project. *International Journal of Obesity and*  
58 522 *Related Metabolic Disorders*. 2004 May;28(5):710-8.  
59  
60

- 1  
2  
3 523 38. Zatonski WA, Bhala N. Changing trends of diseases in Eastern Europe: closing the gap.  
4  
5 524 Public Health. 2012 Mar;126(3):248-52.  
6  
7  
8 525 39. Bray GA, Bouchard C. Handbook of Obesity: Etiology and Pathophysiology. second ed.  
9  
10 526 Boca Raton: CRC Press Taylor & Francis Group; 2003.  
11  
12  
13 527 40. Monteiro CA, Conde WL, Lu B, Popkin BM. Obesity and inequities in health in the  
14  
15 528 developing world. International Journal of Obesity. 2004 Sep;28(9):1181-6.  
16  
17  
18 529 41. Wilkins E, Wilson L, Wickramasinghe K, Bhatnagar P, Leal J, Luengo-Fernandez R, et al.  
19  
20 530 European Cardiovascular Disease Statistics 2017. Brussels: European Heart Network; 2017.  
21  
22  
23 531 42. Robertson A, Lobstein T, Knai C. Obesity and socio-economic groups in Europe: Evidence  
24  
25 532 review and implications for action. Brussels: European Commission. 2007.  
26  
27  
28 533 43. Fagerli RA, Wandel M. Gender differences in opinions and practices with regard to a  
29  
30 534 "healthy diet". Appetite. 1999 Apr;32(2):171-90.  
31  
32  
33 535 44. Psaltopoulou T, Hatzis G, Papageorgiou N, Androulakis E, Briasoulis A, Tousoulis D.  
34  
35 536 Socioeconomic status and risk factors for cardiovascular disease: Impact of dietary  
36  
37 537 mediators. Hellenic Journal of Cardiology. 2017 Jan - Feb;58(1):32-42.  
38  
39 538 45. WHO. Obesity and inequities. Guidance for addressing inequities in overweight and  
40  
41 539 obesity. Copenhagen: World Health Organization, Regional Office for Europe; 2014.  
42  
43  
44 540  
45  
46 541  
47  
48  
49 542  
50  
51  
52  
53 543  
54  
55  
56  
57  
58  
59  
60

1  
2  
3 544 **Figure legends**  
4

5 545 **Figure 1: Age-standardised obesity-attributable mortality fractions in 26 European**  
6 **countries\* (by 5 regions) and USA, 1975-2014, 18-100 years**  
7  
8

9 547

10  
11 548 \* Countries within the same region are presented with the same colour

12  
13 549 **Central Europe:** Czech Republic, Hungary, Poland, Slovakia

14  
15 550 **Eastern Europe:** Belarus, Estonia, Ukraine, Latvia, Lithuania, Russian Federation

16  
17 551 **Northern Europe:** Denmark, Finland, Iceland, Norway, Sweden

18  
19 552 **Southern Europe:** Italy, Portugal, Spain

20  
21 553 **Western Europe:** Austria, Belgium, France, Ireland, Luxembourg, Netherlands, Switzerland,  
22 United Kingdom

23  
24 555 **USA:** United States of America

25  
26 556

27  
28 557 **Figure 2: Potential gains in life expectancy at birth (PGLE) if obesity-attributable mortality**  
29 **was eliminated, in 26 European countries\* (differentiating Western and Central Eastern**  
30 **Europe) and the USA, 1975-2012, 18-100 years**  
31  
32 559

33  
34 560

35  
36 561 \* Countries within the same region are presented with the same colour

37  
38 562 **Central Eastern Europe:** Belarus, Czech Republic, Estonia, Hungary, Latvia, Lithuania, Poland,  
39 Russian Federation, Slovakia, Ukraine

40  
41 564 **Western Europe:** Austria, Belgium, Denmark, Finland, France, Iceland, Ireland, Italy,  
42 Luxembourg, Netherlands, Norway, Portugal, Spain, Sweden, Switzerland, United Kingdom

43  
44 565 **USA:** United States of America

45  
46 566

47  
48 567  
49  
50 568 **Figure 3: Average annual increase (%) in potential gains in life expectancy due to obesity in**  
51 **26 European countries and the USA between 1975-2012, in men**  
52  
53 569

54  
55 570

56  
57 571 **Figure 4: Average annual increase (%) in potential gains in life expectancy due to obesity in**  
58 **26 European countries and the USA between 1975-2012, in women**  
59  
60 572

573

1  
2  
3 574  
4  
5  
6 575  
7  
8 576  
9  
10 577  
11  
12  
13  
14  
15  
16  
17  
18  
19  
20  
21  
22  
23  
24  
25  
26  
27  
28  
29  
30  
31  
32  
33  
34  
35  
36  
37  
38  
39  
40  
41  
42  
43  
44  
45  
46  
47  
48  
49  
50  
51  
52  
53  
54  
55  
56  
57  
58  
59  
60

For peer review only



Figure 1: Age-standardised obesity-attributable mortality fractions in 26 European countries\* (by 5 regions) and USA, 1975-2014, 18-100 years

\* Countries within the same region are presented with the same colour

Central Europe: Czech Republic, Hungary, Poland, Slovakia

Eastern Europe: Belarus, Estonia, Ukraine, Latvia, Lithuania, Russian Federation

Northern Europe: Denmark, Finland, Iceland, Norway, Sweden

Southern Europe: Italy, Portugal, Spain

Western Europe: Austria, Belgium, France, Ireland, Luxembourg, Netherlands, Switzerland, United Kingdom

USA: United States of America



Figure 2: Potential gains in life expectancy at birth (PGLE) if obesity-attributable mortality was eliminated, in 26 European countries\* (differentiating Western and Central Eastern Europe) and the USA, 1975-2012

\* Countries within the same region are presented with the same colour

Central Eastern Europe: Belarus, Czech Republic, Estonia, Hungary, Latvia, Lithuania, Poland, Russian Federation, Slovakia, Ukraine

Western Europe: Austria, Belgium, Denmark, Finland, France, Iceland, Ireland, Italy, Luxembourg, Netherlands, Norway, Portugal, Spain, Sweden, Switzerland, United Kingdom

USA: United States of America

1  
2  
3  
4  
5  
6  
7  
8  
9  
10  
11  
12  
13  
14  
15  
16  
17  
18  
19  
20  
21  
22  
23  
24  
25  
26  
27  
28  
29  
30  
31  
32  
33  
34  
35  
36  
37  
38  
39  
40  
41  
42  
43  
44  
45  
46  
47  
48  
49  
50  
51  
52  
53  
54  
55  
56  
57  
58  
59  
60



Figure 3: Average annual increase (%) in potential gains in life expectancy due to obesity in 26 European countries and the USA between 1975-2012, in men



1  
2  
3  
4  
5  
6  
7  
8  
9  
10  
11  
12  
13  
14  
15  
16  
17  
18  
19  
20  
21  
22  
23  
24  
25  
26  
27  
28  
29  
30  
31  
32  
33  
34  
35  
36  
37  
38  
39  
40  
41  
42  
43  
44  
45  
46  
47  
48  
49  
50  
51  
52  
53  
54  
55  
56  
57  
58  
59  
60



Figure 4: Average annual increase (%) in potential gains in life expectancy due to obesity in 26 European countries and the USA between 1975-2012, in women

## Impact of obesity on life expectancy among different European countries, 1975-2012

Nikoletta Vidra<sup>1</sup>, Sergi Trias-Llimós<sup>1</sup>, Fanny Janssen<sup>1,2</sup>

<sup>1</sup> Population Research Centre, Faculty of Spatial Sciences, University of Groningen, Landleven 1, 9747 AD Groningen, The Netherlands.

<sup>2</sup> Netherlands Interdisciplinary Demographic Institute, Lange Houtstraat 19, 2511 CV The Hague, The Netherlands

### Supplementary material

**Table S1: Age-and sex-specific RRs of dying from obesity from the meta-review from Lobstein et al. (2010)**

| Age   | RR*    |       |
|-------|--------|-------|
|       | Men    | Women |
| <50   | 1.55   | 1.5   |
| 50-59 | 1.539  | 1.49  |
| 60-69 | 1.5225 | 1.475 |
| 70+   | 1.495  | 1.45  |

\*Reference group for the RRs: normal weight ( $18.5 \leq \text{BMI} \leq 24.9 \text{ kg/m}^2$ )

**Table S2: Potential gains in life expectancy at birth (PGL) if obesity-attributable mortality was eliminated, in 26 European countries (differentiating Western and Central Eastern Europe) and the USA, in 1975 and 2012, 18-100 years**

| Country                             | PGL 1975 |       | PGL 2012 |       |
|-------------------------------------|----------|-------|----------|-------|
|                                     | Men      | Women | Men      | Women |
| <b>Central Eastern Europe (CEE)</b> |          |       |          |       |
| Belarus                             | 0.41     | 0.79  | 1.41     | 1.19  |
| Czech Republic                      | 0.70     | 0.98  | 1.39     | 1.03  |
| Estonia                             | 0.55     | 1.00  | 1.37     | 1.04  |
| Hungary                             | 0.64     | 0.86  | 1.52     | 1.04  |
| Latvia                              | 0.58     | 1.00  | 1.48     | 1.18  |
| Lithuania                           | 0.54     | 1.05  | 1.67     | 1.31  |
| Poland                              | 0.57     | 0.93  | 1.48     | 1.19  |
| Russian Federation                  | 0.51     | 1.26  | 1.53     | 1.54  |
| Slovakia                            | 0.43     | 0.62  | 1.31     | 0.96  |
| Ukraine                             | 0.47     | 0.95  | 1.25     | 1.16  |
| Average CEE                         | 0.54     | 0.94  | 1.44     | 1.16  |
| <b>Western Europe</b>               |          |       |          |       |
| Austria                             | 0.40     | 0.39  | 1.03     | 0.73  |
| Belgium                             | 0.55     | 0.61  | 1.17     | 0.97  |
| Denmark                             | 0.42     | 0.46  | 1.04     | 0.79  |
| France                              | 0.49     | 0.53  | 1.18     | 0.84  |
| Finland                             | 0.45     | 0.40  | 1.19     | 0.90  |
| Ireland                             | 0.38     | 0.31  | 1.21     | 1.01  |
| Iceland                             | 0.49     | 0.48  | 0.97     | 0.80  |
| Italy                               | 0.44     | 0.60  | 1.06     | 0.93  |
| Luxembourg                          | 0.47     | 0.42  | 1.19     | 0.79  |
| Netherlands                         | 0.29     | 0.39  | 0.86     | 0.88  |
| Norway                              | 0.34     | 0.39  | 1.07     | 0.91  |
| Portugal                            | 0.24     | 0.41  | 1.01     | 0.81  |
| Spain                               | 0.42     | 0.66  | 1.22     | 1.05  |
| Sweden                              | 0.42     | 0.43  | 0.91     | 0.76  |
| Switzerland                         | 0.35     | 0.35  | 0.93     | 0.66  |
| United Kingdom                      | 0.53     | 0.50  | 1.27     | 1.09  |
| <b>Average Western Europe</b>       | 0.41     | 0.48  | 1.08     | 0.86  |
| USA                                 | 0.69     | 0.72  | 1.73     | 1.44  |
| <b>Average European countries</b>   | 0.46     | 0.64  | 1.22     | 0.98  |
| <b>Average all countries</b>        | 0.47     | 0.64  | 1.23     | 1.00  |

Figure S1: Age-standardised obesity-attributable mortality fractions in 26 European countries\*, grouped by 5 regions and USA, 1975-2014, 18-100 years



\* Countries within the same region are presented with the same colour

**Figure S2: Potential gains in life expectancy at birth (PGL) if obesity-attributable mortality was eliminated, in 26 European countries\*, grouped by 5 regions and USA, 1975-2012, 18-100 years**



\* Countries within the same region are presented with the same colour

**Table S3: Age-standardised obesity prevalence and 95% confidence intervals, in 26 European countries (differentiating Western and Central Eastern Europe) and USA, 18-100 years in 2012.**

| Country                       | Age-standardised (stand.) obesity prevalence (%) |                          |            |                          |
|-------------------------------|--------------------------------------------------|--------------------------|------------|--------------------------|
|                               | Age-stand.                                       | 95% confidence intervals | Age-stand. | 95% confidence intervals |
|                               | Men                                              |                          | Women      |                          |
| <b>Central Eastern Europe</b> |                                                  |                          |            |                          |
| Belarus                       | 20.4                                             | 13.6; 28.5               | 25.4       | 17.7; 34.1               |
| Czech Republic                | 25.6                                             | 18.9; 33.4               | 25.2       | 18.3; 33.0               |
| Estonia                       | 21.0                                             | 16.0; 26.8               | 22.7       | 17.4; 28.8               |
| Hungary                       | 24.6                                             | 17.9; 32.0               | 22.1       | 15.4; 29.8               |
| Latvia                        | 22.2                                             | 15.2; 30.2               | 25.8       | 18.4; 34.5               |
| Lithuania                     | 23.8                                             | 16.9; 31.8               | 28.7       | 21.2; 37.1               |
| Poland                        | 23.6                                             | 18.0; 29.7               | 25.7       | 19.5; 32.5               |
| Russian Federation            | 20.4                                             | 14.8; 26.8               | 29.1       | 22.6; 36.2               |
| Slovakia                      | 22.2                                             | 15.7; 29.6               | 22.2       | 15.8; 29.6               |
| Ukraine                       | 17.7                                             | 11.2; 25.7               | 23.9       | 16.3; 32.5               |
| <b>Western Europe</b>         |                                                  |                          |            |                          |
| Austria                       | 21.1                                             | 14.7; 28.2               | 19.1       | 13.4; 25.5               |
| Belgium                       | 22.9                                             | 17.3; 29.1               | 22.7       | 17.1; 28.9               |
| Denmark                       | 21.3                                             | 15.5; 27.9               | 18.4       | 13.1; 24.5               |
| France                        | 22.6                                             | 16.3; 29.6               | 23.1       | 16.9; 29.9               |
| Finland                       | 22.3                                             | 17.1; 28.2               | 21.7       | 16.7; 27.3               |
| Ireland                       | 26.2                                             | 19.4; 33.8               | 26.0       | 19.5; 33.2               |
| Iceland                       | 22.3                                             | 15.6; 29.8               | 21.0       | 14.7; 28.3               |
| Italy                         | 22.3                                             | 17.0; 28.1               | 23.5       | 18.1; 29.6               |
| Luxembourg                    | 24.9                                             | 17.6; 32.9               | 20.7       | 14.3; 28.0               |
| Netherlands                   | 18.9                                             | 13.8; 24.5               | 20.3       | 15.3; 25.8               |
| Norway                        | 24.5                                             | 18.5; 31.2               | 23.7       | 18.0; 30.2               |
| Portugal                      | 19.6                                             | 13.8; 26.4               | 21.1       | 15.0; 28.1               |
| Spain                         | 24.2                                             | 18.5; 30.5               | 26.4       | 20.3; 32.8               |
| Sweden                        | 21.6                                             | 16.3; 27.4               | 19.8       | 14.7; 25.6               |
| Switzerland                   | 22.0                                             | 16.3; 28.3               | 18.6       | 13.1; 24.8               |
| United Kingdom                | 26.5                                             | 22.3; 31.2               | 29.1       | 24.8; 33.6               |
| <b>USA</b>                    | 33.4                                             | 27.5; 39.5               | 35.5       | 29.7; 41.5               |

**Table S4: Potential gains in life expectancy at age 50 (PGL e50) if obesity-attributable mortality was eliminated, own estimates and those by Preston et al.2011, in the same countries studied, in 2006**

| Country        | PGL e50 2006,<br>own estimates | PGL e50 2006,<br>Preston's<br>estimates | Difference |
|----------------|--------------------------------|-----------------------------------------|------------|
| <b>Men</b>     |                                |                                         |            |
| Austria        | 0.81                           | 1.00                                    | -0.19      |
| Belgium        | 0.95                           | 0.98                                    | -0.03      |
| Czech Republic | 1.14                           | 1.34                                    | -0.20      |
| Denmark        | 0.88                           | 0.82                                    | 0.06       |
| France         | 0.94                           | 0.99                                    | -0.05      |
| Italy          | 0.88                           | 0.90                                    | -0.02      |
| Netherlands    | 0.69                           | 0.73                                    | -0.04      |
| Poland         | 1.14                           | 1.37                                    | -0.23      |
| Spain          | 1.02                           | 1.15                                    | -0.13      |
| Sweden         | 0.75                           | 0.72                                    | 0.03       |
| Switzerland    | 0.77                           | 0.79                                    | -0.02      |
| United Kingdom | 0.99                           | 1.34                                    | -0.35      |
| USA            | 1.29                           | 1.85                                    | -0.56      |
| <b>Women</b>   |                                |                                         |            |
| Austria        | 0.62                           | 0.71                                    | -0.09      |
| Belgium        | 0.86                           | 0.73                                    | 0.13       |
| Czech Republic | 0.87                           | 1.01                                    | -0.14      |
| Denmark        | 0.71                           | 0.62                                    | 0.09       |
| France         | 0.72                           | 0.52                                    | 0.2        |
| Italy          | 0.84                           | 0.57                                    | 0.27       |
| Netherlands    | 0.76                           | 0.69                                    | 0.07       |
| Poland         | 1.08                           | 1.19                                    | -0.11      |
| Spain          | 0.95                           | 0.87                                    | 0.08       |
| Sweden         | 0.67                           | 0.63                                    | 0.04       |
| Switzerland    | 0.59                           | 0.50                                    | 0.09       |
| United Kingdom | 0.94                           | 1.23                                    | -0.29      |
| USA            | 1.18                           | 1.28                                    | -0.10      |

**Figure S3: Age-standardised obesity prevalence in 26 European countries\*, grouped by 5 regions and USA, 1975-2012, 18-100 years**

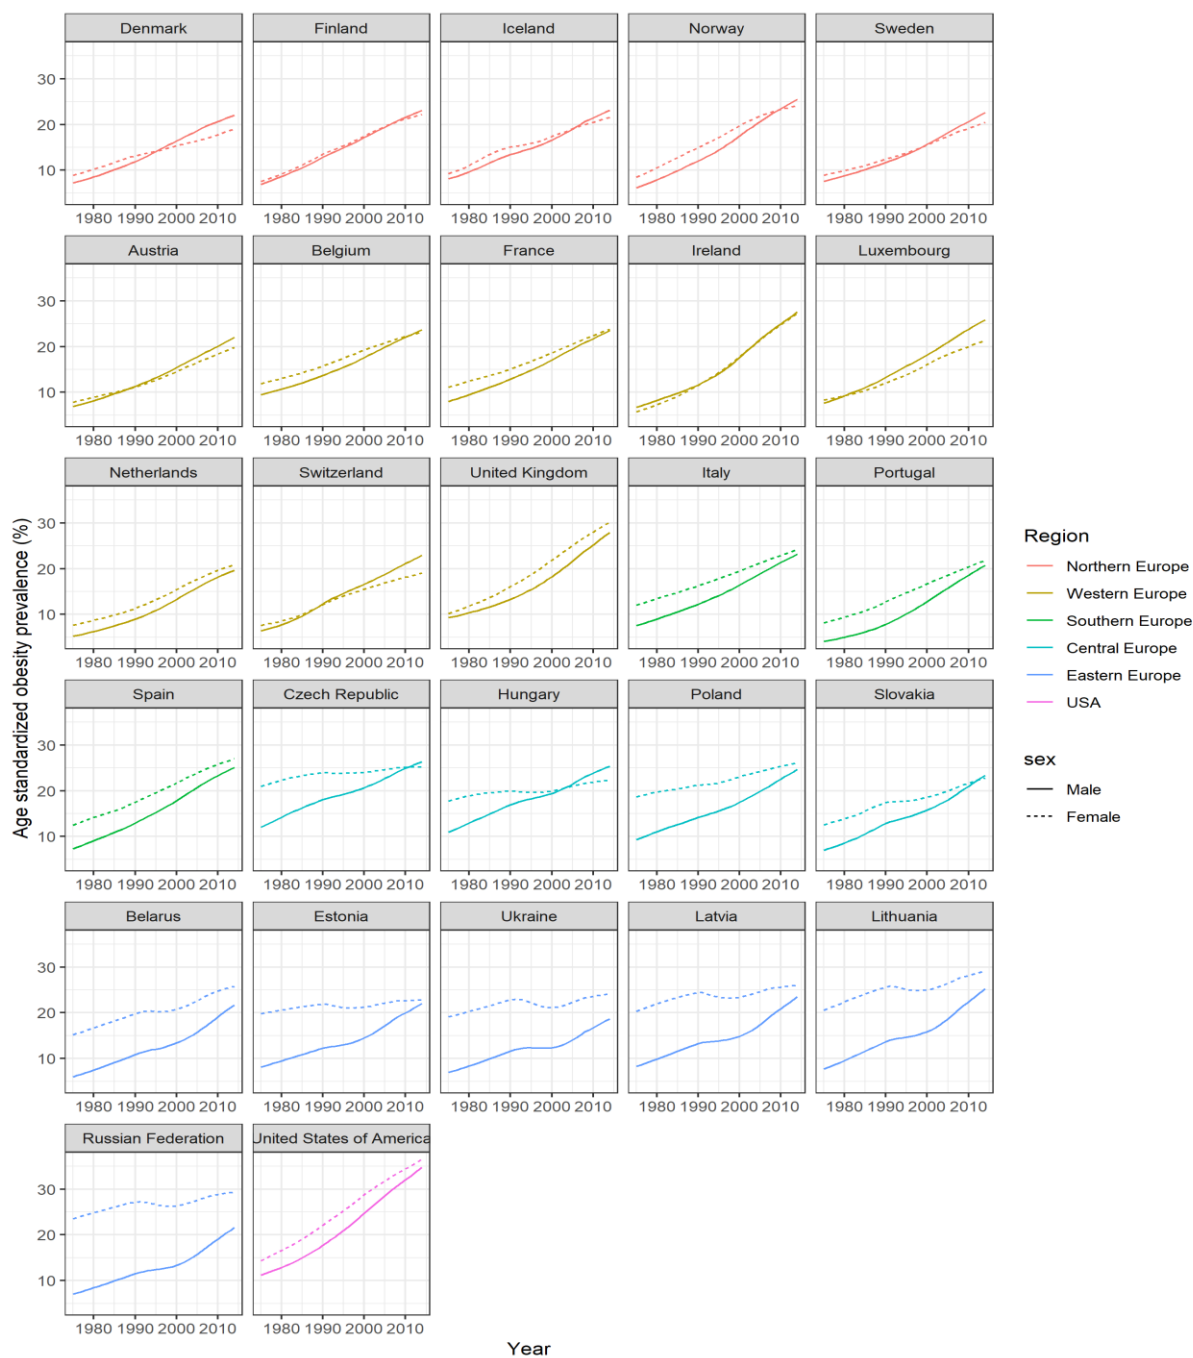

\* Countries within the same region are presented with the same colour
