# Supplementary material for: Impact of obesity on life expectancy among different European countries: secondary analysis of population-level data over the 1975–2012 period
Source: PubMed Central journal article supplement (PMC6678519; doi:10.1136/bmjopen-2018-028086), 2019-07-31
Supplement: bmjopen-2018-028086supp001.pdf [file bmjopen-2018-028086supp001.pdf]

## Impact of obesity on life expectancy among different European countries, 1975-2012

Nikoletta Vidra<sup>1</sup>, Sergi Trias-Llimós<sup>1</sup>, Fanny Janssen<sup>1,2</sup>

<sup>1</sup> Population Research Centre, Faculty of Spatial Sciences, University of Groningen, Landleven 1, 9747 AD Groningen, The Netherlands.

<sup>2</sup> Netherlands Interdisciplinary Demographic Institute, Lange Houtstraat 19, 2511 CV The Hague, The Netherlands

### Supplementary material

**Table S1: Age-and sex-specific RRs of dying from obesity from the meta-review from Lobstein et al. (2010)**

| Age   | RR*        |              |
|-------|------------|--------------|
|       | <i>Men</i> | <i>Women</i> |
| <50   | 1.55       | 1.5          |
| 50-59 | 1.539      | 1.49         |
| 60-69 | 1.5225     | 1.475        |
| 70+   | 1.495      | 1.45         |

\*Reference group for the RRs: normal weight ( $18.5 \leq \text{BMI} \leq 24.9 \text{ kg/m}^2$ )

**Table S2: Potential gains in life expectancy at birth (PGL) if obesity-attributable mortality was eliminated, in 26 European countries (differentiating Western and Central Eastern Europe) and the USA, in 1975 and 2012, 18-100 years**

| Country                             | PGL 1975 |       | PGL 2012 |       |
|-------------------------------------|----------|-------|----------|-------|
|                                     | Men      | Women | Men      | Women |
| <b>Central Eastern Europe (CEE)</b> |          |       |          |       |
| Belarus                             | 0.41     | 0.79  | 1.41     | 1.19  |
| Czech Republic                      | 0.70     | 0.98  | 1.39     | 1.03  |
| Estonia                             | 0.55     | 1.00  | 1.37     | 1.04  |
| Hungary                             | 0.64     | 0.86  | 1.52     | 1.04  |
| Latvia                              | 0.58     | 1.00  | 1.48     | 1.18  |
| Lithuania                           | 0.54     | 1.05  | 1.67     | 1.31  |
| Poland                              | 0.57     | 0.93  | 1.48     | 1.19  |
| Russian Federation                  | 0.51     | 1.26  | 1.53     | 1.54  |
| Slovakia                            | 0.43     | 0.62  | 1.31     | 0.96  |
| Ukraine                             | 0.47     | 0.95  | 1.25     | 1.16  |
| Average CEE                         | 0.54     | 0.94  | 1.44     | 1.16  |
| <b>Western Europe</b>               |          |       |          |       |
| Austria                             | 0.40     | 0.39  | 1.03     | 0.73  |
| Belgium                             | 0.55     | 0.61  | 1.17     | 0.97  |
| Denmark                             | 0.42     | 0.46  | 1.04     | 0.79  |
| France                              | 0.49     | 0.53  | 1.18     | 0.84  |
| Finland                             | 0.45     | 0.40  | 1.19     | 0.90  |
| Ireland                             | 0.38     | 0.31  | 1.21     | 1.01  |
| Iceland                             | 0.49     | 0.48  | 0.97     | 0.80  |
| Italy                               | 0.44     | 0.60  | 1.06     | 0.93  |
| Luxembourg                          | 0.47     | 0.42  | 1.19     | 0.79  |
| Netherlands                         | 0.29     | 0.39  | 0.86     | 0.88  |
| Norway                              | 0.34     | 0.39  | 1.07     | 0.91  |
| Portugal                            | 0.24     | 0.41  | 1.01     | 0.81  |
| Spain                               | 0.42     | 0.66  | 1.22     | 1.05  |
| Sweden                              | 0.42     | 0.43  | 0.91     | 0.76  |
| Switzerland                         | 0.35     | 0.35  | 0.93     | 0.66  |
| United Kingdom                      | 0.53     | 0.50  | 1.27     | 1.09  |
| <b>Average Western Europe</b>       | 0.41     | 0.48  | 1.08     | 0.86  |
| USA                                 | 0.69     | 0.72  | 1.73     | 1.44  |
| <b>Average European countries</b>   | 0.46     | 0.64  | 1.22     | 0.98  |
| <b>Average all countries</b>        | 0.47     | 0.64  | 1.23     | 1.00  |

**Figure S1: Age-standardised obesity-attributable mortality fractions in 26 European countries\*, grouped by 5 regions and USA, 1975-2014, 18-100 years**

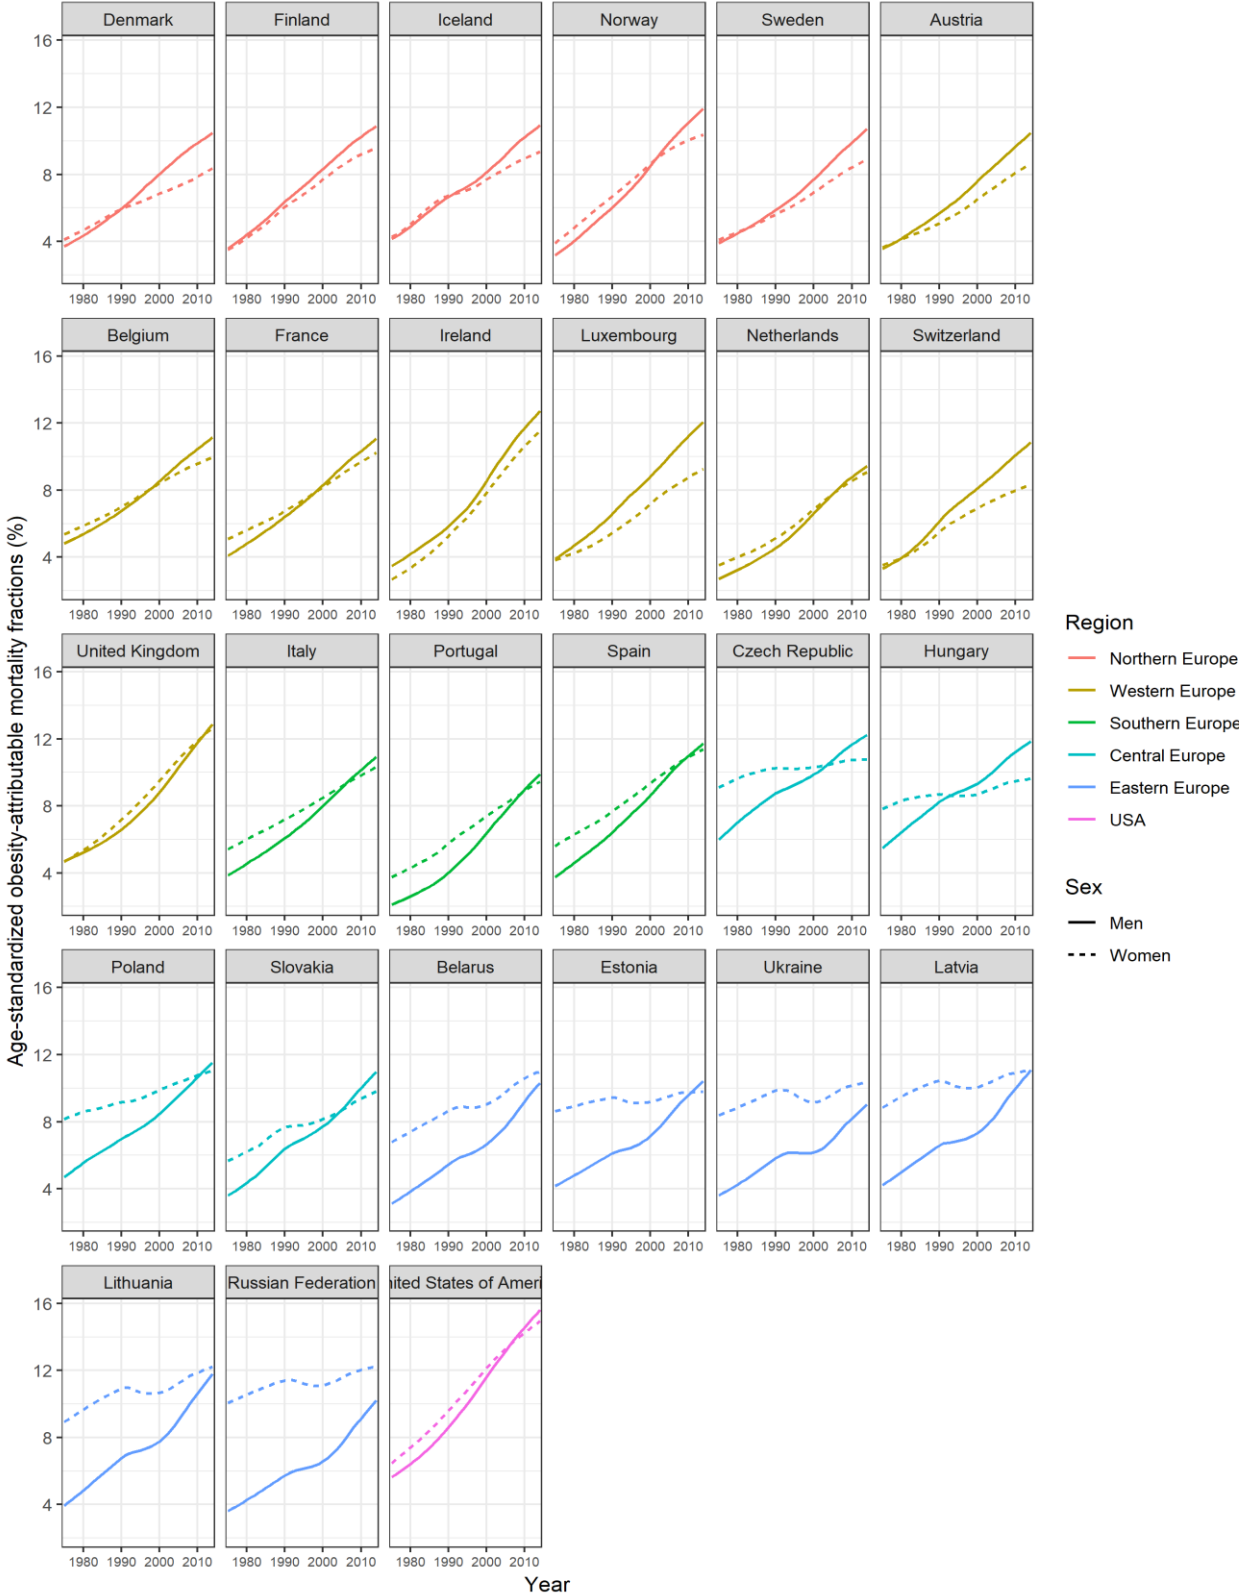

\* Countries within the same region are presented with the same colour

**Figure S2: Potential gains in life expectancy at birth (PGL) if obesity-attributable mortality was eliminated, in 26 European countries\*, grouped by 5 regions and USA, 1975-2012, 18-100 years**

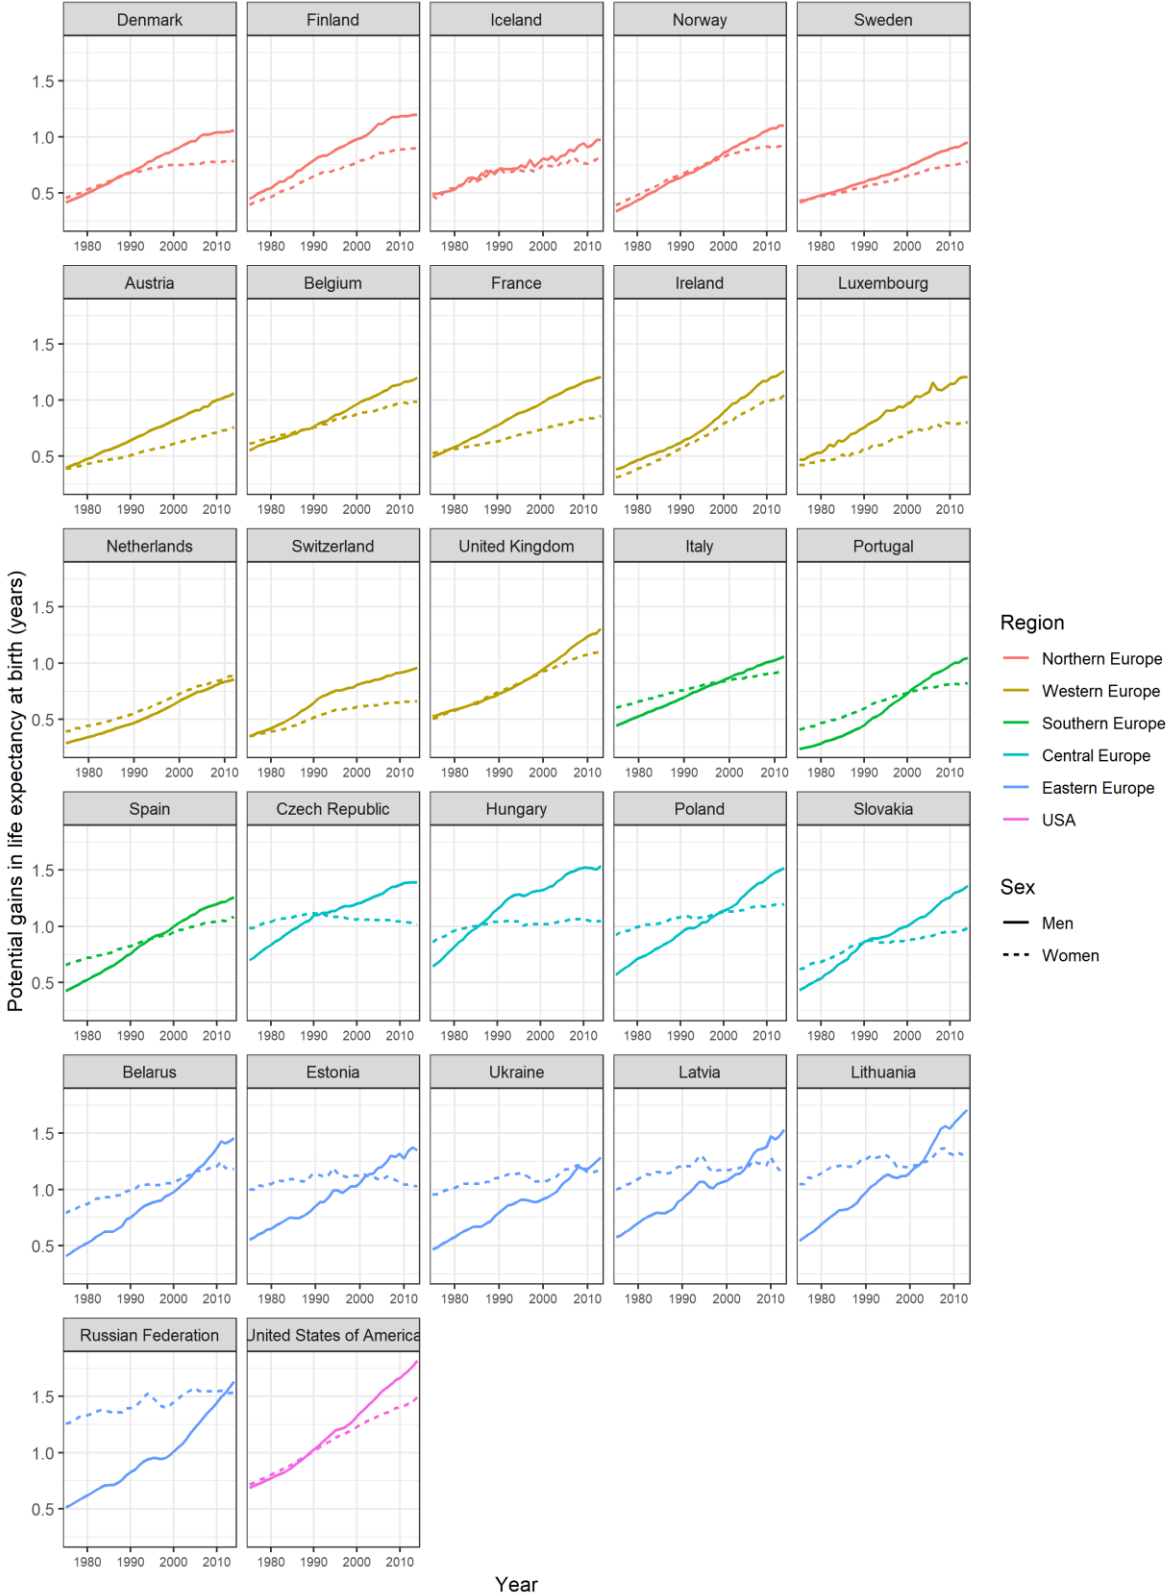

\* Countries within the same region are presented with the same colour

**Table S3: Age-standardised obesity prevalence and 95% confidence intervals, in 26 European countries (differentiating Western and Central Eastern Europe) and USA, 18-100 years in 2012.**

| Country                       | Age-standardised (stand.) obesity prevalence (%) |                          |            |                          |
|-------------------------------|--------------------------------------------------|--------------------------|------------|--------------------------|
|                               | Age-stand.                                       | 95% confidence intervals | Age-stand. | 95% confidence intervals |
|                               | Men                                              |                          | Women      |                          |
| <b>Central Eastern Europe</b> |                                                  |                          |            |                          |
| Belarus                       | 20.4                                             | 13.6; 28.5               | 25.4       | 17.7; 34.1               |
| Czech Republic                | 25.6                                             | 18.9; 33.4               | 25.2       | 18.3; 33.0               |
| Estonia                       | 21.0                                             | 16.0; 26.8               | 22.7       | 17.4; 28.8               |
| Hungary                       | 24.6                                             | 17.9; 32.0               | 22.1       | 15.4; 29.8               |
| Latvia                        | 22.2                                             | 15.2; 30.2               | 25.8       | 18.4; 34.5               |
| Lithuania                     | 23.8                                             | 16.9; 31.8               | 28.7       | 21.2; 37.1               |
| Poland                        | 23.6                                             | 18.0; 29.7               | 25.7       | 19.5; 32.5               |
| Russian Federation            | 20.4                                             | 14.8; 26.8               | 29.1       | 22.6; 36.2               |
| Slovakia                      | 22.2                                             | 15.7; 29.6               | 22.2       | 15.8; 29.6               |
| Ukraine                       | 17.7                                             | 11.2; 25.7               | 23.9       | 16.3; 32.5               |
| <b>Western Europe</b>         |                                                  |                          |            |                          |
| Austria                       | 21.1                                             | 14.7; 28.2               | 19.1       | 13.4; 25.5               |
| Belgium                       | 22.9                                             | 17.3; 29.1               | 22.7       | 17.1; 28.9               |
| Denmark                       | 21.3                                             | 15.5; 27.9               | 18.4       | 13.1; 24.5               |
| France                        | 22.6                                             | 16.3; 29.6               | 23.1       | 16.9; 29.9               |
| Finland                       | 22.3                                             | 17.1; 28.2               | 21.7       | 16.7; 27.3               |
| Ireland                       | 26.2                                             | 19.4; 33.8               | 26.0       | 19.5; 33.2               |
| Iceland                       | 22.3                                             | 15.6; 29.8               | 21.0       | 14.7; 28.3               |
| Italy                         | 22.3                                             | 17.0; 28.1               | 23.5       | 18.1; 29.6               |
| Luxembourg                    | 24.9                                             | 17.6; 32.9               | 20.7       | 14.3; 28.0               |
| Netherlands                   | 18.9                                             | 13.8; 24.5               | 20.3       | 15.3; 25.8               |
| Norway                        | 24.5                                             | 18.5; 31.2               | 23.7       | 18.0; 30.2               |
| Portugal                      | 19.6                                             | 13.8; 26.4               | 21.1       | 15.0; 28.1               |
| Spain                         | 24.2                                             | 18.5; 30.5               | 26.4       | 20.3; 32.8               |
| Sweden                        | 21.6                                             | 16.3; 27.4               | 19.8       | 14.7; 25.6               |
| Switzerland                   | 22.0                                             | 16.3; 28.3               | 18.6       | 13.1; 24.8               |
| United Kingdom                | 26.5                                             | 22.3; 31.2               | 29.1       | 24.8; 33.6               |
| <b>USA</b>                    | 33.4                                             | 27.5; 39.5               | 35.5       | 29.7; 41.5               |

**Table S4: Potential gains in life expectancy at age 50 (PGL e50) if obesity-attributable mortality was eliminated, own estimates and those by Preston et al.2011, in the same countries studied, in 2006**

| <b>Country</b> | <b>PGL e50 2006,<br/>own estimates</b> | <b>PGL e50 2006,<br/>Preston's<br/>estimates</b> | <b>Difference</b> |
|----------------|----------------------------------------|--------------------------------------------------|-------------------|
| <b>Men</b>     |                                        |                                                  |                   |
| Austria        | 0.81                                   | 1.00                                             | -0.19             |
| Belgium        | 0.95                                   | 0.98                                             | -0.03             |
| Czech Republic | 1.14                                   | 1.34                                             | -0.20             |
| Denmark        | 0.88                                   | 0.82                                             | 0.06              |
| France         | 0.94                                   | 0.99                                             | -0.05             |
| Italy          | 0.88                                   | 0.90                                             | -0.02             |
| Netherlands    | 0.69                                   | 0.73                                             | -0.04             |
| Poland         | 1.14                                   | 1.37                                             | -0.23             |
| Spain          | 1.02                                   | 1.15                                             | -0.13             |
| Sweden         | 0.75                                   | 0.72                                             | 0.03              |
| Switzerland    | 0.77                                   | 0.79                                             | -0.02             |
| United Kingdom | 0.99                                   | 1.34                                             | -0.35             |
| USA            | 1.29                                   | 1.85                                             | -0.56             |
| <b>Women</b>   |                                        |                                                  |                   |
| Austria        | 0.62                                   | 0.71                                             | -0.09             |
| Belgium        | 0.86                                   | 0.73                                             | 0.13              |
| Czech Republic | 0.87                                   | 1.01                                             | -0.14             |
| Denmark        | 0.71                                   | 0.62                                             | 0.09              |
| France         | 0.72                                   | 0.52                                             | 0.2               |
| Italy          | 0.84                                   | 0.57                                             | 0.27              |
| Netherlands    | 0.76                                   | 0.69                                             | 0.07              |
| Poland         | 1.08                                   | 1.19                                             | -0.11             |
| Spain          | 0.95                                   | 0.87                                             | 0.08              |
| Sweden         | 0.67                                   | 0.63                                             | 0.04              |
| Switzerland    | 0.59                                   | 0.50                                             | 0.09              |
| United Kingdom | 0.94                                   | 1.23                                             | -0.29             |
| USA            | 1.18                                   | 1.28                                             | -0.10             |

**Figure S3: Age-standardised obesity prevalence in 26 European countries\*, grouped by 5 regions and USA, 1975-2012, 18-100 years**

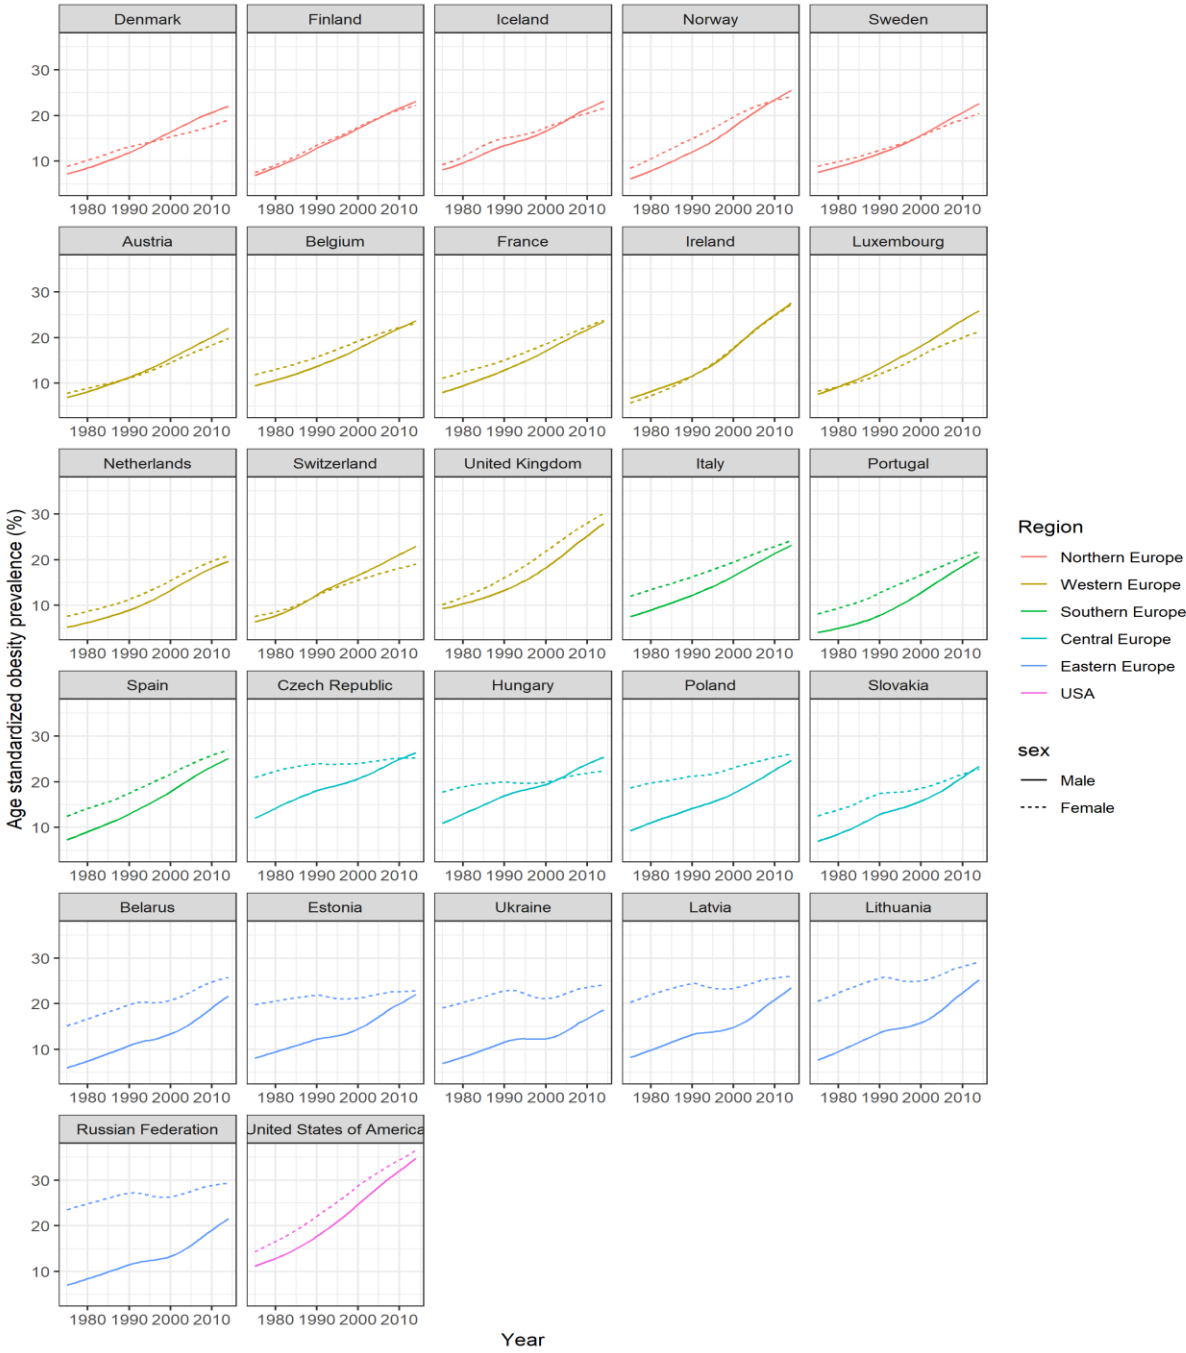

\* Countries within the same region are presented with the same colour
